# Supplementary material for: Drought-Responsive Mechanisms in Plant Leaves Revealed by Proteomics
Source: Int J Mol Sci. 2016 Oct 18;17(10):1706. doi: 10.3390/ijms17101706 (PMC5085738; doi:10.3390/ijms17101706)
Supplement: Supplementary file 1 [file ijms-17-01706-s001.xlsx]

## Sheet: Table S1
	Table S1. Drought-responsive proteins in leaves identified in 25 plant species reported by 44 studies.
	Function and name of unique proteins/protein familiesa	Abbreviation	No.b		Protein names in original research articles	Accession Number and others	GI Number	Protein change patternc							Plant species	Referencesd
	01 Signaling (55)
	Phytochrome C1	PhyC1	1		Phytochrome C1 (PhyC1)		gi|37926897	↓(12.5% soil water, 6d, 2023)↑(12.5% soil water, 6d, CE704)							Zea mays L.	Benesova et al. 2012
	TGF-beta receptor-interacting protein 1	TRIP1	1		TGF-beta receptor-interacting protein 1	115475824		↑(30% relative water content)							Sporobolus stapﬁanus	Oliver et al.,2011
	Auxin-binding protein	ABP	7		Putative auxin-binding protein 2	167857053	GO:0045735		↓(15% soil water, 8d)						Quercus robur L.	Sergeant et al.,2011
					Putative auxin-binding protein 2	167857053	GO:0045735								Quercus robur L.	Sergeant et al.,2011
					Putative auxin-binding protein 2	167857053	GO:0045735			↑(15% soil water, 56d)					Quercus robur L.	Sergeant et al.,2011
					Auxin-binding protein ABP20	ACG30276.1	gi|149109407	↓(12.5% soil water, 6d, 2023)↑(12.5% soil water, 6d, CE704)							Zea mays L.	Benesova et al. 2012
					Auxin-binding protein ABP19a precursor, putative		gi|255560629	↓(35% soil water, 7d)							Populus tremula L. × P. alba L.-clone INRA 717–1-B4	Bohler,et al., 2013
					Auxin-binding protein ABP19a precursor, putative		gi|255560629			↓(35% soil water, 21d)					Populus tremula L. × P. alba L.-clone INRA 717–1-B4	Bohler,et al., 2013
					Auxin-binding protein ABP19a precursor, putative		gi|157058854			↓(rewater,7d)					Populus tremulaL.×P. albaL.	Durand et al.,2011
	Signal recognition particle	—	2		signal recognition particle 43 kda chloroplastic	AT2G47450			↓(no watering, 7d)	↓(no watering, 10d)	↑(no watering, 14d)				Brassica napus	Koh et al., 2015
					signal recognition particle 54 kda chloroplastic	AT5G03940				↓(no watering, 10d)					Brassica napus	Koh et al., 2015
	Heterotrimeric G protein	—	1		GTP-binding protein G alpha subunit			↑(35% RWC)							Gossypium herbaceum L.	Deeba et al., 2012
	Monomeric small GTPases	Ran	2		Ran-related GTP binding protein			↑(not irrigation, 10d, Midnight)↑(not irrigation, 10d, Brilliant)	↑(not irrigation, 15d, Midnight)↑(not irrigation, 15d, Brilliant)						Kentucky Bluegrass	Xu et al.,2010
					GTP-binding nuclear protein Ran/TC4		gi|585783	↓(no irrigation, 107d)							Cistus albidus	Brossa et al., 2015
		RanBP	1		Ran-binding protein 1	gb|EU960326.1|	gi|116826473	↑(12.5% soil water, 6d, 2023)↑(12.5% soil water, 6d, CE704)							Zea mays L.	Benesova et al. 2012
		Rab	2		Rab GTPase E1B	TC286691		↓(drought, 5d, RAC875,tolerant)			↑(rewater, 25d, Excalibur)↑(rewater, 25d, RAC875)				Triticum aestivum L.	Ford et al., 2011
					Ras-related protein Rab7	Q40787.1	gi|149063779	↑(12.5% soil water, 6d, 2023)↑(12.5% soil water, 6d, CE704)							Zea mays L.	Benesova et al. 2012
	GDP dissociation inhibitor	GDI	2		Putative GDP dissociation inhibitor	51854409		↑(30% relative humidity, 48h)	↑(30% relative humidity, 72h)	↑(30% relative humidity, 96h)		↑(30% relative humidity, 144h)	↑(30% relative humidity, 168h)	↑(30% relative humidity, 192h)	Oryza sativa L.	Pandey et al.,2010
					Putative GDP dissociation inhibitor	51854409		↑(30% relative humidity, 48h)	↑(30% relative humidity, 72h)	↑(30% relative humidity, 96h)	↑(30% relative humidity, 120h)	↑(30% relative humidity, 144h)	↑(30% relative humidity, 168h)	↑(30% relative humidity, 192h)	Oryza sativa L.	Pandey et al.,2010
	Nuclear transport factor 2 and rna recognition motif domain-containing protein	——	1		nuclear transport factor 2 and rna recognition motif domain-containing protein	AT5G60980				↓(no watering, 10d)					Brassica napus	Koh et al., 2015
	Serine threonine kinase	STK	2		Serine threonine kinase		gi|18092335	↑(12.5% soil water, 6d, 2023)↑(12.5% soil water, 6d, CE704)							Zea mays L.	Benesova et al. 2012
					Similar to cdc2 protein kinases			↑(35% RWC)							Gossypium herbaceum L.	Deeba et al., 2012
	Calreticulin	CRT	2		Calreticulin-1	A0A762		↑(drought,4d)							Glycine max L.	Mohammadi et al., 2012
					Calreticulin-1	117165712	GO:0019538				↓(15% soil water, 65d)				Quercus robur L.	Sergeant et al.,2011
	Calcium ion binding protein	CaB	2		Calcium ion binding protein	gb|EU971140.1|	gi|101384529	↓(12.5% soil water, 6d, 2023)↑(12.5% soil water, 6d, CE704)							Zea mays L.	Benesova et al. 2012
					calcium-binding protein cml13	AT1G12310			↑(no watering, 7d)	↓(no watering, 10d)					Brassica napus	Koh et al., 2015
	Calcium sensing receptor	CaSR	1		CaS (Calcium sensing receptor)	TC346855		↓(drought, 5d, RAC875)							Triticum aestivum L.	Ford et al., 2011
	Calmodulin	CAM	1		calmodulin	AT3G43810		↑(no watering, 3d)		↓(no watering, 10d)					Brassica napus	Koh et al., 2015
	Calcium sensing chloroplastic	——	1		calcium sensing chloroplastic	AT5G23060				↑(no watering, 10d)					Brassica napus	Koh et al., 2015
	Calcium-dependent protein kinase	CDPK	3		calcium-dependent protein kinase 2-like	AT3G10660		↓(no watering, 3d)	↑(no watering, 7d)	↑(no watering, 10d)	↓(no watering, 14d)				Brassica napus	Koh et al., 2015
					Calcium dependent protein kinase (CDPK-related protein kinase)		gi|55741069	↓(12.5% soil water, 6d, 2023)↑(12.5% soil water, 6d, CE704)							Zea mays L.	Benesova et al. 2012
					Putative CDPK-related protein kinase	33146627		↓(30% relative water content)							Sporobolus stapﬁanus	Oliver et al.,2011
	14-3-3 protein	14-3-3	16		14-3-3 protein	226666		↑(stop watering, 7d, B)							Hordeum vulgare L.	Wendelboe-Nelson et al., 2010
					14-3-3 protein			↑(35% RWC)							Gossypium herbaceum L.	Deeba et al., 2012
					14-3-3-like protein		gi|112685	↑(12.5% soil water, 6d, 2023)↑(12.5% soil water, 6d, CE704)							Zea mays L.	Benesova et al. 2012
					14-3-3-like protein	ACG35164.1	gi|111990915	↑(12.5% soil water, 6d, 2023)↑(12.5% soil water, 6d, CE704)							Zea mays L.	Benesova et al. 2012
					14-3-3-like protein	NP_001149514.1	gi|148969886	↑(12.5% soil water, 6d, 2023)↑(12.5% soil water, 6d, CE704)							Zea mays L.	Benesova et al. 2012
					14-3-3-like protein	NP_001151592.1	gi|116828663	↑(12.5% soil water, 6d, 2023)↑(12.5% soil water, 6d, CE704)							Zea mays L.	Benesova et al. 2012
					14-3-3-like protein		gi|148612111	↑(no irrigation,7d)							Medicago sativa L.	Aranjuelo et al., 2011
					14-3-3-like protein		gi|148612111	↑(no irrigation,7d)							Medicago sativa L.	Aranjuelo et al., 2011
					14-3-3-like protein		gi|162458469	↑(12.5% soil water, 6d, 2023)↑(12.5% soil water, 6d, CE704)							Zea mays L.	Benesova et al. 2012
					14-3-3-like protein	NP_001149400.1	gi|148939449	↑(12.5% soil water, 6d, 2023)↑(12.5% soil water, 6d, CE704)							Zea mays L.	Benesova et al. 2012
					14-3-3-Like protein A	P29305		↓(25% field capacity, 28d, Piriformospora indica-inoculated)							Hordeum vulgare L.	Ghabooli et al.,2013
					14-3-3-like protein GF14-Delta	110278805		↑(30% relative water content)							Sporobolus stapﬁanus	Oliver et al.,2011
					14-3-3-like protein GF14-Delta	110278805		↑(30% relative water content)							Sporobolus stapﬁanus	Oliver et al.,2011
					GF14-c protein	1519251		↑(30% relative humidity, 48h)	↑(30% relative humidity, 72h)	↑(30% relative humidity, 96h)	↑(30% relative humidity, 120h)	↑(30% relative humidity, 144h)	↑(30% relative humidity, 168h)	↑(30% relative humidity, 192h)	Oryza sativa L.	Pandey et al.,2010
					Putative GF14-b protein	50251704		↑(30% relative humidity, 48h)	↑(30% relative humidity, 72h)						Oryza sativa L.	Pandey et al.,2010
					14-3-3-like protein gf14 psi	AT5G38480				↑(no watering, 10d)					Brassica napus	Koh et al., 2015
	Ethylene-responsive transcription factor	ERF	1		Ethylene-responsive transcription factor	NP_172758.1		↑(35% RWC)							Gossypium herbaceum L.	Deeba et al., 2012
	1-Aminocyclopropane-1-carboxylate oxidase	ACO	1		1-Aminocyclopropane-1-carboxylate oxidase	Q9MB74		↓(25% field capacity, 18d)	↓(rewater, 28d)						Populus deltoides×Populus nigra	Bonhomme et al.,2009
	Phospholipase D	PLD	1		Phospholipase D	dbj|D73410.1|MZEPHD1	gi|149013743	↑(12.5% soil water, 6d, 2023)↑(12.5% soil water, 6d, CE704)							Zea mays L.	Benesova et al. 2012
	Serine/threonine-protein phosphatase 5	PSP5	1		Serine/threonine-protein phosphatase 5	gb|EU965485.1|	gi|149082499	↓(12.5% soil water, 6d, 2023)↑(12.5% soil water, 6d, CE704)							Zea mays L.	Benesova et al. 2012
	Protein phosphatase 2C	PP2C	1		Protein phosphatase 2C	NP_001151619.1	gi|148931015	↓(12.5% soil water, 6d, 2023)↑(12.5% soil water, 6d, CE704)							Zea mays L.	Benesova et al. 2012
	ABA modulated tyrosine-phosphorylated protein	TPP	1		ABA modulated tyrosine-phosphorylated protein	AT5G02240				↓(no watering, 10d)					Brassica napus	Koh et al., 2015
	Annexin-like protein RJ4-like	ALP	1		Annexin-like protein RJ4-like		gi|356556839	↑(no irrigation, 17d, Starozagorski)							Phaseolus vulgaris	Zadraznik et al.,2013
	02 Stress and denfense (301)
	02.1 ROS scavenging (213)
	Superoxide dismutase	Cu/Zn SOD	18		Copper/zinc superoxide dismutase	12697818			↓(30% relative humidity, 72h)		↓(30% relative humidity, 120h)	↓(30% relative humidity, 144h)		↓(30% relative humidity, 192h)	Oryza sativa L.	Pandey et al.,2010
					Cu/Zn superoxide dismutase 1	TC283474		↑(drought, 5d, RAC875)	↑(drought, 14d, Excalibur)↑(drought, 14d, Kukri)	↑(drought, 24d, Excalibur)↑(drought, 24d, Kukri)↑(drought, 24d, RAC875)	↑(rewater, 25d, Kukri)↑(rewater, 25d, RAC875)				Triticum aestivum L.	Ford et al., 2011
					Cu/Zn superoxide dismutase 2	TC279166		↑(drought, 5d, RAC875)	↑(drought, 14d, Kukri)	↑(drought, 24d, Excalibur)↑(drought, 24d, RAC875)	↑(rewater, 25d, Kukri)				Triticum aestivum L.	Ford et al., 2011
					Superoxide dismutase [Cu–Zn]		gi|71040665	↑(no irrigation, 107d)							Cistus albidus	Brossa et al., 2015
					Superoxide dismutase [Cu-Zn]	P28757		↑(25% ﬁeld capacity)							Triticum aestivum L.grass (Elymus elongatum)	Gazanchian et al., 2007
					Superoxide dismutase [Mn] 3.3 (mitochondrial)		gi|1174390	↑(12.5% soil water, 6d, 2023)↑(12.5% soil water, 6d, CE704)							Zea mays L.	Benesova et al. 2012
					Superoxide dismutase 3		gi|162461288	↑(withholding irrigation, 15d, Tifway)							Cynodon dactylon L. Pers. ×Cynodon transvaalensis Burtt Davy, cv. Tifway,Cynodon dactylon L.	Zhao et al., 2011
					copper zinc superoxide dismutase	AT2G28190			↑(no watering, 7d)	↑(no watering, 10d)					Brassica napus	Koh et al., 2015
					superoxide dismutase	AT1G08830			↑(no watering, 7d)	↑(no watering, 10d)					Brassica napus	Koh et al., 2015
					Superoxide dismutase (Cu-Zn),cytosolic	P28757		↑(withhold water 38d, CT9993,TR62266)	↑(withhold water 43d, CT9993,TR62266)	↑(rewater 5d, CT9993,TR62266)	↑(rewater 10d, CT9993,TR62266)				Oryza sativa L.	Salekdeh et al., 2002
					Superoxide dismutase (Cu-Zn),chloroplast	P93407		↓(withhold water 38d, TR62266)	↑(withhold water 43d, CT9993)↓(withhold water 43d, TR62266)						Oryza sativa L.	Salekdeh et al., 2002
					Superoxide dismutase [Cu−Zn]2	115473931		↓(30% relative water content)							Sporobolus stapﬁanus	Oliver et al.,2011
					Copper/zinc superoxide dismutase 2	AT2G28190.1		↓(45–55% field capacity, Qinguan)	↓(45–55% field capacity, Naganofuji No. 2)						Malus domestica Borkh.	Zhou et al., 2015
					Copper/zinc superoxide dismutase 1	AT1G08830.2		↓(45–55% field capacity, Qinguan)	=						Malus domestica Borkh.	Zhou et al., 2015
					Copper/zinc superoxide dismutase 3	AT5G18100.1		↓(45–55% field capacity, Qinguan)	=						Malus domestica Borkh.	Zhou et al., 2015
					Copper/zinc superoxide dismutase 2	AT2G28190.1		↓(45–55% field capacity, Qinguan)	=						Malus domestica Borkh.	Zhou et al., 2015
					Copper/zinc superoxide dismutase 1	AT1G08830.2		↓(45–55% field capacity, Qinguan)	=						Malus domestica Borkh.	Zhou et al., 2015
					Superoxide dismutase [Cu-Zn] chloroplastic	P93407		↑（no irrigation, 20 d）							Oryza sativa L.	Ji et al., 2012
		MnSOD	6		Mn superoxide dismutase 1	TC325434				↑(drought, 24d, Excalibur)↑(drought, 24d, Kukri)↑(drought, 24d, RAC875)	↑(rewater, 25d, RAC875)				Triticum aestivum L.	Ford et al., 2011
					Manganese superoxide dismutase	gi|1654387		↑(not irrigation, 9d, TR)↑(not irrigation, 9d, TTD)↑(not irrigation, 9d, Kn)							Triticum aestivum L.	Budak et al.,2013
					Manganese superoxide dismutase (MnSOD)		gi|10862818	↑(soil water potential -1.5 MPa, 4d)	↑(soil water potential -3.0 MPa, 7d)						Populus ×euramericana	He et al.,2008
					Superoxide dismutase		gi|23534609	↑(no irrigation,7d)							Medicago sativa L.	Aranjuelo et al., 2011
					Manganese-superoxide dismutase		gi|27526758	↑(no irrigation, 17d,Tiber)↑(no irrigation, 17d, Starozagorski)							Phaseolus vulgaris	Zadraznik et al.,2013
					Mn superoxide dismutase 1 (SOD)	AT3G10920		↓(no watering, 3d)			↑(no watering, 14d)				Brassica napus	Koh et al., 2015
		FeSOD	2		Fe superoxide dismutase	AT5G51100.1		↑(45–55% field capacity, Qinguan,tolerant)	↓(45–55% field capacity, Naganofuji No. 2)						Malus domestica Borkh.	Zhou et al., 2015
					Fe superoxide dismutase (SOD)	AT4G25100			↓(no watering, 7d)		↑(no watering, 14d)				Brassica napus	Koh et al., 2015
	Catalase	CAT	20		CATA1; Catalase-1	Q43206		↑(1/3 of field capacity, 14h, Mutant)							Triticum aestivum L.	Peremarti et al.,2014
					Catalase	TC323408		↑(drought, 5d, Excalibur)↑(drought, 5d, Kukri)↑(drought, 5d, RAC875)	↑(drought, 14d, Excalibur)↑(drought, 14d, Kukri)↑(drought, 14d, RAC875)	↑(drought, 24d, Excalibur)↑(drought, 24d, Kukri)↑(drought, 24d, RAC875)	↑(rewater, 25d, Excalibur)↑(rewater, 25d, Kukri)↑(rewater, 25d, RAC875)				Triticum aestivum L.	Ford et al., 2011
					Catalase-1			↑(25% soil water, NT)							Agrostis stolonifera	Merewitz et al., 2011
					Possible: catalase		gi|1705626	↑(25% soil water, NT)							Agrostis stolonifera	Merewitz et al., 2011
					Catalase-1				↑(25% soil water, SAG12-ipt)						Agrostis stolonifera	Merewitz et al., 2011
					Catalase-1				↓(25% soil water, SAG12-ipt)						Agrostis stolonifera	Merewitz et al., 2011
					Catalase-1		gi|2493543								Poa pratensis L.	Xu amd Huang, 2012
					Catalase-1		gi|2493543								Poa pratensis L.	Xu amd Huang, 2012
					Catalase-1		gi|2493543	↑(drought, 10d)							Poa pratensis L.	Xu amd Huang, 2012
					Catalase-1		gi|2493543								Poa pratensis L.	Xu amd Huang, 2012
					Catalase-1			↓(not irrigation, 10d, Midnight)↓(not irrigation, 10d, Brilliant)	↓(not irrigation, 15d, Brilliant)						Kentucky Bluegrass	Xu et al.,2010
					Catalase isozyme 1		gi|1345674		↑(rewater, 26d)						Cistus albidus	Brossa et al., 2015
					Catalase 2	AT4G35090.1		↑(45–55% field capacity, Qinguan，tolerant)	=						Malus domestica Borkh.	Zhou et al., 2015
					Catalase 2	AT4G35090.1		↑(45–55% field capacity, Qinguan，tolerant)	=						Malus domestica Borkh.	Zhou et al., 2015
					Catalase 2	AT4G35090.1		↑(45–55% field capacity, Qinguan，tolerant)	=						Malus domestica Borkh.	Zhou et al., 2015
					catalase 2	AT4G35090		↑(no watering, 3d)		↑(no watering, 10d)					Brassica napus	Koh et al., 2015
					Catalase (isozyme 2)	NP_001105310.1	gi|149095776	↓(12.5% soil water, 6d, 2023)↑(12.5% soil water, 6d, CE704)							Zea mays L.	Benesova et al. 2012
					Catalase (isozyme 2)	P12365.3	gi|149095777	↓(12.5% soil water, 6d, 2023)↑(12.5% soil water, 6d, CE704)							Zea mays L.	Benesova et al. 2012
					catalase 3	AT1G20620		↑(no watering, 3d)	↑(no watering, 7d)	↑(no watering, 10d)	↑(no watering, 14d)				Brassica napus	Koh et al., 2015
					Catalase isozyme 1		gi|1345673			↑(rewater,7d)					Populus tremulaL.×P. albaL.	Durand et al.,2011
	Peroxidase	POD	8		Peroxidase	Q94IQ1				↓(no irrigation, 86d)					Populus deltoides×Populus nigra	Bonhomme et al.,2009
					Peroxidase	Q94IQ1		↑(no irrigation, 14d)							Quercus ilex	Echevarrı´a-Zomen˜o et al., 2009
					Peroxidase 1 precursor		gi|5002342	↑(no irrigation, 17d, Starozagorski,sensitive)							Phaseolus vulgaris	Zadraznik et al.,2013
					Peroxidase 56	TC295341									Triticum aestivum L.	Ford et al., 2011
					Peroxidase precursor, putative, expressed			↑(stop irrigation 35d,481-B,tolerant)							Oryza sativa L.	Raorane et al., 2015
					Peroxidase precursor, putative, expressed			↑(stop irrigation 35d,481-B,tolerant)							Oryza sativa L.	Raorane et al., 2015
					peroxidase 34	AT3G49120			↓(no watering, 7d)						Brassica napus	Koh et al., 2015
					Peroxidase 3 precursor, putative		gi|223545186	↓(withholding water, 8d)							Populus tremulaL.×P. albaL.	Durand et al.,2011
	Peroxiredoxin	Prx	15		Peroxiredoxin		gi|11558242								Quercus ilex	Valero-Galvan et al.,2013
					Peroxiredoxin Q	TC278939		↑(drought, 5d, RAC875)	↑(drought, 14d, Kukri)	↑(drought, 24d, Excalibur)↑(drought, 24d, RAC875)	↑(rewater, 25d, Excalibur)↑(rewater, 25d, Kukri)↑(rewater, 25d, RAC875)				Triticum aestivum L.	Ford et al., 2011
					Peroxiredoxin type 2, putative			↑(35% RWC)							Gossypium herbaceum L.	Deeba et al., 2012
					Peroxiredoxin, putative	223531975	GO:0006979				↑(15% soil water, 65d)				Quercus robur L.	Sergeant et al.,2011
					Peroxiredoxin-2C		gi|115439131	↑(withholding irrigation, 15d, Tifway)							Cynodon dactylon L. Pers. ×Cynodon transvaalensis Burtt Davy, cv. Tifway,Cynodon dactylon L.	Zhao et al., 2011
					Peroxiredoxin-2E	TC284344		↓(drought, 5d, RAC875)	↓(drought, 14d, Kukri)						Triticum aestivum L.	Ford et al., 2011
					Putative peroxiredoxin, mitochondrial precursor	Q9M7T0									Quercus ilex	Echevarrı´a-Zomen˜o et al., 2009
					Peroxiredoxin, putative, expressed			↑(stop irrigation 35d,481-B)							Oryza sativa L.	Raorane et al., 2015
					Peroxiredoxin, putative, expressed			↑(stop irrigation 35d,481-B)							Oryza sativa L.	Raorane et al., 2015
					Peroxiredoxin, putative, expressed			↑(stop irrigation 35d,481-B)							Oryza sativa L.	Raorane et al., 2015
					peroxiredoxin- chloroplastic-like	AT3G52960		↑(no watering, 3d)	↓(no watering, 7d)	↓(no watering, 10d)					Brassica napus	Koh et al., 2015
					peroxiredoxin- chloroplastic-like	AT3G52960			↑(no watering, 7d)	↑(no watering, 10d)	↑(no watering, 14d)				Brassica napus	Koh et al., 2015
					peroxiredoxin- mitochondrial	AT3G06050				↓(no watering, 10d)	↑(no watering, 14d)				Brassica napus	Koh et al., 2015
					peroxiredoxin q	AT3G26060				↑(no watering, 10d)	↑(no watering, 14d)				Brassica napus	Koh et al., 2015
					thioredoxin-dependent peroxidase 1 (TPX1)	AT1G65980		↑(no watering, 3d)	↓(no watering, 7d)		↓(no watering, 14d)				Brassica napus	Koh et al., 2015
	2-Cys peroxiredoxin	2-Cys Prx	22		2-Cys peroxiredoxin	Q93X25				↑(no irrigation, 86d)					Populus deltoides×Populus nigra	Bonhomme et al.,2009
					2-Cys peroxiredoxin	Q93X25				↑(no irrigation, 86d)					Populus deltoides×Populus nigra	Bonhomme et al.,2009
					2-Cys peroxiredoxin BAS1, chloroplastic	Q96468		↑(25% field capacity, 28d, Piriformospora indica-inoculated)							Hordeum vulgare L.	Ghabooli et al.,2013
					2-Cys peroxiredoxin BAS1, chloroplastic	Q96468		↑(25% field capacity, 28d, Piriformospora indica-inoculated)							Hordeum vulgare L.	Ghabooli et al.,2013
					2-Cys peroxiredoxin BAS1, chloroplastic	Q96468		↑(25% field capacity, 28d, Piriformospora indica-inoculated)							Hordeum vulgare L.	Ghabooli et al.,2013
					2-Cys peroxiredoxin BAS1, chloroplastic (fragment)	Q96468		↑(25% field capacity, 28d, Piriformospora indica-inoculated)							Hordeum vulgare L.	Ghabooli et al.,2013
					2-cys peroxiredoxin-like protein		gi|47027073	↑(no irrigation,7d)							Medicago sativa L.	Aranjuelo et al., 2011
					2-cys peroxiredoxin-like protein		gi|47027073								Quercus ilex	Valero-Galvan et al.,2013
					2-cys peroxiredoxin bas1		gi|149390991	↓(not irrigation, 28d, GSE)							Quercus ilex	Valero-Galvan et al.,2013
					2-Cys peroxiredoxin BAS1, chloroplast precursor		gi|2829687	↓(25% soil water, NT)							Agrostis stolonifera	Merewitz et al., 2011
					2-Cysteine peroxiredoxin B	TC278554		↓(drought, 5d, Kukri)↓(drought, 5d, RAC875)	↓(drought, 14d, Kukri)	↓(drought, 24d, Excalibur)	↑(rewater, 25d, Excalibur)				Triticum aestivum L.	Ford et al., 2011
					2-Cys peroxiredoxin BAS1		gi|2499477	↑(20-25% SRWC, 3d)	↑(35-40% SRWC, 2d+20-25% SRWC, 3d)	—					Triticum aestivum L.	Wang et al., 2014
					2-cys peroxiredoxin, putative		gi|223530313			↑(rewater,7d)					Populus tremulaL.×P. albaL.	Durand et al.,2011
					Putative thioredoxin peroxidase		gi|115444771	↓(50 % water lost daily, 20 d)							Upland Oryza sativa L.	Rabello et al.,2014
					Thioredoxin peroxidase		gi|285265977	↓(35% soil water, 7d)							Populus tremula L. × P. alba L.-clone INRA 717–1-B4	Bohler,et al., 2013
					Putative thioredoxin peroxidase (2-Cys peroxiredoxin)	77552402					↑(30% relative humidity, 120h)			↑(30% relative humidity, 192h)	Oryza sativa L.	Pandey et al.,2010
					Putative thioredoxin peroxidase (2-Cys peroxiredoxin)	67904930					↑(30% relative humidity, 120h)	↑(30% relative humidity, 144h)	↑(30% relative humidity, 168h)		Oryza sativa L.	Pandey et al.,2010
					Putative thioredoxin peroxidase (2-Cys peroxiredoxin)	67904930				↑(30% relative humidity, 96h)	↑(30% relative humidity, 120h)	↑(30% relative humidity, 144h)	↑(30% relative humidity, 168h)	↑(30% relative humidity, 192h)	Oryza sativa L.	Pandey et al.,2010
					Putative thioredoxin peroxidase (2-Cys peroxiredoxin)	67904930		↑(30% relative humidity, 48h)	↑(30% relative humidity, 72h)	↑(30% relative humidity, 96h)	↑(30% relative humidity, 120h)	↑(30% relative humidity, 144h)	↑(30% relative humidity, 168h)		Oryza sativa L.	Pandey et al.,2010
					Putative thioredoxin peroxidase (2-Cys peroxiredoxin)	67904930		↑(30% relative humidity, 48h)	↑(30% relative humidity, 72h)	↑(30% relative humidity, 96h)					Oryza sativa L.	Pandey et al.,2010
					2-Cys peroxiredoxin BAS1, chloroplastic	AT3G11630				↑(no watering, 10d)					Brassica napus	Koh et al., 2015
					2-Cys peroxiredoxin BAS1-like, chloroplastic	AT5G06290			↑(no watering, 7d)	↑(no watering, 10d)	↑(no watering, 14d)				Brassica napus	Koh et al., 2015
	Thioredoxin	Trx	20		Thiol-specific antioxidant protein (precursor)		gi|2829687	↑( PEG6000, 48h)							Triticum aestivum L.	Zhang et al.,2014
					Thioredoxin M-type, chloroplastic		gi|11135474	↑( PEG6000, 48h)							Triticum aestivum L.	Zhang et al.,2014
					Thioredoxin H		gi|27461140	↑( PEG6000, 48h)							Triticum aestivum L.	Zhang et al.,2014
					Thioredoxin H-type		gi|11135126	↑( PEG6000, 48h)							Triticum aestivum L.	Zhang et al.,2014
					Thioredoxin family Trp26-like protein		gi|57900426	↑(withholding irrigation, 15d, Tifway)	↑(withholding irrigation, 15d, C299)						Cynodon dactylon L. Pers. ×Cynodon transvaalensis Burtt Davy, cv. Tifway,Cynodon dactylon L.	Zhao et al., 2011
					Thioredoxin M	4138290		↑(30% relative humidity, 48h)	↑(30% relative humidity, 72h)	↑(30% relative humidity, 96h)	↑(30% relative humidity, 120h)			↑(30% relative humidity, 192h)	Oryza sativa L.	Pandey et al.,2010
					Probable thioredoxin h	1930072		↑(30% relative humidity, 48h)		↑(30% relative humidity, 96h)	↑(30% relative humidity, 120h)	↑(30% relative humidity, 144h)	↑(30% relative humidity, 168h)		Oryza sativa L.	Pandey et al.,2010
					Probable thioredoxin h	1930072		↑(30% relative humidity, 48h)	↑(30% relative humidity, 72h)	↑(30% relative humidity, 96h)	↑(30% relative humidity, 120h)	↑(30% relative humidity, 144h)	↑(30% relative humidity, 168h)	↑(30% relative humidity, 192h)	Oryza sativa L.	Pandey et al.,2010
					Thioredoxin-like protein AtACHT2a		gi|14423392	↑(no irrgation, 3d)							Citrullus lanatus	Akashi et al., 2011
					Thioredoxin fold		gi|115187464	↑(no irrigation, 17d, Tiber)							Phaseolus vulgaris	Zadraznik et al.,2013
					Thioredoxin M-type	TC281848		↓(drought, 5d, RAC875)	↓(drought, 14d, Excalibur)	↓(drought, 24d, Excalibur)↓(drought, 24d, RAC875)					Triticum aestivum L.	Ford et al., 2011
					Thioredoxin, putative, expresse			↓(stop irrigation 35d,481-B,tolerant)							Oryza sativa L.	Raorane et al., 2015
					Thioredoxin, putative, expresse			↓(stop irrigation 35d,482-B,tolerant)							Oryza sativa L.	Raorane et al., 2015
					Thioredoxin, putative, expresse			↓(stop irrigation 35d,483-B,tolerant)							Oryza sativa L.	Raorane et al., 2015
					Thioredoxin, putative, expressed			↓(stop irrigation 35d,484-B,tolerant)							Oryza sativa L.	Raorane et al., 2015
					thioredoxin chloroplastic	AT1G50320			↑(no watering, 7d)	↓(no watering, 10d)					Brassica napus	Koh et al., 2015
					thioredoxin f-type 1	AT3G02730			↑(no watering, 7d)		↑(no watering, 14d)				Brassica napus	Koh et al., 2015
					thioredoxin h3	AT5G42980			↓(no watering, 7d)						Brassica napus	Koh et al., 2015
					thioredoxin m4	AT3G15360			↓(no watering, 7d)		↑(no watering, 14d)				Brassica napus	Koh et al., 2015
					m-type thioredoxin	AT4G03520		↑(no watering, 3d)	↑(no watering, 7d)						Brassica napus	Koh et al., 2015
	Methionine sulfoxide reductase	MSR	1		Methionine sulfoxide reductase A (MsrA)即Methionine-S-oxide reductase		gi|42795445	↑(soil water potential -1.5 MPa, 4d)	↑(soil water potential -3.0 MPa, 7d)						Populus ×euramericana	He et al.,2008
	Ascorbate peroxidase	APX	24		Ascorbate peroxidase		gi|310587		↓(10% soil water content, 45d, LD)						Populus cathayana	Xiao et al.,2009
					Ascorbate peroxidase 2	AT3G09640.2		↑(45–55% field capacity, Qinguan)	=						Malus domestica Borkh.	Zhou et al., 2015
					Ascorbate peroxidase 1	AT1G07890.8		↑(45–55% field capacity, Qinguan)	↑(45–55% field capacity, Naganofuji No. 2)						Malus domestica Borkh.	Zhou et al., 2015
					Ascorbate peroxidase 1	AT1G07890.8		↑(45–55% field capacity, Qinguan)	↑(45–55% field capacity, Naganofuji No. 2)						Malus domestica Borkh.	Zhou et al., 2015
					OsAPx1—cytosolic ascorbate peroxidase encoding gene 1–8, expressed			↑(stop irrigation 35d,481-B)							Oryza sativa L.	Raorane et al., 2015
					Cytosolic ascorbate peroxidase		gi|1420938	↑(no irrigation, 17d, Tiber)							Phaseolus vulgaris	Zadraznik et al.,2013
					Cytosolic ascorbate peroxidase		gi|1420938	↑(no irrigation, 17d, Tiber)							Phaseolus vulgaris	Zadraznik et al.,2013
					L-ascorbate peroxidase 1	AT1G07890					↑(no watering, 14d)				Brassica napus	Koh et al., 2015
					Thylakoidal ascorbate peroxidase	TC277285					↑(rewater, 25d, Excalibur)				Triticum aestivum L.	Ford et al., 2011
					Probable L-ascorbate peroxidase 6, chloroplastic	P0C0L1		↑(25% field capacity, 28d, Piriformospora indica-inoculated)							Hordeum vulgare L.	Ghabooli et al.,2013
					L-ascorbate peroxidase, chloroplastic			↓(not irrigation, 10d, Brilliant,sensitive)	↑(not irrigation, 15d, Brilliant,sensitive)						Kentucky Bluegrass	Xu et al.,2010
					Thylakoid-bound ascorbate peroxidase APx8	NP_001149509.1	gi|149108022	↓(12.5% soil water, 6d, 2023,sensitive)↑(12.5% soil water, 6d, CE704,tolerant)							Zea mays L.	Benesova et al. 2012
					Ascorbate peroxidase; peroxisome				↓(not irrigation, 15d, Brilliant,sensitive)						Kentucky Bluegrass	Xu et al.,2010
					stromal ascorbate peroxidase (APX)	AT4G08390				↑(no watering, 10d)					Brassica napus	Koh et al., 2015
					Ascorbate peroxidase 4	TC334642				↑(drought, 24d, Kukri)					Triticum aestivum L.	Ford et al., 2011
					Ascorbate peroxidase		gi|24636598		↑(10% soil water content, 45d, LD)						Populus cathayana	Xiao et al.,2009
					Ascorbate peroxidase		gi|115452337	↑(50 % water lost daily, 20 d)							Upland Oryza sativa L.	Rabello et al.,2014
					Ascorbate peroxidase		gi|56412205	↑(withholding irrigation, 15d, Tifway)							Cynodon dactylon L. Pers. ×Cynodon transvaalensis Burtt Davy, cv. Tifway,Cynodon dactylon L.	Zhao et al., 2011
					Ascorbate peroxidase	AAD20022.1		↑(10% PEG6000, 4d)	↑(drought,4d)						Glycine max L.	Mohammadi et al., 2012
					Ascorbate peroxidase		gi|226897533	↑( PEG6000, 48h)							Triticum aestivum L.	Zhang et al.,2014
					Ascorbate peroxidase		gi|226897533	—	↑(35-40% SRWC, 2d+20-25% SRWC, 3d)	↑(35-40% SRWC, 7-9d+35-40% SRWC, 7-9d+20-25% SRWC, 8d)					Triticum aestivum L.	Wang et al., 2014
					L-ascorbate peroxidase	1321661		↑(30% relative humidity, 48h)	↑(30% relative humidity, 72h)	↑(30% relative humidity, 96h)	↑(30% relative humidity, 120h)	↑(30% relative humidity, 144h)	↑(30% relative humidity, 168h)	↑(30% relative humidity, 192h)	Oryza sativa L.	Pandey et al.,2010
					Possible: ascorbate peroxidase		gi|555576		↓(25% soil water, SAG12-ipt)						Agrostis stolonifera	Merewitz et al., 2011
					APx1 - Cytosolic Ascorbate Peroxidase	B6UB73		↑（withholding water, 9 d）							Zea mays	Sanggon et al., 2015
	Dehydroascorbate reductase	DHAR	15		Dehydroascorbate reductase		gi|50058092	↑(no irrigation,7d)							Medicago sativa L.	Aranjuelo et al., 2011
					Dehydroascorbate reductase		gi|255564070	↑(no irrigation, 107d)							Cistus albidus	Brossa et al., 2015
					Dehydroascorbate reductase		gi|28192425	↑(withholding irrigation, 15d, Tifway)							Cynodon dactylon L. Pers. ×Cynodon transvaalensis Burtt Davy, cv. Tifway,Cynodon dactylon L.	Zhao et al., 2011
					Dehydroascorbate reductase		gi|28192421	↑(withholding irrigation, 15d, Tifway)							Cynodon dactylon L. Pers. ×Cynodon transvaalensis Burtt Davy, cv. Tifway,Cynodon dactylon L.	Zhao et al., 2011
					Dehydroascorbate reductase		gi|28192421	↑(withholding irrigation, 15d, Tifway)							Cynodon dactylon L. Pers. ×Cynodon transvaalensis Burtt Davy, cv. Tifway,Cynodon dactylon L.	Zhao et al., 2011
					Dehydroascorbate reductase	AAL71854		↑(33% ﬁeld capacity)							Triticum aestivum L.grass (Elymus elongatum)	Gazanchian et al., 2007
					Dehydroascorbate reductase 2	TC278630				↑(drought, 24d, Excalibur)↑(drought, 24d, Kukri)					Triticum aestivum L.	Ford et al., 2011
					GSH-dependent dehydroascorbate reductase 1	6939839		↑(30% relative humidity, 48h)	↑(30% relative humidity, 72h)	↑(30% relative humidity, 96h)	↑(30% relative humidity, 120h)	↑(30% relative humidity, 144h)	↑(30% relative humidity, 168h)	↑(30% relative humidity, 192h)	Oryza sativa L.	Pandey et al.,2010
					GSH-dependent dehydroascorbate reductase 1		gi|6939839	↑(50 % water lost daily, 20 d)							Upland Oryza sativa L.	Rabello et al.,2014
					GSH-dependent dehydroascorbate reductase	BAA90672			↑(withhold water 43d, CT9993)						Oryza sativa L.	Salekdeh et al., 2002
					Putative dehydroascorbate reductase		gi|115467258	↓(50 % water lost daily, 20 d)							Upland Oryza sativa L.	Rabello et al.,2014
					Dehydroascorbate reductase 2	AT1G75270.1		=	↑(45–55% field capacity, Naganofuji No. 2)						Malus domestica Borkh.	Zhou et al., 2015
					Dehydroascorbate reductase 2	AT1G75270.1		=	↑(45–55% field capacity, Naganofuji No. 2)						Malus domestica Borkh.	Zhou et al., 2015
					dehydroascorbate reductase	AT1G19570		↑(no watering, 3d)	↑(no watering, 7d)	↑(no watering, 10d)	↑(no watering, 14d)				Brassica napus	Koh et al., 2015
					Dehydroascorbate reductase	Q84UH5		↑（no irrigation, 20 d）							Oryza sativa L.	Ji et al., 2012
	monodehydroascorbate reductase	MDHAR	7		monodehydroascorbate reductase	AT3G52880				↑(no watering, 10d)					Brassica napus	Koh et al., 2015
					Putative monodehydroascorbate reductase	52077207		↑(30% relative humidity, 48h)	↑(30% relative humidity, 72h)	↑(30% relative humidity, 96h)	↑(30% relative humidity, 120h)	↑(30% relative humidity, 144h)	↑(30% relative humidity, 168h)	↑(30% relative humidity, 192h)	Oryza sativa L.	Pandey et al.,2010
					Putative monodehydroascorbate reductase		gi|37806239	↑(withholding irrigation, 15d, Tifway)	↑(withholding irrigation, 15d, C299)						Cynodon dactylon L. Pers. ×Cynodon transvaalensis Burtt Davy, cv. Tifway,Cynodon dactylon L.	Zhao et al., 2011
					Monodehydroascorbate reductase	AT3G52880.1		↑(45–55% field capacity, Qinguan)	=						Malus domestica Borkh.	Zhou et al., 2015
					Cytosolic monodehydroascorbate reductase	4666287		↓(30% relative water content)							Sporobolus stapﬁanus	Oliver et al.,2011
					Cytosolic monodehydroascorbate reductase	4666287		↓(30% relative water content)							Sporobolus stapﬁanus	Oliver et al.,2011
					Cytosolic monodehydroascorbate reductase				↓(drought, 15d)						Poa pratensis L.	Xu amd Huang, 2012
	Glutathione reductase	GR	2		Glutathione reductase			↑(0.21 M sorbitol, 48d)							Banana	Vanhove et al., 2012
					Glutathione reductase, chloroplastic	AT3G54660				↓(no watering, 10d)	↑(no watering, 14d)				Brassica napus	Koh et al., 2015
	NADP-dependent malic enzyme	——	2		NADP-dependent malic enzyme	gb|EU975279.1|	gi|148970199	↑(12.5% soil water, 6d, 2023)↑(12.5% soil water, 6d, CE704)							Zea mays L.	Benesova et al. 2012
					NADP-dependent malic enzyme (CAM)		gi|209405432		↑(10 % ﬁeld capacity, 5d, # 15163)						Hordeum vulgare L.	Ashoub et al., 2013
	GDP-D-mannose-3',5'-epimerase	GME	2		GDP-D-mannose-3′,5′-epimerase (GME)	A0EJL8				↓(no irrigation, 86d)					Populus deltoides×Populus nigra	Bonhomme et al.,2009
					GDP-mannose 3,5-epimerase	AT5G28840.2		↑(45–55% field capacity, Qinguan)	=						Malus domestica Borkh.	Zhou et al., 2015
	Ascorbate	AsA	2		Ascorbate			↓(45–55% field capacity, Qinguan，tolerant)	=						Malus domestica Borkh.	Zhou et al., 2015
					Ascorbate			=	↑(45–55% field capacity, Naganofuji No. 2,sensitive)						Malus domestica Borkh.	Zhou et al., 2015
	Glutathione peroxidase	GPX	4		Glutathione peroxidase-like protein	AJ238744		↑(50% relative humidity, 0.5h)	↑(50% relative humidity, 8h)	↑(50% relative humidity, 48h)		↑(rewater, 48h)			Boea hygrometrica	Jiang et al.,2007
					Glutathione peroxidase-like protein	CAB59893		↑(31% ﬁeld capacity)							Triticum aestivum L.grass (Elymus elongatum)	Gazanchian et al., 2007
					glutathione peroxidase	AT2G25080				↓(no watering, 10d)	↑(no watering, 14d)				Brassica napus	Koh et al., 2015
					glutathione peroxidase 6	AT4G11600			↑(no watering, 7d)	↑(no watering, 10d)					Brassica napus	Koh et al., 2015
	Phospholipid hydroperoxide glutathione peroxidase	PHGPX	2		Phospholipid hydroperoxide glutathione peroxidase		gi|2760606	↑(no irrgation, 3d)							Citrullus lanatus	Akashi et al., 2011
					Phospholipid hydroperoxide glutathione peroxidase		gi|20138151	↑(no irrgation, 3d)							Citrullus lanatus	Akashi et al., 2011
	Glutathione S-transferase	GST	24		2,4-D inducible glutathione S-transferase (EC 2.5.1.18)	O49235		↑(25% field capacity, 18d)							Populus deltoides×Populus nigra	Bonhomme et al.,2009
					Glutathione S-transferase (EC 2.5.1.18)	O49235		↓(25% field capacity, 18d)							Populus deltoides×Populus nigra	Bonhomme et al.,2009
					DHAR class glutathione transferase DHAR3	ADB11345.1		↑(drought,4d)							Glycine max L.	Mohammadi et al., 2012
					Glutathione transferase F5	CAD29478		↑(29% ﬁeld capacity)							Triticum aestivum L.grass (Elymus elongatum)	Gazanchian et al., 2007
					Glutathione transferase	gi|18479038		↑(not irrigation, 9d, TR)↑(not irrigation, 9d, TTD)↑(not irrigation, 9d, Kn)							Triticum aestivum L.	Budak et al.,2013
					Glutathione-S-transferase		gi|5923877	↑( PEG6000, 48h)							Triticum aestivum L.	Zhang et al.,2014
					ATGSTU6 (glutathione S-transferase 24)		gi|15227084			↑(50% relative humidity, 48h)	↑(rewater, 8h)				Boea hygrometrica	Jiang et al., 2007
					Glutathione S transferase			↑(0.21 M sorbitol, 48d)							Banana	Vanhove et al., 2012
					Glutathione S-transferase		gi|416652	↑(no irrgation, 3d)							Citrullus lanatus	Akashi et al., 2011
					Glutathione S-transferase I		gi|168489	↑(12.5% soil water, 6d, 2023)↑(12.5% soil water, 6d, CE704)							Zea mays L.	Benesova et al. 2012
					Glutathione-S-transferase			↑(not irrigation, 10d, Brilliant)	↑(not irrigation, 15d, Brilliant)						Kentucky Bluegrass	Xu et al.,2010
					Glutathione-S-transferase, I subunit		gi|21212950								Poa pratensis L.	Xu amd Huang, 2012
					Probable glutathione S-transferase			↑(35% RWC)							Gossypium herbaceum L.	Deeba et al., 2012
					Predicted protein/ Hordeum vulgare ssp. vulgare homologous to glutathione S-transferase/ Pisum sativum		gi|326507956	↑(withhold water to −2.5 Mpa soil water potential, 3 week)							Hordeum spontaneum	Ashoub et al., 2015
					Putative glutathione S-transferase		gi|21217741	↑(no irrigation, 17d, Starozagorski)							Phaseolus vulgaris	Zadraznik et al.,2013
					Glutathione-S-transferase (GST)			↓(25% soil water, NT)							Agrostis stolonifera	Merewitz et al., 2011
					glutathione s-transferase	AT2G29450		↑(no watering, 3d)		↑(no watering, 10d)					Brassica napus	Koh et al., 2015
					glutathione s-transferase dhar3	AT5G16710			↑(no watering, 7d)	↓(no watering, 10d)					Brassica napus	Koh et al., 2015
					glutathione s-transferase phi 9	AT2G30860				↑(no watering, 10d)					Brassica napus	Koh et al., 2015
					glutathione s-transferase tau 20	AT1G78370			↑(no watering, 7d)		↓(no watering, 14d)				Brassica napus	Koh et al., 2015
					glutathione s-transferase u19-like	AT1G78380				↑(no watering, 10d)	↑(no watering, 14d)				Brassica napus	Koh et al., 2015
					glutathione s-transferase tau 5	AT2G29450		↑(no watering, 3d)	↑(no watering, 7d)	↓(no watering, 10d)					Brassica napus	Koh et al., 2015
					glutathione s-transferase l3	AT5G02790		↑(no watering, 3d)	↑(no watering, 7d)		↓(no watering, 14d)				Brassica napus	Koh et al., 2015
					Glutathione S-transferase	P12653		↑（withholding water, 9 d）							Zea mays	Sanggon et al., 2015
	Glutaredoxin	Grx	2		Glutaredoxin subgroup II (Grx_S17)	gb|EU964593.1|	gi|148962941	↑(12.5% soil water, 6d, 2023)↑(12.5% soil water, 6d, CE704)							Zea mays L.	Benesova et al. 2012
					glutaredoxin-C5	AT4G28730			↓(no watering, 7d)	↓(no watering, 10d)	↑(no watering, 14d)				Brassica napus	Koh et al., 2015
	Monothiol glutaredoxin	——	1		monothiol glutaredoxin- chloroplastic	AT2G38270					↑(no watering, 14d)				Brassica napus	Koh et al., 2015
	Glutamate-cysteine ligase	GCL	1		gamma-glutamylcysteine synthetase又名Glutamate–cysteine ligase	AT4G23100				↑(no watering, 10d)					Brassica napus	Koh et al., 2015
	Glyoxalase	GLO	10		Hydroxyacylglutathione hydrolase (glyoxalase II)		gi|71534880	↑(no irrigation, 17d, Starozagorski)							Phaseolus vulgaris	Zadraznik et al.,2013
					Glyoxalase I	TC282953		↓(drought, 5d, RAC875)	↓(drought, 14d, Kukri)↑(drought, 14d, RAC875)						Triticum aestivum L.	Ford et al., 2011
					Putative glyoxalase I	50252391			↓(30% relative humidity, 72h)	↓(30% relative humidity, 96h)		↓(30% relative humidity, 144h)	↓(30% relative humidity, 168h)		Oryza sativa L.	Pandey et al.,2010
					Predicted protein/ Hordeum vulgare ssp. vulgare homologous to putative lactoylglutathione lyase		gi|326514324	↑(withhold water to −2.5 Mpa soil water potential, 3 week)							Hordeum spontaneum	Ashoub et al., 2015
					Lactoylglutathione lyase		gi|211906514	↑(no irrigation, 107d)							Cistus albidus	Brossa et al., 2015
					Lactoylglutathione lyase		gi|2213425	↑(no irrgation, 3d)							Citrullus lanatus	Akashi et al., 2011
					Lactoylglutathione lyase	AT1G11840		↑(no watering, 3d)	↓(no watering, 7d)		↓(no watering, 14d)				Brassica napus	Koh et al., 2015
					Lactoylglutathione lyase glyoxalase i-like protein	AT5G48480		↑(no watering, 3d)			↑(no watering, 14d)				Brassica napus	Koh et al., 2015
					Lactoylglutathione lyase-like isoform x2	AT1G08110		↑(no watering, 3d)		↑(no watering, 10d)	↑(no watering, 14d)				Brassica napus	Koh et al., 2015
					Lactoylglutathione lyase	B6TPH0		↑（withholding water, 9 d）							Zea mays	Sanggon et al., 2015
	Aldehyde dehydrogenase	ALDH	3		Aldehyde dehydrogenase family 2 member B7 (EC 1.2.1.3)	Q8S528				↓(no irrigation, 86d)					Populus deltoides×Populus nigra	Bonhomme et al.,2009
					Aldehyde dehydrogenase	TC284017			↑(drought, 14d, RAC875)	↑(drought, 24d, RAC875)	↑(rewater, 25d, Excalibur)↑(rewater, 25d, RAC875)				Triticum aestivum L.	Ford et al., 2011
					Aldehyde dehydrogenase, putative, expressed			↑(stop irrigation 35d,481-B)			Upregulated				Oryza sativa L.	Raorane et al., 2015
	02.2 Pathogenesis-related protein (21)
	Chitinase	CHIA	8		Class I chitinase, putative		gi|223534957			↓(35% soil water, 21d)					Populus tremula L. × P. alba L.-clone INRA 717–1-B4	Bohler,et al., 2013
					Class I chitinase, putative		gi|223534957	↓(35% soil water,7d)		↓(35% soil water, 21d)					Populus tremula L. × P. alba L.-clone INRA 717–1-B4	Bohler,et al., 2013
					Basic endochitinase	P51613		↑(dry season, 6 month)							Eucalyptus	Bedon et al., 2012
					Basic endochitinase	Q9FRV1		↑(dry season, 6 month)							Eucalyptus	Bedon et al., 2012
					Basic endochitinase	P51613		↑(dry season, 6 month)							Eucalyptus	Bedon et al., 2012
					Basic endochitinase	P51613		↑(dry season, 6 month)							Eucalyptus	Bedon et al., 2012
					Basic endochitinase	P51613		↑(dry season, 6 month)							Eucalyptus	Bedon et al., 2012
					Acidic chitinase			↑(0.21 M sorbitol, 48d)							Banana	Vanhove et al., 2012
	Disease resistance protein	DRP	7		Disease resistance protein family protein	115485283		↓(30% relative water content)							Sporobolus stapﬁanus	Oliver et al.,2011
					Disease resistance response protein 206	NP_001148909.1	gi|148975107	↑(12.5% soil water, 6d, 2023)↑(12.5% soil water, 6d, CE704)							Zea mays L.	Benesova et al. 2012
					Disease resistance-like protein		gi|71363579	↑(10% soil water content, 45d, HY)							Populus cathayana	Xiao et al.,2009
					TIR-NBS-LRR-TIR type disease resistance protein		gi|105922786	↑( PEG6000, 48h)							Triticum aestivum L.	Zhang et al.,2014
					Truncated disease resistance protein RPP13 variant		gi|93211073	↑(10% soil water content, 45d, HY)	↑(10% soil water content, 45d, LD)						Populus cathayana	Xiao et al.,2009
					Pathogenesis-related protein 1	B6SXF5		↑（withholding water, 9 d）							Zea mays	Sanggon et al., 2015
					TPA: pathogeneis protein 10	D4HR93		↑（withholding water, 9 d）							Zea mays	Sanggon et al., 2015
	Disease resistance gene analog PIC15	——	1		Disease resistance gene analog PIC15		gi|3982622	↓(12.5% soil water, 6d, 2023)↑(12.5% soil water, 6d, CE704)							Zea mays L.	Benesova et al. 2012
	Polyphenol oxidase	PPO	2		Polyphenol oxidase precursor		gi|22729	↑(50% relative humidity, 0.5h)	↑(50% relative humidity, 8h)	↑(50% relative humidity, 48h)	↑(rewater, 8h)	↑(rewater, 48h)			Boea hygrometrica	Jiang et al., 2007
					Polyphenol oxidase			↑(35% RWC)							Gossypium herbaceum L.	Deeba et al., 2012
	PR10	PR10	1		Pathogen defense related proteins (PR10)			↑(0.21 M sorbitol, 48d)							Banana	Vanhove et al., 2012
	Oryzacystain	OC	2		Oryzacystain	1280613		↑(30% relative humidity, 48h)		↑(30% relative humidity, 96h)	↓(30% relative humidity, 120h)	↓(30% relative humidity, 144h)	↓(30% relative humidity, 168h)	↑(30% relative humidity, 192h)	Oryza sativa L.	Pandey et al.,2010
					Oryzain alpha chain precursor	115460974					↑(30% relative humidity, 120h)	↑(30% relative humidity, 144h)	↑(30% relative humidity, 168h)		Oryza sativa L.	Pandey et al.,2010
	02.3 Osmotic homostasis (18)
	Betaine aldehyde dehydrogenase	BADH	3		Betaine aldehyde dehydrogenase		gi|15147871		↑(10 % ﬁeld capacity, 5d, # 15163)						Hordeum vulgare L.	Ashoub et al., 2013
					Betaine aldehyde dehydrogenase		gi|15147871		↑(10 % ﬁeld capacity, 5d, # 15163)						Hordeum vulgare L.	Ashoub et al., 2013
					Betaine aldehyde dehydrogenase		gi|15147871	↑(withhold water to −2.5 Mpa soil water potential, 3 week)							Hordeum spontaneum	Ashoub et al., 2015
	Late embryogenesis abundant protein	LEA protein	2		LEA (late embryogenesis abundant) protein group3		gi|162463970	↑(12.5% soil water, 6d, 2023)↑(12.5% soil water, 6d, CE704)							Zea mays L.	Benesova et al. 2012
					Late embryogenesis abundant group 2	AT2G44060		3d	↓(no watering, 7d)	↑(no watering, 10d)	↑(no watering, 14d)				Brassica napus	Koh et al., 2015
	Dehydrin	DHN	13		Dehydrin		gi|162461133	↑(12.5% soil water, 6d, 2023)↑(12.5% soil water, 6d, CE704)							Zea mays L.	Benesova et al. 2012
					Dehydrin		gi|1399913	↑(withholding irrigation, 15d, Tifway)	↑(withholding irrigation, 15d, C299)						Cynodon dactylon L. Pers. ×Cynodon transvaalensis Burtt Davy, cv. Tifway,Cynodon dactylon L.	Zhao et al., 2011
					Dehydrin		gi|18964	↑(withholding irrigation, 15d, Tifway)	↑(withholding irrigation, 15d, C299)						Cynodon dactylon L. Pers. ×Cynodon transvaalensis Burtt Davy, cv. Tifway,Cynodon dactylon L.	Zhao et al., 2011
					Dehydrin		gi|1399913	↑(withholding irrigation, 15d, Tifway)	↑(withholding irrigation, 15d, C299)						Cynodon dactylon L. Pers. ×Cynodon transvaalensis Burtt Davy, cv. Tifway,Cynodon dactylon L.	Zhao et al., 2011
					Dehydrin		gi|6358640	↑(no irrigation, 17d, Starozagorski)							Phaseolus vulgaris	Zadraznik et al.,2013
					Dehydrin 13	ACG47851.1	gi|111990620	↑(12.5% soil water, 6d, 2023)↑(12.5% soil water, 6d, CE704)							Zea mays L.	Benesova et al. 2012
					Dehydrin COR410	gb|EU955536.1|	gi|101398743	↑(12.5% soil water, 6d, 2023)↑(12.5% soil water, 6d, CE704)							Zea mays L.	Benesova et al. 2012
					Dehydrin COR410	gb|EU966442.1|	gi|91875531	↑(12.5% soil water, 6d, 2023)↑(12.5% soil water, 6d, CE704)							Zea mays L.	Benesova et al. 2012
					Dehydrin COR410	TC277300		↑(drought, 5d, Excalibur)↑(drought, 5d, Kukri)↑(drought, 5d, RAC875)	↑(drought, 14d, Excalibur)↑(drought, 14d, Kukri)↑(drought, 14d, RAC875)	↑(drought, 24d, Excalibur)↑(drought, 24d, Kukri)↑(drought, 24d, RAC875)	↑(rewater, 25d, Excalibur)↑(rewater, 25d, Kukri)↑(rewater, 25d, RAC875)				Triticum aestivum L.	Ford et al., 2011
					Dehydrin RAB-17	CAM56275.1	gi|149074542	↑(12.5% soil water, 6d, 2023)↑(12.5% soil water, 6d, CE704)							Zea mays L.	Benesova et al. 2012
					Dehydrin RAB-17		gi|239236	↑(12.5% soil water, 6d, 2023)↑(12.5% soil water, 6d, CE704)							Zea mays L.	Benesova et al. 2012
					Dehydrin erd10	AT1G20450		↑(no watering, 3d)	↑(no watering, 7d)	↑(no watering, 10d)					Brassica napus	Koh et al., 2015
					Dehydrin erd14-like	AT1G76180				↑(no watering, 10d)					Brassica napus	Koh et al., 2015
	02.4 Other stress responsive protein (49)
	Cold regulated protein	——	4		Cold acclimation protein WCOR615	TC285540		↑(drought, 5d, RAC875)	↓(drought, 14d, RAC875)		↓(rewater, 25d, Excalibur)↑(rewater, 25d, RAC875)				Triticum aestivum L.	Ford et al., 2011
					Cold regulated protein (putative phosphatidylethanolamine binding protein)	AAT47009.1	gi|113702333	↑(12.5% soil water, 6d, 2023)↑(12.5% soil water, 6d, CE704)							Zea mays L.	Benesova et al. 2012
					Cold-responsive LEA/RAB-related COR protein	TC283438		↑(drought, 5d, RAC875)	↑(drought, 14d, Kukri)	↑(drought, 24d, Kukri)					Triticum aestivum L.	Ford et al., 2011
					Cold regulated protein	gi|26017213		↑(not irrigation, 9d, TTD)							Triticum aestivum L.	Budak et al.,2013
	Stress responsive protein	——	3		Stress responsive protein	gb|EU963681.1|	gi|149004618	↑(12.5% soil water, 6d, 2023)↑(12.5% soil water, 6d, CE704)							Zea mays L.	Benesova et al. 2012
					Stress responsive protein	NP_001149550.1	gi|149112757	↑(12.5% soil water, 6d, 2023)↑(12.5% soil water, 6d, CE704)							Zea mays L.	Benesova et al. 2012
					Stress responsive protein	gb|EU963681.1|	gi|149100074	↑(12.5% soil water, 6d, 2023)↑(12.5% soil water, 6d, CE704)							Zea mays L.	Benesova et al. 2012
	Temperature stress-induced lipocalin	TIL	2		Temperature stress-induced lipocalin		gi|18650668	↑(withholding irrigation, 15d, Tifway)							Cynodon dactylon L. Pers. ×Cynodon transvaalensis Burtt Davy, cv. Tifway,Cynodon dactylon L.	Zhao et al., 2011
					Putative temperature stress-induced lipocalin		gi|42408683	↑(withholding irrigation, 15d, Tifway)	↑(withholding irrigation, 15d, C299)						Cynodon dactylon L. Pers. ×Cynodon transvaalensis Burtt Davy, cv. Tifway,Cynodon dactylon L.	Zhao et al., 2011
	Alpha-NAC protein	——	1		Alpha-NAC protein	115450389		↑(30% relative water content)							Sporobolus stapﬁanus	Oliver et al.,2011
	I2 (defense response)	——	1		I2 (defense response)		gi|77641376		↑(10% soil water content, 45d, LD)						Populus cathayana	Xiao et al.,2009
	Early responsive to dehydration	ERD4	2		ERD4 protein (early responsive to dehydration)	gb|EU348754.1|	gi|149085052	↑(12.5% soil water, 6d, 2023)↑(12.5% soil water, 6d, CE704)							Zea mays L.	Benesova et al. 2012
					Esi-2 (early salt stress and cold acclimation-induced protein 2)	AAY16798.1	gi|91054543	↑(12.5% soil water, 6d, 2023)↑(12.5% soil water, 6d, CE704)							Zea mays L.	Benesova et al. 2012
	Cytochrome P450	CYP450	3		C71AJ; Cytochrome P450 71A19	Q9T0K0		↓(1/3 of field capacity, 14h, Wild)↓(1/3 of field capacity, 14h, Mutant)							Triticum aestivum L.	Peremarti et al.,2014
					Cytochrome P450	108707973		↑(stop watering, 7d, GP)↑(stop watering, 7d, B)							Hordeum vulgare L.	Wendelboe-Nelson et al., 2010
					Cytochrome P450 90D2			↑(35% RWC)							Gossypium herbaceum L.	Deeba et al., 2012
	Drought-induced stress protein	——	3		CDSP32 (chloroplastic drought-induced stress protein of 32KDa)	TC294367			↑(drought, 14d, Excalibur)						Triticum aestivum L.	Ford et al., 2011
					Drought inducible 22 kDa protein		gi|15667623	↑(10% PEG 6000, 14h)							Saccharum officinarum	Zhou et al.,2012
					Drought-induced protein SDi-6	TC292060		↑(drought, 5d, Excalibur)↑(drought, 5d, Kukri)↑(drought, 5d, RAC875)	↑(drought, 14d, Excalibur)↑(drought, 14d, Kukri)	↑(drought, 24d, Excalibur)↑(drought, 24d, Kukri)↑(drought, 24d, RAC875)	↓(rewater, 25d, Excalibur)↑(rewater, 25d, Kukri)↑(rewater, 25d, RAC875)				Triticum aestivum L.	Ford et al., 2011
	Post-illumination chlorophyll fluorescence increase protein (PIFI)	PIFI	1		Chloroplast post-illumination chlorophyll fluorescence increase protein (PIFI)	gb|DQ854728.1|	gi|149082373	↓(12.5% soil water, 6d, 2023)↓(12.5% soil water, 6d, CE704)							Zea mays L.	Benesova et al. 2012
	Germin-like protein	GLP	6		GER3 (germin 3)	TC287783			↓(drought, 14d, Excalibur)↓(drought, 5d, RAC875)	↓(drought, 24d, RAC875)	↓(rewater, 25d, Excalibur)↓(rewater, 25d, RAC875)				Triticum aestivum L.	Ford et al., 2011
					Germin-like protein	115476760		↑(30% relative water content)							Sporobolus stapﬁanus	Oliver et al.,2011
					Germin-like protein		gi|42408420	↑(withholding irrigation, 15d, Tifway)							Cynodon dactylon L. Pers. ×Cynodon transvaalensis Burtt Davy, cv. Tifway,Cynodon dactylon L.	Zhao et al., 2011
					Putative germin-like protein		gi|75261354	↑(50 % water lost daily, 20 d)							Upland Oryza sativa L.	Rabello et al.,2014
					Germin-like protein		gi|157058854			↑(rewater,7d)					Populus tremulaL.×P. albaL.	Durand et al.,2011
					Germin-like protein		gi|11134054			↓(rewater,7d)					Populus tremulaL.×P. albaL.	Durand et al.,2011
	Short-chain dehydrogenase/reductase	DHRS	1		Putative short-chain dehydrogenase/reductase (SDR)		gi|50508677		↓(withholding irrigation, 15d, C299)						Cynodon dactylon L. Pers. ×Cynodon transvaalensis Burtt Davy, cv. Tifway,Cynodon dactylon L.	Zhao et al., 2011
	Silverleaf whitelfly-induced protein 1	——	1		Putative silverleaf whitelfly-induced protein 1	41053258		↑(30% relative humidity, 48h)	↑(30% relative humidity, 72h)	↑(30% relative humidity, 96h)	↑(30% relative humidity, 120h)	↑(30% relative humidity, 144h)	↑(30% relative humidity, 168h)	↑(30% relative humidity, 192h)	Oryza sativa L.	Pandey et al.,2010
	Non-photochemical quenching	NPQ	1		Non-photochemical quenching		AT1G44575.1	↑(45–55% field capacity, Qinguan)	=						Malus domestica Borkh.	Zhou et al., 2015
	Thaumatin-like protein	Thaumatin	1		Thaumatin-like protein		gi|51091427		↓(10% soil water content, 45d, LD)						Populus cathayana	Xiao et al.,2009
	dna-damage resistance protein drt112		1		dna-damage resistance protein drt112	AT1G20340					↑(no watering, 14d)				Brassica napus	Koh et al., 2015
	ZKT protein containing PDZ, K-box and a TPR region		1		zkt protein containing k-box and a tpr region	AT1G55480			↑(no watering, 7d)	↑(no watering, 10d)					Brassica napus	Koh et al., 2015
	responsive to dessication 29B (RD29B)		1		responsive to dessication 29B (RD29B)	AT5G52300		↑(no watering, 3d)	↑(no watering, 7d)	↑(no watering, 10d)	↑(no watering, 14d)				Brassica napus	Koh et al., 2015
	protein low-temperature-induced 65		1		protein low-temperature-induced 65	AT5G52300			↓(no watering, 7d)						Brassica napus	Koh et al., 2015
	ABA responsive protein	ASR	8		ASR protein (ABA- stress- and ripening-induced protein)	ref|NM_001112764.1|	gi|148965319	↓(12.5% soil water, 6d, 2023)↑(12.5% soil water, 6d, CE704)							Zea mays L.	Benesova et al. 2012
					ASR2 protein (ABA- stress- and ripening-induced protein)	gb|EU952401.1|	gi|149070922	↑(12.5% soil water, 6d, 2023)↑(12.5% soil water, 6d, CE704)							Zea mays L.	Benesova et al. 2012
					ASR2 protein (ABA- stress- and ripening-induced protein)	gb|EU960308.1|	gi|149100400	↑(12.5% soil water, 6d, 2023)↑(12.5% soil water, 6d, CE704)							Zea mays L.	Benesova et al. 2012
					Abscisic acid- and stress-inducible protein	AAB96681		↑(26% ﬁeld capacity)							Triticum aestivum L.grass (Elymus elongatum)	Gazanchian et al., 2007
					Abscisic acid- and stress-inducible protein	AAB96681		↑(27% ﬁeld capacity)							Triticum aestivum L.grass (Elymus elongatum)	Gazanchian et al., 2007
					Abscisic acid- and stress-inducible protein	AAB96681		↑(28% ﬁeld capacity)							Triticum aestivum L.grass (Elymus elongatum)	Gazanchian et al., 2007
					Abscisic stress protein homolog (ABA1)	ref|NM_001111891.1|	gi|108954243	↑(12.5% soil water, 6d, 2023)↑(12.5% soil water, 6d, CE704)							Zea mays L.	Benesova et al. 2012
					Abscisic stress-ripening protein 2-like	gi|514787580		↑（withholding water, 9 d）							Zea mays	Sanggon et al., 2015
	Lectin	——	4		Lectin			↑(0.21 M sorbitol, 48d)							Banana	Vanhove et al., 2012
					Lectin			↑(0.21 M sorbitol, 48d)							Banana	Vanhove et al., 2012
					Lectin	ABW72645.1		↑(10% PEG6000, 4d)	↑(drought,4d)						Glycine max L.	Mohammadi et al., 2012
					Lectin	ABW72645.1		↑(10% PEG6000, 4d)							Glycine max L.	Mohammadi et al., 2012
	Formate dehydrogenase	FDH	3		Formate dehydrogenase		gi|270342112	↑(no irrigation, 17d, Starozagorski)							Phaseolus vulgaris	Zadraznik et al.,2013
					Formate dehydrogenase		gi|270342112	↑(no irrigation, 17d, Tiber)							Phaseolus vulgaris	Zadraznik et al.,2013
					Predicted protein/ Hordeum vulgare ssp. vulgare homologous to mitochondrial formate dehydrogenase/ Aegilops tauschii		gi|326507324	↑(withhold water to −2.5 Mpa soil water potential, 3 week)							Hordeum spontaneum	Ashoub et al., 2015
	03 Transcription related (48)
	High mobility group protein	HMG	2		High mobility group protein (DNA-binding)	emb|X58282.1|ZMHMGPMR	gi|148973611	↓(12.5% soil water, 6d, 2023)↑(12.5% soil water, 6d, CE704)							Zea mays L.	Benesova et al. 2012
					High mobility group protein HMGI/Y (DNA-binding)		gi|162462851	↓(12.5% soil water, 6d, 2023)↑(12.5% soil water, 6d, CE704)							Zea mays L.	Benesova et al. 2012
	Histone	——	4		Histone H1	gb|EU966609.1|	gi|149206862	↓(12.5% soil water, 6d, 2023)↑(12.5% soil water, 6d, CE704)							Zea mays L.	Benesova et al. 2012
					Histone H1-like protein		gi|162464456	↓(12.5% soil water, 6d, 2023)↑(12.5% soil water, 6d, CE704)							Zea mays L.	Benesova et al. 2012
					Histone H2B		gi|7387726	↓(no irrigation, 107d)							Cistus albidus	Brossa et al., 2015
					histone h2b	AT5G59910				↓(no watering, 10d)					Brassica napus	Koh et al., 2015
	Proliferating cell nuclear antigen	PCNA	1		Proliferating cell nuclear antigen	P17070		↓(25% field capacity, 28d, non-inoculated)↑(25% field capacity, 28d, Piriformospora indica-inoculated)							Hordeum vulgare L.	Ghabooli et al.,2013
	Nucleosome assembly protein	——	1		nucleosome assembly protein 1;2-like	AT2G19480			↓(no watering, 7d)						Brassica napus	Koh et al., 2015
	RNA polymerase	RNAP	1		RNA polymerase beta subunit	11466777		↑(30% relative water content)							Sporobolus stapﬁanus	Oliver et al.,2011
	Transcription factor	TF	8		BTF3b-like transcription factor		gi|49616929			↓(35% soil water, 21d)					Populus tremula L. × P. alba L.-clone INRA 717–1-B4	Bohler,et al., 2013
					Transcription factor btf3 homolog 4-like	AT1G73230				↓(no watering, 10d)	↑(no watering, 14d)				Brassica napus	Koh et al., 2015
					AT-hook protein 1 (DNA-binding)	gb|EU959419.1|	gi|148955887	↓(12.5% soil water, 6d, 2023)↓(12.5% soil water, 6d, CE704)							Zea mays L.	Benesova et al. 2012
					Hox2b protein (DNA-binding)		gi|162464040	↓(12.5% soil water, 6d, 2023)↑(12.5% soil water, 6d, CE704)							Zea mays L.	Benesova et al. 2012
					Put. nascent polypeptide associated complex α chain	46575976					↓(15% soil water, 65d)				Quercus robur L.	Sergeant et al.,2011
					Nascent polypeptide-associated complex subunit A	TC289167			↓(drought, 14d, RAC875, tolerant)	↑(drought, 24d, RAC875)	↑(rewater, 25d, Kukri, sensitive)				Triticum aestivum L.	Ford et al., 2011
					WD-repeat protein	ACG30298.1	gi|89247710	↑(12.5% soil water, 6d, 2023)↓(12.5% soil water, 6d, CE704)							Zea mays L.	Benesova et al. 2012
					PRLI-interacting factor K		gi|11139266	↑(10% soil water content, 45d, HY,sensitive)	↓(10% soil water content, 45d, LD, tolerant)						Populus cathayana	Xiao et al.,2009
	Transcription regulator	TR	1		Transcription regulator	gb|EU962051.1|	gi|149000494	↑(12.5% soil water, 6d, 2023)↑(12.5% soil water, 6d, CE704)							Zea mays L.	Benesova et al. 2012
	Retrotransposon protein	RT	1		Retrotransposon protein	gb|EU958015.1|	gi|148953662	↑(12.5% soil water, 6d, 2023)↑(12.5% soil water, 6d, CE704)							Zea mays L.	Benesova et al. 2012
	RNA helicase	Hlc	1		Possible: DEAD-box ATP-dependent RNA helicase 2		gi|109893655	↑(25% soil water, NT)							Agrostis stolonifera	Merewitz et al., 2011
	Glycine-rich RNA binding protein	GR-RBP	8		Glycine-rich RNA binding protein		gi|6273331		↑(10% soil water content, 45d, LD)						Populus cathayana	Xiao et al.,2009
					Glycine-rich RNA binding protein		gi|20257707	↓(12.5% soil water, 6d, 2023)↓(12.5% soil water, 6d, CE704)							Zea mays L.	Benesova et al. 2012
					Glycine-rich RNA-binding protein 2	gb|EU962960.1|	gi|166565571	↑(12.5% soil water, 6d, 2023)↑(12.5% soil water, 6d, CE704)							Zea mays L.	Benesova et al. 2012
					Glycine-rich RNA-binding protein 2	gb|EU955998.1|	gi|149105093	↓(12.5% soil water, 6d, 2023)↓(12.5% soil water, 6d, CE704)							Zea mays L.	Benesova et al. 2012
					Glycine-rich RNA-binding protein 2	gb|EU955998.1|	gi|148950447	↓(12.5% soil water, 6d, 2023)↓(12.5% soil water, 6d, CE704)							Zea mays L.	Benesova et al. 2012
					Glycine-rich rna-binding protein 2	AT4G13850		↑(no watering, 3d)		↑(no watering, 10d)					Brassica napus	Koh et al., 2015
					Glycine-rich rna-binding protein 7	AT2G21660			↑(no watering, 7d)	↑(no watering, 10d)	↑(no watering, 14d)				Brassica napus	Koh et al., 2015
					Glycine-rich rna-binding protein 7	AT2G21660			↑(no watering, 7d)	↑(no watering, 10d)					Brassica napus	Koh et al., 2015
	Maturase K	MatK	1		Maturase K		gi|149213047		↓(10% soil water content, 45d, LD)						Populus cathayana	Xiao et al.,2009
	Ribonucleoprotein	RNP	6		Ribonucleoprotein A	gb|EU972036.1|	gi|149083997	↓(12.5% soil water, 6d, 2023)↓(12.5% soil water, 6d, CE704)							Zea mays L.	Benesova et al. 2012
					Ribonucleoprotein A	NP_001151728.1	gi|149065598	↓(12.5% soil water, 6d, 2023)↓(12.5% soil water, 6d, CE704)							Zea mays L.	Benesova et al. 2012
					Ribonucleoprotein A	gb|EU960096.1|	gi|110541059	↓(12.5% soil water, 6d, 2023)↓(12.5% soil water, 6d, CE704)							Zea mays L.	Benesova et al. 2012
					Ribonucleoprotein chloroplast put.	255540443	GO:0032388				↓(15% soil water, 65d)				Quercus robur L.	Sergeant et al.,2011
					Ribonucleoprotein rbp31	AT4G24770			↓(no watering, 7d)						Brassica napus	Koh et al., 2015
					Ribonucleoprotein chloroplastic-like	AT2G37220				↑(no watering, 10d)	↑(no watering, 14d)				Brassica napus	Koh et al., 2015
	RNA binding protein	RBP	5		RNA binding protein			↓(not irrigation, 10d, Brilliant)	↓(not irrigation, 15d, Brilliant)						Kentucky Bluegrass	Xu et al.,2010
					RNA-binding protein cp31	TC345585		↓(drought, 5d, Excalibur)↓(drought, 5d, RAC875)	↓(drought, 14d, Excalibur)↓(drought, 14d, Kukri)	↓(drought, 24d, Excalibur)					Triticum aestivum L.	Ford et al., 2011
					Putative RNA binding protein		gi|3850621	↓(25% soil water, NT)							Agrostis stolonifera	Merewitz et al., 2011
					RNA-binding protein CP33, chloroplastic	AT3G52380			↑(no watering, 7d)	↓(no watering, 10d)					Brassica napus	Koh et al., 2015
					chloroplast rna-binding protein 29	AT3G53460			↑(no watering, 7d)	↑(no watering, 10d)	↑(no watering, 14d)				Brassica napus	Koh et al., 2015
	Chloroplast stem-loop binding protein	CSP	3		CSP41A (chloroplast stem-loop binding protein)	TC293615					↓(rewater, 25d, Excalibur)↓(rewater, 25d, Kukri)↓(rewater, 25d, RAC875)				Triticum aestivum L.	Ford et al., 2011
					Chloroplast stem-loop binding protein	AT1G09340		↑(no watering, 3d)	↑(no watering, 7d)	↑(no watering, 10d)	↑(no watering, 14d)				Brassica napus	Koh et al., 2015
					Chloroplast stem-loop binding protein of 41 kda chloroplastic	AT3G63140		↑(no watering, 3d)	↑(no watering, 7d)	↑(no watering, 10d)	↑(no watering, 14d)				Brassica napus	Koh et al., 2015
	Multiple organellar rna editing factor 9	——	1		Multiple organellar rna editing factor 9	AT1G11430		↑(no watering, 3d)	↑(no watering, 7d)	↓(no watering, 10d)					Brassica napus	Koh et al., 2015
	Ribonuclease	RNase	4		Drought-induced S-like ribonuclease		gi|19068149	↓(50 % water lost daily, 20 d)							Oryza sativa L.	Rabello et al.,2014
					S-like RNase homologue	AY061961		↑(withhold water 38d, CT9993,TR62266)	↑(withhold water 43d, CT9993,TR62266)	↑(rewater 5d, CT9993,TR62266)					Oryza sativa L.	Salekdeh et al., 2002
					S-like RNase homologue	AY061961		↑(withhold water 38d, CT9993,TR62266)	↑(withhold water 43d, CT9993,TR62266)	↑(rewater 5d, CT9993,TR62266)	↑(rewater 10d, CT9993)				Oryza sativa L.	Salekdeh et al., 2002
					Endoribonuclease L-PSP family protein	TC282905				↑(drought, 24d, Excalibur)↑(drought, 24d, RAC875)					Triticum aestivum L.	Ford et al., 2011
	04 Protein synthesis (86)
	Ribosomal protein	RP	49		30S ribosomal protein 2 (plastid-specific; RNA-binding)	gb|EU956408.1|	gi|113754793	↓(12.5% soil water, 6d, 2023)↓(12.5% soil water, 6d, CE704)							Zea mays L.	Benesova et al. 2012
					30S ribosomal protein 3, chloroplastic	O48609		↑(25% field capacity, 28d, Piriformospora indica-inoculated)							Hordeum vulgare L.	Ghabooli et al.,2013
					30S ribosomal protein S1, chloroplast, putative, expressed		gi|108707824		↓(withholding irrigation, 15d, C299)						Cynodon dactylon L. Pers. ×Cynodon transvaalensis Burtt Davy, cv. Tifway,Cynodon dactylon L.	Zhao et al., 2011
					30S ribosomal protein S5	XP_002509457.1		↓(10% PEG6000, 4d)							Glycine max L.	Mohammadi et al., 2012
					30S ribosomal protein S5		gi|15226167	↑(no irrigation, 17d, Tiber)							Phaseolus vulgaris	Zadraznik et al.,2013
					30S ribosomal protein S13	NP_001149618.1	gi|101398311	↑(12.5% soil water, 6d, 2023)↓(12.5% soil water, 6d, CE704)							Zea mays L.	Benesova et al. 2012
					Predicted protein/ Hordeum vulgare ssp. vulgare homologous to chloroplastic 30S ribosomal protein 1/ Triticum urartu		gi|326502706	↓(withhold water to −2.5 Mpa soil water potential, 3 week)							Hordeum spontaneum	Ashoub et al., 2015
					40S ribosomal protein S3	XP_002516123.1		↓(10% PEG6000, 4d)							Glycine max L.	Mohammadi et al., 2012
					40S ribosomal protein SA (p40)	115473357		↑(30% relative water content)							Sporobolus stapﬁanus	Oliver et al.,2011
					40S Ribosomal protein SA-like		gi|357111906	↑( PEG6000, 48h)							Triticum aestivum L.	Zhang et al.,2014
					40S ribosomal protein S5	ACG24566.1	gi|193502072	↑(12.5% soil water, 6d, 2023)↓(12.5% soil water, 6d, CE704)							Zea mays L.	Benesova et al. 2012
					50s Ribosomal protein L10	O80362.1		↓(drought,4d)							Glycine max L.	Mohammadi et al., 2012
					50S ribosomal protein L12, chloroplastic	O22386		↑(25% field capacity, 28d, Piriformospora indica-inoculated)							Hordeum vulgare L.	Ghabooli et al.,2013
					50S ribosomal protein L12-3, chloroplast precursor	P36212		↑(10% PEG6000, 4d)							Glycine max L.	Mohammadi et al., 2012
					50S ribosomal protein L5, chloroplastic	TC310679				↑(drought, 24d, RAC875)	↑(rewater, 25d, RAC875)				Triticum aestivum L.	Ford et al., 2011
					50S Ribosomal protein L9	P118994.2		↓(10% PEG6000, 4d)	↓(drought,4d)						Glycine max L.	Mohammadi et al., 2012
					60S acidic ribosomal protein P1-like		gi|357144469	↑( PEG6000, 48h)							Triticum aestivum L.	Zhang et al.,2014
					60S acidic ribosomal protein P2A	P46252		↓(25% field capacity, 28d, non-inoculated)							Hordeum vulgare L.	Ghabooli et al.,2013
					60S acidic ribosomal protein PO		gi|6984134			↓(35% soil water, 21d)					Populus tremula L. × P. alba L.-clone INRA 717–1-B4	Bohler,et al., 2013
					60S acidic ribosomal protein P3 (RPP3B)	TC299863			↑(drought, 14d, Kukri)	↑(drought, 24d, Kukri)↑(drought, 24d, RAC875)					Triticum aestivum L.	Ford et al., 2011
					Mitochondrial 60S ribosomal protein L16		gi|417685	↑(10% soil water content, 45d, HY)							Populus cathayana	Xiao et al.,2009
					Putative plastid ribosomal protein S6		gi|113550334		↑(withholding irrigation, 15d, C299)						Cynodon dactylon L. Pers. ×Cynodon transvaalensis Burtt Davy, cv. Tifway,Cynodon dactylon L.	Zhao et al., 2011
					Ribosomal protein L12		gi|4176422		↓(withholding irrigation, 15d, C299)						Cynodon dactylon L. Pers. ×Cynodon transvaalensis Burtt Davy, cv. Tifway,Cynodon dactylon L.	Zhao et al., 2011
					Ribosomal protein L30	O49884.1		↓(10% PEG6000, 4d)							Glycine max L.	Mohammadi et al., 2012
					Ribosomal protein S19	NP_043064.1	gi|166492689	↑(12.5% soil water, 6d, 2023)↓(12.5% soil water, 6d, CE704)							Zea mays L.	Benesova et al. 2012
					Ribosomal protein S3		gi|11467230		↑(10% soil water content, 45d, LD)						Populus cathayana	Xiao et al.,2009
					Ribosomal protein S3		gi|56181039		↑(10% soil water content, 45d, LD)						Populus cathayana	Xiao et al.,2009
					Ribosomal protein S18		gi|11467213	↑(12.5% soil water, 6d, 2023)↓(12.5% soil water, 6d, CE704)							Zea mays L.	Benesova et al. 2012
					Chloroplast ribosomal L1-like protein	TC320892									Triticum aestivum L.	Ford et al., 2011
					PRPL11 (plastid ribosomal protein L11)	TC297633		↑(drought, 5d, RAC875)	↑(drought, 14d, Kukri)↓(drought, 5d, RAC875)		↓(rewater, 25d, Excalibur)				Triticum aestivum L.	Ford et al., 2011
					RPL12-C (ribosomal protein l12-c)	TC283409			↑(drought, 14d, Kukri)	↓(drought, 24d, Excalibur)	↓(rewater, 25d, Excalibur)↓(rewater, 25d, Kukri)↓(rewater, 25d, RAC875)				Triticum aestivum L.	Ford et al., 2011
					30s ribosomal protein s1, chloroplastic-like	AT5G30510			↑(no watering, 7d)	↓(no watering, 10d)	↑(no watering, 14d)				Brassica napus	Koh et al., 2015
					30s ribosomal protein s17, chloroplastic-like	AT1G79850		↑(no watering, 3d)		↑(no watering, 10d)					Brassica napus	Koh et al., 2015
					30s ribosomal protein s5	AT2G33800			↑(no watering, 7d)	↑(no watering, 10d)	↑(no watering, 14d)				Brassica napus	Koh et al., 2015
					40s ribosomal protein s15-1	AT1G04270					↑(no watering, 14d)				Brassica napus	Koh et al., 2015
					40s ribosomal protein s20-2	AT5G62300				↓(no watering, 10d)	↑(no watering, 14d)				Brassica napus	Koh et al., 2015
					40s ribosomal protein s3a	AT4G34670		↑(no watering, 3d)		↑(no watering, 10d)	↑(no watering, 14d)				Brassica napus	Koh et al., 2015
					40s ribosomal protein sa (laminin receptor-like protein)	AT1G72370				↑(no watering, 10d)					Brassica napus	Koh et al., 2015
					50s ribosomal protein chloroplastic	AT3G44890			↑(no watering, 7d)	↓(no watering, 10d)					Brassica napus	Koh et al., 2015
					50s ribosomal protein chloroplastic	AT4G01310				↑(no watering, 10d)					Brassica napus	Koh et al., 2015
					50s ribosomal protein chloroplastic-like	AT3G63490				↑(no watering, 10d)	↑(no watering, 14d)				Brassica napus	Koh et al., 2015
					50s ribosomal protein L12-1	AT3G27830				↑(no watering, 10d)	↑(no watering, 14d)				Brassica napus	Koh et al., 2015
					50s ribosomal protein L13	AT1G78630		↑(no watering, 3d)		↑(no watering, 10d)					Brassica napus	Koh et al., 2015
					50s ribosomal protein l3	AT2G43030				↑(no watering, 10d)	↓(no watering, 14d)				Brassica napus	Koh et al., 2015
					50s ribosomal protein l31	AT1G75350			↑(no watering, 7d)						Brassica napus	Koh et al., 2015
					50s ribosomal protein l4	AT1G07320				↑(no watering, 10d)					Brassica napus	Koh et al., 2015
					60s ribosomal protein l12-2	AT3G53430			↑(no watering, 7d)	↑(no watering, 10d)					Brassica napus	Koh et al., 2015
					plastid ribosomal protein l11	AT1G32990			↓(no watering, 7d)		↑(no watering, 14d)				Brassica napus	Koh et al., 2015
					60s acidic ribosomal protein p0-2	AT3G09200			↓(no watering, 7d)		↓(no watering, 14d)				Brassica napus	Koh et al., 2015
	Elongation factor	EF	20		Chloroplast translational elongation factor Tu			↓(25% soil water, NT)							Agrostis stolonifera	Merewitz et al., 2011
					Elongation factor 1-alpha	TC288390					↑(rewater, 25d, Excalibur)↑(rewater, 25d, Kukri)↑(rewater, 25d, RAC875)				Triticum aestivum L.	Ford et al., 2011
					Elongation factor 1-delta (eEF1D)	NP_001149263.1	gi|116814898	↓(12.5% soil water, 6d, 2023)↑(12.5% soil water, 6d, CE704)							Zea mays L.	Benesova et al. 2012
					Elongation factor alpha		gi|461988	↑(10 % ﬁeld capacity, 5d, # 15141)							Hordeum vulgare L.	Ashoub et al., 2013
					Elongation factor EF-2										Hordeum vulgare L.	Ashoub et al., 2013
					Elongation factor G	P34811				↑(no irrigation, 86d)					Populus deltoides×Populus nigra	Bonhomme et al.,2009
					Elongation factor Tu		gi|115456623		↓(withholding irrigation, 15d, C299)						Cynodon dactylon L. Pers. ×Cynodon transvaalensis Burtt Davy, cv. Tifway,Cynodon dactylon L.	Zhao et al., 2011
					Elongation factor Tu	Q43467.1		↑(drought,4d)							Glycine max L.	Mohammadi et al., 2012
					Elongation factor Tu. chloroplastic-like. predicted	XP_003575279a		↑(1/3 of field capacity, 14h, Mutant)							Triticum aestivum L.	Peremarti et al.,2014
					Putative elongation factor 2	49387779				↓(30% relative humidity, 96h)			↓(30% relative humidity, 168h)	↓(30% relative humidity, 192h)	Oryza sativa L.	Pandey et al.,2010
					Translational elongation factor EF-TuM (mitochondrial)		gi|11181616	↑(12.5% soil water, 6d, 2023)↑(12.5% soil water, 6d, CE704)							Zea mays L.	Benesova et al. 2012
					elongation factor 1b beta	AT1G30230		↑(no watering, 3d)	↑(no watering, 7d)	↓(no watering, 10d)	↑(no watering, 14d)				Brassica napus	Koh et al., 2015
					elongation factor 1b beta	AT1G30230				↓(no watering, 10d)	↑(no watering, 14d)				Brassica napus	Koh et al., 2015
					elongation factor chloroplastic-like	AT4G20360			↑(no watering, 7d)	↑(no watering, 10d)	↑(no watering, 14d)				Brassica napus	Koh et al., 2015
					elongation factor chloroplastic-like	AT4G20360					↑(no watering, 14d)				Brassica napus	Koh et al., 2015
					elongation factor p (ef-p)	AT3G08740					↑(no watering, 14d)				Brassica napus	Koh et al., 2015
					mitochondrial elongation factor tu	AT4G02930			↓(no watering, 7d)						Brassica napus	Koh et al., 2015
					Chloroplast translational elongation factor Tu		gi|6525065		↓(drought, 15d)						Poa pratensis L.	Xu amd Huang, 2012
					Translation elongation factor eEF-1 beta	432368		↑(30% relative humidity, 48h)	↑(30% relative humidity, 72h)						Oryza sativa L.	Pandey et al.,2010
					Translation elongation factor EF-Tu precursor, chloroplast	AAF15312			↑(withhold water 43d, CT9993,TR62266)						Oryza sativa L.	Salekdeh et al., 2002
	Translation initiation factor	eIF	10		Eukaryotic initiation factor			↓(0.21 M sorbitol, 48d)							Banana	Vanhove et al., 2012
					Eukaryotic initiation factor 4A-9 (EC 3.6.1.-)	Q40471		↑(25% field capacity, 18d)							Populus deltoides×Populus nigra	Bonhomme et al.,2009
					Eukaryotic initiation factor∗			↓(0.21 M sorbitol, 48d)							Banana	Vanhove et al., 2012
					Eukaryotic translation initiation factor 3 subunit 2 (eIF3-beta)	NP_001147501.1	gi|149043303	↑(12.5% soil water, 6d, 2023)↑(12.5% soil water, 6d, CE704)							Zea mays L.	Benesova et al. 2012
					Eukaryotic translation initiation factor 3 subunit B	P56821		↑(25% field capacity, 18d)		↓(no irrigation, 86d)					Populus deltoides×Populus nigra	Bonhomme et al.,2009
					Translation initiation factor if-2, putative			↓(35% RWC)							Gossypium herbaceum L.	Deeba et al., 2012
					eIF5A-3	P56335		↑(25% relative humidity, 48h)	↑(25% relative humidity, 120h)	↑(rewater 75% relative humidity, 24h)					Carissa spinarum	Zhang et al.,2010
					translation initiation factor 3 subunit f	AT2G39990		↑(no watering, 3d)	↓(no watering, 7d)		↓(no watering, 14d)				Brassica napus	Koh et al., 2015
					eukaryotic translation initiation factor 3g1	AT3G11400			↑(no watering, 7d)						Brassica napus	Koh et al., 2015
					eukaryotic translation initiation factor 5a-2	AT1G26630		↑(no watering, 3d)	↑(no watering, 7d)						Brassica napus	Koh et al., 2015
	tRNA synthase	TRS	3		Cysteinyl-tRNA synthase	108706130		↑(stop watering, 7d, GP)							Hordeum vulgare L.	Wendelboe-Nelson et al., 2010
					Asx tRNA synthetase (AspRS/AsnRS) class II core domain-contating protein	AT4G26870		↑(no watering, 3d)			↑(no watering, 14d)				Brassica napus	Koh et al., 2015
					prolyl-trna synthetase	AT5G52520				↓(no watering, 10d)	↑(no watering, 14d)				Brassica napus	Koh et al., 2015
	Ribosome recycling factor	RRF	3		Putative Ribosome recycling factor, chloroplast	34394208		↑(30% relative humidity, 48h)	↑(30% relative humidity, 72h)	↑(30% relative humidity, 96h)	↑(30% relative humidity, 120h)	↑(30% relative humidity, 144h)	↑(30% relative humidity, 168h)	↑(30% relative humidity, 192h)	Oryza sativa L.	Pandey et al.,2010
					RRF (ribosome recycling factor)	TC282871		↑(drought, 5d, RAC875)		↑(drought, 24d, Excalibur)					Triticum aestivum L.	Ford et al., 2011
					ribosome-recycling chloroplastic-like	AT3G63190		↑(no watering, 3d)		↑(no watering, 10d)	↑(no watering, 14d)				Brassica napus	Koh et al., 2015
	endoribonuclease l-psp family protein	——	1		endoribonuclease l-psp family protein	AT3G20390		↑(no watering, 3d)	↑(no watering, 7d)	↓(no watering, 10d)	↑(no watering, 14d)				Brassica napus	Koh et al., 2015
	05 Protein processing (192)
	Peptidyl-prolyl cis-trans isomerase	PPIase	29		Peptidyl-prolyl cis-trans isomerase		gi|357511613	↑(no irrigation, 17d, Tiber)							Phaseolus vulgaris	Zadraznik et al.,2013
					Peptidyl-prolyl cis-trans isomerase		gi|357511613	↑(no irrigation, 17d, Tiber)							Phaseolus vulgaris	Zadraznik et al.,2013
					Putative peptidylprolyl isomerase		gi|46359893	↓(no irrigation, 17d, Starozagorski)							Phaseolus vulgaris	Zadraznik et al.,2013
					FKBP-type peptidyl-prolyl cis-trans isomerase	TC310398			↑(drought, 14d, Kukri)						Triticum aestivum L.	Ford et al., 2011
					Peptidyl-prolyl cis-trans isomerase 1	Q8W171.1		↑(drought,4d)							Glycine max L.	Mohammadi et al., 2012
					Peptidyl-prolyl cis-trans isomerase cyclophilin-type	BE418762					↓(rewater, 25d, Excalibur)				Triticum aestivum L.	Ford et al., 2011
					Peptidyl-prolyl cis-trans isomerase cyclophilin-type family protein	TC284835				↑(drought, 24d, Kukri)↑(drought, 24d, RAC875)					Triticum aestivum L.	Ford et al., 2011
					Peptidyl-prolyl cis-trans isomerase CYP19-2	TC279383		↑(drought, 5d, RAC875)		↑(drought, 24d, Kukri)↑(drought, 24d, RAC875)	↑(rewater, 25d, Excalibur)↑(rewater, 25d, Kukri)↑(rewater, 25d, RAC875)				Triticum aestivum L.	Ford et al., 2011
					Peptidyl-prolyl cis-trans isomerase CYP20-2, chloroplastic	Q9ASS6		↑(25% field capacity, 28d, Piriformospora indica-inoculated)							Hordeum vulgare L.	Ghabooli et al.,2013
					Peptidyl-prolyl cis-trans isomerase CYP38, chloroplastic	Q9SSA5		↓(25% field capacity, 28d, Piriformospora indica-inoculated)							Hordeum vulgare L.	Ghabooli et al.,2013
					Peptidyl-prolyl isomerase	gb|EU964693.1|	gi|148940879	↑(12.5% soil water, 6d, 2023)↑(12.5% soil water, 6d, CE704)							Zea mays L.	Benesova et al. 2012
					Putative 70KDa peptidylprolyl isomerase	42761405		↑(30% relative humidity, 48h)	↑(30% relative humidity, 72h)	↑(30% relative humidity, 96h)	↑(30% relative humidity, 120h)	↑(30% relative humidity, 144h)	↑(30% relative humidity, 168h)	↑(30% relative humidity, 192h)	Oryza sativa L.	Pandey et al.,2010
					Putative peptidyl-prolycis-trans isomerase protein	50508306					↑(30% relative humidity, 120h)	↑(30% relative humidity, 144h)			Oryza sativa L.	Pandey et al.,2010
					peptidyl-prolyl cis-trans isomerase chloroplastic (CYCLOPHILIN 38)	AT3G01480		↑(no watering, 3d)	↑(no watering, 7d)		↑(no watering, 14d)				Brassica napus	Koh et al., 2015
					peptidyl-prolyl cis-trans isomerase chloroplastic (CYCLOPHILIN 38)	AT3G01480			↓(no watering, 7d)						Brassica napus	Koh et al., 2015
					peptidyl-prolyl cis-trans isomerase chloroplastic isoform x1	AT5G13410		↓(no watering, 3d)	↑(no watering, 7d)	↑(no watering, 10d)	↑(no watering, 14d)				Brassica napus	Koh et al., 2015
					peptidyl-prolyl cis-trans isomerase cyp20-2 (CYCLOPHILIN 20-2)	AT5G13120			↓(no watering, 7d)	↓(no watering, 10d)					Brassica napus	Koh et al., 2015
					peptidyl-prolyl cis-trans isomerase cyp20-3 (CYCLOPHILIN 20-3)	AT3G62030			↑(no watering, 7d)	↑(no watering, 10d)	↑(no watering, 14d)				Brassica napus	Koh et al., 2015
					peptidyl-prolyl cis-trans isomerase cyp20-3 (CYCLOPHILIN 20-3)	AT3G62030			↑(no watering, 7d)	↑(no watering, 10d)					Brassica napus	Koh et al., 2015
					peptidyl-prolyl cis-trans isomerase cyp37	AT3G15520				↑(no watering, 10d)					Brassica napus	Koh et al., 2015
					peptidyl-prolyl cis-trans isomerase fkbp12	AT5G64350		↑(no watering, 3d)		↑(no watering, 10d)	↑(no watering, 14d)				Brassica napus	Koh et al., 2015
					peptidyl-prolyl cis-trans isomerase fkbp16- chloroplastic	AT3G10060			↑(no watering, 7d)		↑(no watering, 14d)				Brassica napus	Koh et al., 2015
					peptidyl-prolyl cis-trans isomerase-like (CYCLOPHILIN 19)	AT2G16600			↓(no watering, 7d)	↓(no watering, 10d)					Brassica napus	Koh et al., 2015
					Put. peptidyl-pro cis-trans isomer.	223545637	GO:0006457			↑(15% soil water, 56d)					Quercus robur L.	Sergeant et al.,2011
					Peptidyl-prolyl cis-trans isomerase	B6U5I1		↓（withholding water, 9 d）							Zea mays	Sanggon et al., 2015
					Putative peptidyl-prolyl cis-trans isomerase protein	BAC79666		↑（no irrigation, 20 d）							Oryza sativa L.	Ji et al., 2012
					Cyclophilin	AAX94775.1		↑(drought,4d)							Glycine max L.	Mohammadi et al., 2012
					CYP38 (cyclophilin 38)	TC278477		↓(drought, 5d, RAC875)		↑(drought, 24d, RAC875)					Triticum aestivum L.	Ford et al., 2011
					rotamase fkbp 1	AT3G25230		↑(no watering, 3d)	↓(no watering, 7d)	↓(no watering, 10d)	↓(no watering, 14d)				Brassica napus	Koh et al., 2015
	Protein disulphide isomerase	PDI	9		Putative protein disulphide isomerase (PDI)		gi|45593261	↓(25% soil water, NT)							Agrostis stolonifera	Merewitz et al., 2011
					Probable protein disulfide-isomerase A6 (EC 5.3.4.1)	P38661		↓(25% field capacity, 18d)							Populus deltoides×Populus nigra	Bonhomme et al.,2009
					Protein disulfide isomerase		gi|1709617	↑(10 % ﬁeld capacity, 5d, # 15141)	↑(10 % ﬁeld capacity, 5d, # 15163)						Hordeum vulgare L.	Ashoub et al., 2013
					Predicted protein Hordeum vulgare ssp. vulgare homologous to protein disulfide isomerase		gi|326532720	↑(withhold water to −2.5 Mpa soil water potential, 3 week)							Hordeum spontaneum	Ashoub et al., 2015
					Protein disulfide-isomerase	11133818	GO:0006457				↓(15% soil water, 65d)				Quercus robur L.	Sergeant et al.,2011
					Protein disulfide isomerase-like 1-1	AT1G21750				↑(no watering, 10d)	↑(no watering, 14d)				Brassica napus	Koh et al., 2015
					Protein disulfide isomerase-like 1-2	AT1G77510			↑(no watering, 7d)	↑(no watering, 10d)					Brassica napus	Koh et al., 2015
					Protein disulfide isomerase-like 1-2	AT1G77510					↓(no watering, 14d)				Brassica napus	Koh et al., 2015
					Protein disulfide-isomerase like 2-1	AT2G47470			↓(no watering, 7d)						Brassica napus	Koh et al., 2015
	Molecular chaperone	MC	26		Cp10-like protein		gi|21780187	↑(no irrigation, 107d)							Cistus albidus	Brossa et al., 2015
					Chloroplast chaperonin 10	AT2G44650				↓(no watering, 10d)					Brassica napus	Koh et al., 2015
					CPN20 (chaperonin 20)	TC278575		↓(drought, 5d, Excalibur)↓(drought, 5d, RAC875)		↑(drought, 24d, RAC875)	↓(rewater, 25d, Excalibur)↑(rewater, 25d, RAC875)				Triticum aestivum L.	Ford et al., 2011
					CPN20 (chaperonin 20)	TC310557				↑(drought, 24d, Kukri)↑(drought, 24d, RAC875)					Triticum aestivum L.	Ford et al., 2011
					20 kDa chaperonin, chloroplastic-like		gi|356547960	↑(no irrigation, 17d, Tiber)							Phaseolus vulgaris	Zadraznik et al.,2013
					20 kDa chaperonin	O65282				↓(no irrigation, 86d)					Populus deltoides×Populus nigra	Bonhomme et al.,2009
					20 kDa chaperonin, chloroplastic	AT5G20720		↑(no watering, 3d)	↑(no watering, 7d)	↑(no watering, 10d)	↑(no watering, 14d)				Brassica napus	Koh et al., 2015
					20 kDa chaperonin, chloroplastic	AT5G20720			↑(no watering, 7d)		↑(no watering, 14d)				Brassica napus	Koh et al., 2015
					Chaperonin 20	AT5G20720			↑(no watering, 7d)						Brassica napus	Koh et al., 2015
					CPN60A (chaperonin-60A)	TC302569		↓(drought, 5d, RAC875)	↑(drought, 14d, Excalibur)↓(drought, 14d, Kukri)	↓(drought, 24d, Excalibur)↑(drought, 24d, RAC875)	↑(rewater, 25d, Excalibur)				Triticum aestivum L.	Ford et al., 2011
					CPN60B	TC282663		↓(drought, 5d, RAC875)	↑(drought, 14d, Excalibur)	↓(drought, 24d, Excalibur)↑(drought, 24d, Kukri)↑(drought, 24d, RAC875)	↑(rewater, 25d, Excalibur)				Triticum aestivum L.	Ford et al., 2011
					Cpn60α		gi|134101	↑(no irrgation, 3d)							Citrullus lanatus	Akashi et al., 2011
					60 kDa chaperonin subunit beta			↓(not irrigation, 10d, Brilliant)	↓(not irrigation, 15d, Brilliant)						Kentucky Bluegrass	Xu et al.,2010
					60 kDa chaperonin subunit α	P21239			↓(25% relative humidity, 120h)						Carissa spinarum	Zhang et al.,2010
					60-kDa chaperonin			↑(drought, 10d)	↓(drought, 15d)						Poa pratensis L.	Xu amd Huang, 2012
					Chaperonin 60		gi|309557	↑(12.5% soil water, 6d, 2023)↑(12.5% soil water, 6d, CE704)							Zea mays L.	Benesova et al. 2012
					Chaperonin CPN60-1	108706134		↑(30% relative humidity, 48h)	↑(30% relative humidity, 72h)	↑(30% relative humidity, 96h)	↑(30% relative humidity, 120h)	↑(30% relative humidity, 144h)	↑(30% relative humidity, 168h)	↑(30% relative humidity, 192h)	Oryza sativa L.	Pandey et al.,2010
					Chaperonin CPN60-2	Q05046		↑(25% field capacity, 18d)		↑(no irrigation, 86d)					Populus deltoides×Populus nigra	Bonhomme et al.,2009
					chaperonin 60 subunit beta 1	AT1G55490		↑(no watering, 3d)	↑(no watering, 7d)	↑(no watering, 10d)	↑(no watering, 14d)				Brassica napus	Koh et al., 2015
					Chloroplast chaperonin 60 alpha	AT2G28000		↑(no watering, 3d)	↑(no watering, 7d)	↑(no watering, 10d)	↑(no watering, 14d)				Brassica napus	Koh et al., 2015
					Chaperonin cpn60-like mitochondrial	AT2G33210			↑(no watering, 7d)	↓(no watering, 10d)	↑(no watering, 14d)				Brassica napus	Koh et al., 2015
					Groes chaperonin, putative		gi|223544718			↑(rewater,7d)					Populus tremulaL.×P. albaL.	Durand et al.,2011
					Groes chaperonin, putative		gi|223544718			↑(rewater,7d)					Populus tremulaL.×P. albaL.	Durand et al.,2011
					GrpE like protein	TC297661		↑(drought, 5d, RAC875)	↑(drought, 14d, Kukri)	↑(drought, 24d, Excalibur)↑(drought, 24d, RAC875)					Triticum aestivum L.	Ford et al., 2011
					Molecular chaperone (DnaJ superfamily)		gi|116059499	↑(10% soil water content, 45d, HY)							Populus cathayana	Xiao et al.,2009
					Chaperone protein 3	AT5G15450				↑(no watering, 10d)					Brassica napus	Koh et al., 2015
	Calnexin (chaperone)	CNX	1		Calnexin		gi|1181331	↑(12.5% soil water, 6d, 2023)↑(12.5% soil water, 6d, CE704)							Zea mays L.	Benesova et al. 2012
	Endoplasmin (chaperone)	——	2		Endoplasmin	gb|EU970871.1|	gi|148965481	↑(12.5% soil water, 6d, 2023)↑(12.5% soil water, 6d, CE704)							Zea mays L.	Benesova et al. 2012
	T-complex protein	TCP1	1		T-complex protein 1, alpha subunit	Q8H9B2				↓(no irrigation, 86d)					Populus deltoides×Populus nigra	Bonhomme et al.,2009
					Endoplasmin	NP_001151475.1	gi|110203034	↑(12.5% soil water, 6d, 2023)↑(12.5% soil water, 6d, CE704)							Zea mays L.	Benesova et al. 2012
	ER-luminal binding protein	BiP	2		ER-luminal binding protein		gi|162457723	↑(12.5% soil water, 6d, 2023)↑(12.5% soil water, 6d, CE704)							Zea mays L.	Benesova et al. 2012
					ER-luminal binding protein cBiPe3	gb|U58209.1|ZMU58209	gi|148946713	↑(12.5% soil water, 6d, 2023)↑(12.5% soil water, 6d, CE704)							Zea mays L.	Benesova et al. 2012
	Low molecular weight heat shock protein(chaperone)	LMW HSP	50		17.6 kDa class I small heat shock protein		gi|4836473	↑(10% soil water content, 45d, HY)							Populus cathayana	Xiao et al.,2009
					17.7 kDa class I small heat shock protein	ABS72445		↑(drought,4d)							Glycine max L.	Mohammadi et al., 2012
					17.7 kDa class I small heat shock protein		gi|154293473	↑(no irrigation, 17d, Starozagorski)							Phaseolus vulgaris	Zadraznik et al.,2013
					18.2 kDa class I HSP	P27880		↑(25% relative humidity, 48h)	↑(25% relative humidity, 120h)	↑(rewater 75% relative humidity, 24h)					Carissa spinarum	Zhang et al.,2010
					LMW HSP, mitochondrial type I		gi|7159338	↑(no irrgation, 3d)							Citrullus lanatus	Akashi et al., 2011
					Low molecular weight heat shock protein		gi|159138941	↑(no irrigation, 107d)							Cistus albidus	Brossa et al., 2015
					CII small heat shock protein 1		gi|259123935	↑(no irrigation, 107d)							Cistus albidus	Brossa et al., 2015
					Heat shock protein		gi|159138935	↑(no irrigation, 107d)							Cistus albidus	Brossa et al., 2015
					Heat shock protein		gi|224146037	↑(no irrigation, 107d)							Cistus albidus	Brossa et al., 2015
					HSP 17.6L	T07624		↑(25% relative humidity, 48h)	↑(25% relative humidity, 120h)	↑(rewater 75% relative humidity, 24h)					Carissa spinarum	Zhang et al.,2010
					HSP 17.7	CAA37847		↑(25% relative humidity, 48h)	↑(25% relative humidity, 120h)	↑(rewater 75% relative humidity, 24h)					Carissa spinarum	Zhang et al.,2010
					HSP 17a.19	CAB90700		↑(25% relative humidity, 48h)	↑(25% relative humidity, 120h)	↑(rewater 75% relative humidity, 24h)					Carissa spinarum	Zhang et al.,2010
					HSP 20.1	CAA12387		↑(25% relative humidity, 48h)	↑(25% relative humidity, 120h)	↑(rewater 75% relative humidity, 24h)					Carissa spinarum	Zhang et al.,2010
					HSP 20.1	CAA12387		↑(25% relative humidity, 48h)	↑(25% relative humidity, 120h)	↑(rewater 75% relative humidity, 24h)					Carissa spinarum	Zhang et al.,2010
					HSP16.9, cytosolic type I		gi|123545	↑(no irrgation, 3d)							Citrullus lanatus	Akashi et al., 2011
					HSP17.5, cytosolic type I		gi|99033691	↑(no irrgation, 3d)							Citrullus lanatus	Akashi et al., 2011
					HSP17.5, cytosolic type I		gi|123539	↑(no irrgation, 3d)							Citrullus lanatus	Akashi et al., 2011
					HSP17.5, cytosolic type I		gi|123538	↑(no irrgation, 3d)							Citrullus lanatus	Akashi et al., 2011
					HSP17.5, cytosolic type I		gi|123538	↑(no irrgation, 3d)							Citrullus lanatus	Akashi et al., 2011
					HSP17.5, cytosolic type II		gi|140083605	↑(no irrgation, 3d)							Citrullus lanatus	Akashi et al., 2011
					HSP17.7, cytosolic type I		gi|8250119	↑(no irrgation, 3d)							Citrullus lanatus	Akashi et al., 2011
					HSP20			↑(0.21 M sorbitol, 48d)							Banana	Vanhove et al., 2012
					HSP20, cytosolic type I		gi|34902016	↑(no irrgation, 3d)							Citrullus lanatus	Akashi et al., 2011
					Hsp20/alpha crystallin family, putative	31430296			↑(30% relative humidity, 72h)	↑(30% relative humidity, 96h)	↑(30% relative humidity, 120h)	↑(30% relative humidity, 144h)	↑(30% relative humidity, 168h)	↑(30% relative humidity, 192h)	Oryza sativa L.	Pandey et al.,2010
					HSP22, ER type		gi|30575574	↑(no irrgation, 3d)							Citrullus lanatus	Akashi et al., 2011
					sHSP	CAA65020		↑(25% relative humidity, 48h)	↑(25% relative humidity, 120h)	↑(rewater 75% relative humidity, 24h)					Carissa spinarum	Zhang et al.,2010
					Small heat shock protein		gi|16930753	↑(10% soil water content, 45d, HY)							Populus cathayana	Xiao et al.,2009
					Cytosolic class I small heat shock protein type 2		gi|283482274	↑(no irrigation, 107d)							Cistus albidus	Brossa et al., 2015
					Heat shock protein 16.9 kDa (alpha-cristalline-type class I)	gb|EU975309.1|	gi|149075616	↑(12.5% soil water, 6d, 2023)↑(12.5% soil water, 6d, CE704)							Zea mays L.	Benesova et al. 2012
					Heat shock protein 16.9 kDa (alpha-cristalline-type class I)	gb|EU952685.1|	gi|149089123	↑(12.5% soil water, 6d, 2023)↑(12.5% soil water, 6d, CE704)							Zea mays L.	Benesova et al. 2012
					Heat shock protein 16.9 kDa (alpha-cristalline-type class I)	gb|EU968243.1|	gi|92088239	↑(12.5% soil water, 6d, 2023)↑(12.5% soil water, 6d, CE704)							Zea mays L.	Benesova et al. 2012
					Heat shock protein 17,5 kDa (alpha-cristalline-type class II)		gi|162463382	↑(12.5% soil water, 6d, 2023)↑(12.5% soil water, 6d, CE704)							Zea mays L.	Benesova et al. 2012
					Heat shock protein 17,5 kDa (alpha-cristalline-type class II)	gb|EU970990.1|	gi|149021622	↑(12.5% soil water, 6d, 2023)↑(12.5% soil water, 6d, CE704)							Zea mays L.	Benesova et al. 2012
					Heat shock protein 17,8 kDa (alpha-cristalline-type class I)		gi|162459174	↑(12.5% soil water, 6d, 2023)↑(12.5% soil water, 6d, CE704)							Zea mays L.	Benesova et al. 2012
					Heat shock protein 17.2 kDa (alpha-cristalline-type class I)		gi|162459222	↑(12.5% soil water, 6d, 2023)↑(12.5% soil water, 6d, CE704)							Zea mays L.	Benesova et al. 2012
					Heat shock protein 17.4 kDa (alpha-cristalline-type class I)	gb|EU967201.1|	gi|149112822	↑(12.5% soil water, 6d, 2023)↑(12.5% soil water, 6d, CE704)							Zea mays L.	Benesova et al. 2012
					Heat shock protein 17.4 kDa (alpha-cristalline-type class I)	gb|EU961108.1|	gi|149072857	↑(12.5% soil water, 6d, 2023)↑(12.5% soil water, 6d, CE704)							Zea mays L.	Benesova et al. 2012
					Heat shock protein 17.4 kDa (alpha-cristalline-type class I)	gb|EU965873.1|	gi|148972561	↑(12.5% soil water, 6d, 2023)↑(12.5% soil water, 6d, CE704)							Zea mays L.	Benesova et al. 2012
					Heat shock protein 17.4 kDa (alpha-cristalline-type class I)	gb|EU962980.1|	gi|149109747	↑(12.5% soil water, 6d, 2023)↑(12.5% soil water, 6d, CE704)							Zea mays L.	Benesova et al. 2012
					Heat shock protein 17.3 KD	S16525		↑(30% ﬁeld capacity)							Triticum aestivum L.grass (Elymus elongatum)	Gazanchian et al., 2007
					Heat shock protein 17.9 KD	S72544		↑(32% ﬁeld capacity)							Triticum aestivum L.grass (Elymus elongatum)	Gazanchian et al., 2007
					Heat shock protein 17.8		gi|117188222	↑(10% soil water content, 45d, HY)	↑(10% soil water content, 45d, LD)						Populus cathayana	Xiao et al.,2009
					Heat shock protein 18		gi|82941445	↑(10% soil water content, 45d, HY)							Populus cathayana	Xiao et al.,2009
					Similar to J-type co-chaperone HSC20		gi55660941	↑(25% field capacity, 20d)							Hippophae rhamnoides L.	Xu et al.,2009
					Heat shock protein 22 kDa (alpha-cristalline-type)	gb|EU961071.1|	gi|149098541	↑(12.5% soil water, 6d, 2023)↑(12.5% soil water, 6d, CE704)							Zea mays L.	Benesova et al. 2012
					Heat shock protein 22 kDa (alpha-cristalline-type)		gi|162458147	↑(12.5% soil water, 6d, 2023)↑(12.5% soil water, 6d, CE704)							Zea mays L.	Benesova et al. 2012
					Heat shock protein 22.0 kDa (class IV)	gb|EU969630.1|	gi|149100431	↑(12.5% soil water, 6d, 2023)↑(12.5% soil water, 6d, CE704)							Zea mays L.	Benesova et al. 2012
					Heat shock protein 26		gi|453670	↑(10% soil water content, 45d, HY)							Populus cathayana	Xiao et al.,2009
					Heat shock protein 26 kDa (alpha-cristalline-type)		gi|162461165	↑(12.5% soil water, 6d, 2023)↑(12.5% soil water, 6d, CE704)							Zea mays L.	Benesova et al. 2012
					Heat shock protein 26 kDa (plastidic, alpha-cristalline-type)	gb|EU951996.1|	gi|149085295	↑(12.5% soil water, 6d, 2023)↑(12.5% soil water, 6d, CE704)							Zea mays L.	Benesova et al. 2012
	High molecular weight heat shock protein	HMW HSP	69		Hypothetical protein CICLE_v10033622 mg/Citrus clementina homologous to heat shock protein 70		gi|567886990	↑(withhold water to −2.5 Mpa soil water potential, 3 week)							Hordeum spontaneum	Ashoub et al., 2015
					Heat shock 70 kDa protein 4L		gi|475620200	↑(withhold water to −2.5 Mpa soil water potential, 3 week)							Hordeum spontaneum	Ashoub et al., 2015
					Heat shock cognate 70 kDa protein		gi|475551788	↑(withhold water to −2.5 Mpa soil water potential, 3 week)							Hordeum spontaneum	Ashoub et al., 2015
					Heat shock protein 70	ACJ11741.1		↑(10% PEG6000, 4d)	↑(drought,4d)						Glycine max L.	Mohammadi et al., 2012
					Heat shock protein 70	gb|EU976330.1|	gi|149112242	↑(12.5% soil water, 6d, 2023)↑(12.5% soil water, 6d, CE704)							Zea mays L.	Benesova et al. 2012
					Heat shock protein 70	NP_001151739.1	gi|149082180	↑(12.5% soil water, 6d, 2023)↑(12.5% soil water, 6d, CE704)							Zea mays L.	Benesova et al. 2012
					Heat shock protein 70	gb|EU971059.1|	gi|89106457	↑(12.5% soil water, 6d, 2023)↑(12.5% soil water, 6d, CE704)							Zea mays L.	Benesova et al. 2012
					Heat shock protein 70	XP_003568297.1	gi|148946122	↑(12.5% soil water, 6d, 2023)↑(12.5% soil water, 6d, CE704)							Zea mays L.	Benesova et al. 2012
					Heat shock protein 70	gb|AY914601.1|	gi|166529853	↑(12.5% soil water, 6d, 2023)↑(12.5% soil water, 6d, CE704)							Zea mays L.	Benesova et al. 2012
					Heat shock protein 70	emb|X03697.1|ZMHSP702	gi|148946316	↑(12.5% soil water, 6d, 2023)↑(12.5% soil water, 6d, CE704)							Zea mays L.	Benesova et al. 2012
					Heat shock protein 70	ABF95267.1	gi|148952624	↑(12.5% soil water, 6d, 2023)↑(12.5% soil water, 6d, CE704)							Zea mays L.	Benesova et al. 2012
					Heat shock protein 70	emb|X67711.2|OSHSC70A	gi|148986856	↑(12.5% soil water, 6d, 2023)↑(12.5% soil water, 6d, CE704)							Zea mays L.	Benesova et al. 2012
					Heat shock protein 70		gi|224970	↑(12.5% soil water, 6d, 2023)↑(12.5% soil water, 6d, CE704)							Zea mays L.	Benesova et al. 2012
					Heat shock protein 70	ABF95267.1	gi|148952625	↑(12.5% soil water, 6d, 2023)↑(12.5% soil water, 6d, CE704)							Zea mays L.	Benesova et al. 2012
					Heat shock protein 70	Q39641		↑(25% field capacity, 18d)							Populus deltoides×Populus nigra	Bonhomme et al.,2009
					Heat shock protein 70		gi|6911553	↑(10% soil water content, 45d, HY)	↑(10% soil water content, 45d, LD)						Populus cathayana	Xiao et al.,2009
					Heat shock protein 70		gi|6911553	↑(10% soil water content, 45d, HY)							Populus cathayana	Xiao et al.,2009
					Heat shock protein 70				↑(not irrigation, 15d, Midnight)						Kentucky Bluegrass	Xu et al.,2010
					Heat shock protein 90	dbj|AB111810.1|	gi|120480871	↑(12.5% soil water, 6d, 2023)↑(12.5% soil water, 6d, CE704)							Zea mays L.	Benesova et al. 2012
					Heat shock protein 90		gi|294717810	↑(10 % ﬁeld capacity, 5d, # 15141)	↑(10 % ﬁeld capacity, 5d, # 15163)						Hordeum vulgare L.	Ashoub et al., 2013
					Heat shock protein 90 (82 kDa)		gi|729771	↑(12.5% soil water, 6d, 2023)↑(12.5% soil water, 6d, CE704)							Zea mays L.	Benesova et al. 2012
					HSP100		gi|157345751	↑(no irrgation, 3d)							Citrullus lanatus	Akashi et al., 2011
					HSP70		gi|20559	↑(no irrgation, 3d)							Citrullus lanatus	Akashi et al., 2011
					HSP70		gi|476003	↑( PEG6000, 48h)							Triticum aestivum L.	Zhang et al.,2014
					HSP81-2		gi|15241115	↑(no irrgation, 3d)							Citrullus lanatus	Akashi et al., 2011
					HSP90		gi|161702923	↑(no irrgation, 3d)							Citrullus lanatus	Akashi et al., 2011
					Heat shock protein 70 (DnaK-type)		gi|283043	↑(12.5% soil water, 6d, 2023)↑(12.5% soil water, 6d, CE704)							Zea mays L.	Benesova et al. 2012
					APG6/CLpB-P/CLPB3; ATP binding/ATPase homeolog to chloroplast HSP100/ClpB (Solanum lycopersicum)		gi|157345751		↑(10% soil water content, 45d, LD)						Populus cathayana	Xiao et al.,2009
					OSJNBb0085F13.17 protein-heat shock protein 90	39104468		↑(30% relative humidity, 48h)							Oryza sativa L.	Pandey et al.,2010
					Predicted protein/ Hordeum vulgare ssp. vulgare homologous to heat shock protein 70		gi|326506132	↑(withhold water to −2.5 Mpa soil water potential, 3 week)							Hordeum spontaneum	Ashoub et al., 2015
					Predicted similar to HSC70-1, ATP binding isoform 1		gi|225434994	↑(no irrigation, 107d)							Cistus albidus	Brossa et al., 2015
					Putative chaperonin 60 beta	7248401		↑(30% relative humidity, 48h)	↑(30% relative humidity, 72h)	↑(30% relative humidity, 96h)	↑(30% relative humidity, 120h)	↑(30% relative humidity, 144h)	↑(30% relative humidity, 168h)	↑(30% relative humidity, 192h)	Oryza sativa L.	Pandey et al.,2010
					Putative dnaK-type molecularchaperone	46805772			↑(30% relative humidity, 72h)	↑(30% relative humidity, 96h)	↑(30% relative humidity, 120h)	↑(30% relative humidity, 144h)	↑(30% relative humidity, 168h)	↑(30% relative humidity, 192h)	Oryza sativa L.	Pandey et al.,2010
					Putative dnaK-type molecularchaperone BiP	41052822			↑(30% relative humidity, 72h)	↑(30% relative humidity, 96h)	↑(30% relative humidity, 120h)	↑(30% relative humidity, 144h)	↑(30% relative humidity, 168h)	↑(30% relative humidity, 192h)	Oryza sativa L.	Pandey et al.,2010
					Unnamed protein product, homeolog to chloroplast HSP100/ClpB		gi|157345751 gi|68989120	↑(10% soil water content, 45d, HY)	↑(10% soil water content, 45d, LD)						Populus cathayana	Xiao et al.,2009
					DnaK-type molecular chaperone hsp70	62733235						↑(30% relative humidity, 144h)	↑(30% relative humidity, 168h)	↑(30% relative humidity, 192h)	Oryza sativa L.	Pandey et al.,2010
					Chloroplast heat shock protein 70-1	AT4G24280				↑(no watering, 10d)					Brassica napus	Koh et al., 2015
					Heat shock 70 kda protein chloroplastic-like	AT4G24280			↑(no watering, 7d)	↑(no watering, 10d)	↑(no watering, 14d)				Brassica napus	Koh et al., 2015
					Heat shock 70 kda protein chloroplastic-like	AT4G24280			↑(no watering, 7d)						Brassica napus	Koh et al., 2015
					Heat shock 70 kda protein mitochondrial	AT4G37910		↓(no watering, 3d)		↑(no watering, 10d)	↑(no watering, 14d)				Brassica napus	Koh et al., 2015
					Heat shock cognate 71 kda protein	AT5G02500			↓(no watering, 7d)						Brassica napus	Koh et al., 2015
					Heat shock protein 70-4	AT3G12580				↑(no watering, 10d)					Brassica napus	Koh et al., 2015
					Heat shock protein 90.2	AT5G56030			↑(no watering, 7d)	↑(no watering, 10d)					Brassica napus	Koh et al., 2015
					Heat-shock protein 101 (hsp100)	ref|NM_001111465.1|	gi|149106709	↑(12.5% soil water, 6d, 2023)↑(12.5% soil water, 6d, CE704)							Zea mays L.	Benesova et al. 2012
					Heat-shock protein 90 (plastidic)	emb|Z30243.1|SCCLHSP	gi|148937159	↓(12.5% soil water, 6d, 2023)↑(12.5% soil water, 6d, CE704)							Zea mays L.	Benesova et al. 2012
					Hsc70		gi|762844	↑(withhold water to −2.5 Mpa soil water potential, 3 week)							Hordeum spontaneum	Ashoub et al., 2015
					HSC70-1 (heat shock cognate protein 70-1	TC328783			↑(drought, 14d, Excalibur)↑(drought, 14d, RAC875)		↑(rewater, 25d, Excalibur)				Triticum aestivum L.	Ford et al., 2011
					Heat shock protein STI (TPR domain)	gb|EU972939.1|	gi|149076791	↑(12.5% soil water, 6d, 2023)↑(12.5% soil water, 6d, CE704)							Zea mays L.	Benesova et al. 2012
					Heat shock protein STI	115447567		↓(30% relative water content)							Sporobolus stapﬁanus	Oliver et al.,2011
					Heat shock protein STI	115447567		↓(30% relative water content)							Sporobolus stapﬁanus	Oliver et al.,2011
					Heat shock protein, putative	255570990	GO:0019538				↓(15% soil water, 65d)				Quercus robur L.	Sergeant et al.,2011
					Putative heat shock 70 kDa protein	27476086		↓(30% relative water content)							Sporobolus stapﬁanus	Oliver et al.,2011
					Putative heat shock 70 kDa protein	27476086		↓(30% relative water content)							Sporobolus stapﬁanus	Oliver et al.,2011
					Stromal 70 kDa heat shock-related protein cp	Q02028		↓(dry season, 6 month)							Eucalyptus	Bedon et al., 2012
					Stromal 70 kDa heat shock-related protein cp	Q02028		↓(dry season, 6 month)							Eucalyptus	Bedon et al., 2012
					Stromal 70 kDa heat shock-related protein cp	Q02028		↓(dry season, 6 month)							Eucalyptus	Bedon et al., 2012
					Heat shock 70 kDa protein	115448989		↓(30% relative water content)							Sporobolus stapﬁanus	Oliver et al.,2011
					68 kDa heat-stress DnaK homolog (HSP68)		gi|300265		↓(10% soil water content, 45d, LD)						Populus cathayana	Xiao et al.,2009
					70 kDa heat shock cognate protein 1			↓(not irrigation, 10d, Brilliant)	↑(not irrigation, 15d, Midnight)						Kentucky Bluegrass	Xu et al.,2010
					Chloroplast heat shock protein 70-2	TC299996		↓(drought, 5d, RAC875)		↑(drought, 24d, RAC875)	↑(rewater, 25d, Excalibur)				Triticum aestivum L.	Ford et al., 2011
					Heat shock protein 70	115486793		↓(30% relative water content)							Sporobolus stapﬁanus	Oliver et al.,2011
					Heat shock protein 70	115486793		↓(30% relative water content)							Sporobolus stapﬁanus	Oliver et al.,2011
					Heat shock protein 70	115464309		↓(30% relative water content)							Sporobolus stapﬁanus	Oliver et al.,2011
					Heat shock protein 81-1		gi|158513648		↓(drought, 15d)						Poa pratensis L.	Xu amd Huang, 2012
					Heat shock protein HslU		gi68245294	↓(25% field capacity, 20d)							Hippophae rhamnoides L.	Xu et al.,2009
					Heat shock protein 70		gi|162457723	↑(drought, 10d)	↓(drought, 15d)						Poa pratensis L.	Xu amd Huang, 2012
					Heat shock protein 70		gi|6911551	↑(drought, 10d)	↓(drought, 15d)						Poa pratensis L.	Xu amd Huang, 2012
					Heat shock protein 70				↓(drought, 15d)						Poa pratensis L.	Xu amd Huang, 2012
					Heat shock protein 1 (LOC100501536)	C4J410		↑（withholding water, 9 d）							Zea mays	Sanggon et al., 2015
	Hsp70-Hsp90 organizing protein 2	HOP	2		Hsp70-Hsp90 organizing protein 2	Q9SI76		↓(no irrigation, 14d)							Quercus ilex	Echevarrı´a-Zomen˜o et al., 2009
					hsp70-hsp90 organizing protein 2	AT1G62740		↓(no watering, 3d)	↑(no watering, 7d)	↓(no watering, 10d)	↑(no watering, 14d)				Brassica napus	Koh et al., 2015
	trigger factor-like protein chloroplastic	TIG	1		trigger factor-like protein chloroplastic	AT5G55220			↑(no watering, 7d)	↑(no watering, 10d)	↑(no watering, 14d)				Brassica napus	Koh et al., 2015
	06 Protein storage (12)
	Plastoglobulin	——	1		Plastoglobulin-1		gi|62900628	↑(no irrigation,7d)							Medicago sativa L.	Aranjuelo et al., 2011
	Legumin	——	1		Putative legumin	55168333			↓(30% relative humidity, 72h)						Oryza sativa L.	Pandey et al.,2010
	Glycoprotein	——	2		Stem 28 kDa glycoprotein	P15490.1		↑(10% PEG6000, 4d)							Glycine max L.	Mohammadi et al., 2012
					Stem 31 kDa glycoprotein	P10743.1		↑(10% PEG6000, 4d)	↑(drought,4d)						Glycine max L.	Mohammadi et al., 2012
	Ferritin	Fer	8		Ferritin		gi|21686526	↑(withholding irrigation, 15d, Tifway)	↑(withholding irrigation, 15d, C299)						Cynodon dactylon L. Pers. ×Cynodon transvaalensis Burtt Davy, cv. Tifway,Cynodon dactylon L.	Zhao et al., 2011
					Ferritin	emb|X61391.1|ZMFERRI1	gi|149109235	↑(12.5% soil water, 6d, 2023)↑(12.5% soil water, 6d, CE704)							Zea mays L.	Benesova et al. 2012
					Ferritin		gi|58221595								Poa pratensis L.	Xu amd Huang, 2012
					Ferritin	AAB24082		↑(25% relative humidity, 48h)	↑(25% relative humidity, 120h)	↑(rewater 75% relative humidity, 24h)					Carissa spinarum	Zhang et al.,2010
					Ferritin, plant, putative		gi|223533968			↑(35% soil water, 21d)					Populus tremula L. × P. alba L.-clone INRA 717–1-B4	Bohler,et al., 2013
					Ferritin1A		gi|210061129	↑( PEG6000, 48h)							Triticum aestivum L.	Zhang et al.,2014
					Chloroplastic Ferritin-2 (ZmFer2)		gi|29840837	↑(12.5% soil water, 6d, 2023)↑(12.5% soil water, 6d, CE704)							Zea mays L.	Benesova et al. 2012
					ferritin- chloroplastic-like	AT5G01600		↑(no watering, 3d)	↑(no watering, 7d)	↑(no watering, 10d)					Brassica napus	Koh et al., 2015
	07 Protein degradation (63)
	07.01 Protease	ClpP	7		ATP-dependent Clp protease		gi|18423214		↑(10 % ﬁeld capacity, 5d, # 15163)						Hordeum vulgare L.	Ashoub et al., 2013
					ATP-dependent Clp protease		gi|18423214	↑(10 % ﬁeld capacity, 5d, # 15141)	↑(10 % ﬁeld capacity, 5d, # 15163)						Hordeum vulgare L.	Ashoub et al., 2013
					ATP-dependent Clp protease ATP-binding subunit clpA homolog CD4B, chloroplast precursor		gi|399213	↑(withholding irrigation, 15d, Tifway)	↑(withholding irrigation, 15d, C299)						Cynodon dactylon L. Pers. ×Cynodon transvaalensis Burtt Davy, cv. Tifway,Cynodon dactylon L.	Zhao et al., 2011
					ATP-dependent Clp protease ATP-binding subunit clpC homolog	P35100				↓(no irrigation, 86d)					Populus deltoides×Populus nigra	Bonhomme et al.,2009
					ATP-dependent Clp protease ATP-binding subunit clpC homolog	P35100				↓(no irrigation, 86d)					Populus deltoides×Populus nigra	Bonhomme et al.,2009
					ATP-dependent Clp protease proteolytic subunit-related protein 4	AT4G17040		↑(no watering, 3d)	↑(no watering, 7d)		↓(no watering, 14d)				Brassica napus	Koh et al., 2015
					ATP-dependent Clp protease, ATP-binding subunit	AT5G50920				↑(no watering, 10d)					Brassica napus	Koh et al., 2015
		CP	5		Cysteine proteinase CP2		gi|113208365	↑(no irrigation, 17d, Tiber)							Phaseolus vulgaris	Zadraznik et al.,2013
					Cysteine proteinase precursor		gi|2511691	↑(no irrigation, 17d, Tiber)							Phaseolus vulgaris	Zadraznik et al.,2013
					Cysteine proteinase precursor		gi|2511691	↑(no irrigation, 17d, Starozagorski)							Phaseolus vulgaris	Zadraznik et al.,2013
					Cysteine proteinase precursor		gi|2511691	↑(no irrigation, 17d, Starozagorski)							Phaseolus vulgaris	Zadraznik et al.,2013
					Cysteine protease, putative		gi|255538210			↓(35% soil water, 21d)					Populus tremula L. × P. alba L.-clone INRA 717–1-B4	Bohler,et al., 2013
		MCA	1		Type II metacaspase	TC282514		↑(drought, 5d, RAC875)	↑(drought, 14d, Excalibur)	↑(drought, 24d, Excalibur)↑(drought, 24d, RAC875)	↑(rewater, 25d, Kukri)				Triticum aestivum L.	Ford et al., 2011
		FtsH	7		FtsH protease		gi|18402995		↓(drought, 15d)						Poa pratensis L.	Xu amd Huang, 2012
					FtsH protease		gi|18423214	↓(drought, 10d)	↓(drought, 15d)						Poa pratensis L.	Xu amd Huang, 2012
					FtsH protein		gi|52075838		↓(drought, 15d)						Poa pratensis L.	Xu amd Huang, 2012
					FtsH-like protein		gi|4325041		↓(drought, 15d)						Poa pratensis L.	Xu amd Huang, 2012
					FtsH-like protein Pftf precursor			↓(not irrigation, 10d, Brilliant)	↓(not irrigation, 15d, Brilliant)						Kentucky Bluegrass	Xu et al.,2010
					Cell division protease ftsH homolog (EC 3.4.24.-)	O78516				↑(no irrigation, 86d)					Populus deltoides×Populus nigra	Bonhomme et al.,2009
					Cell division protein ftsH homolog	115470052		↓(30% relative water content)							Sporobolus stapﬁanus	Oliver et al.,2011
		Zmp	4		Zink-metalloprotease (SP-2 type)	ADN33815.1	gi|148930221	↑(12.5% soil water, 6d, 2023)↑(12.5% soil water, 6d, CE704)							Zea mays L.	Benesova et al. 2012
					ATP-dependent zinc metalloprotease chloroplastic	AT1G50250			↑(no watering, 7d)	↑(no watering, 10d)	↑(no watering, 14d)				Brassica napus	Koh et al., 2015
					ATP-dependent zinc metalloprotease FTSH 8, chloroplastic	AT1G06430		↑(no watering, 3d)	↑(no watering, 7d)	↑(no watering, 10d)	↑(no watering, 14d)				Brassica napus	Koh et al., 2015
					ATP-dependent zinc metalloprotease FTSH 8, chloroplastic	AT2G30950				↑(no watering, 10d)					Brassica napus	Koh et al., 2015
		PreP	1		Presequence protease 1		gi|357137982	↑( PEG6000, 48h)							Triticum aestivum L.	Zhang et al.,2014
		Cpl	1		Calpain-like protein		gi|20268662	↑(12.5% soil water, 6d, 2023)↑(12.5% soil water, 6d, CE704)							Zea mays L.	Benesova et al. 2012
		DegP	1		Protease do-like chloroplastic	AT3G27925				↑(no watering, 10d)	↑(no watering, 14d)				Brassica napus	Koh et al., 2015
		Nep	2		Aspartic proteinase a1	AT1G11910				↑(no watering, 10d)					Brassica napus	Koh et al., 2015
					Nepenthesin (aspartic proteinase)	gb|EU963281.1|	gi|149107322	↑(12.5% soil water, 6d, 2023)↑(12.5% soil water, 6d, CE704)							Zea mays L.	Benesova et al. 2012
	07. 02 Peptidase	SCPL	1		Serine carboxypeptidase-like protein			↑(35% RWC)							Gossypium herbaceum L.	Deeba et al., 2012
		OP	3		Oligopeptidase A-like	48716335		↑(30% relative humidity, 48h)	↑(30% relative humidity, 72h)	↑(30% relative humidity, 96h)	↑(30% relative humidity, 120h)	↑(30% relative humidity, 144h)	↑(30% relative humidity, 168h)	↑(30% relative humidity, 192h)	Oryza sativa L.	Pandey et al.,2010
					Oligopeptidase A-like	48716335			↑(30% relative humidity, 72h)	↑(30% relative humidity, 96h)	↑(30% relative humidity, 120h)	↑(30% relative humidity, 144h)	↑(30% relative humidity, 168h)	↑(30% relative humidity, 192h)	Oryza sativa L.	Pandey et al.,2010
					Oligopeptidase A-like	48716335		↑(30% relative humidity, 48h)	↑(30% relative humidity, 72h)	↑(30% relative humidity, 96h)	↑(30% relative humidity, 120h)	↑(30% relative humidity, 144h)	↑(30% relative humidity, 168h)	↑(30% relative humidity, 192h)	Oryza sativa L.	Pandey et al.,2010
		MEP	1		Metalloendopeptidase		gi|22331173	↑(drought, 10d)	↓(drought, 15d)						Poa pratensis L.	Xu amd Huang, 2012
		PMPCB	3		probable mitochondrial-processing peptidase subunit alpha-1	AT1G51980			↓(no watering, 7d)						Brassica napus	Koh et al., 2015
					probable mitochondrial-processing peptidase subunit beta	AT3G02090		↑(no watering, 3d)	↑(no watering, 7d)	↑(no watering, 10d)					Brassica napus	Koh et al., 2015
					Mitochondrial-processing peptidase beta subunit	B6TG70		↑（withholding water, 9 d）							Zea mays	Sanggon et al., 2015
		AP	7		Leucine aminopeptidase 1	TC296779		↓(drought, 5d, RAC875)			↑(rewater, 25d, Excalibur)↑(rewater, 25d, RAC875)				Triticum aestivum L.	Ford et al., 2011
					Chloroplastic leucine aminopeptidase		gi|75261364		↑(10 % ﬁeld capacity, 5d, # 15163,sensitive)						Hordeum vulgare L.	Ashoub et al., 2013
					Chloroplastic leucine aminopeptidase		gi|75261364		↑(10 % ﬁeld capacity, 5d, # 15163,sensitive)						Hordeum vulgare L.	Ashoub et al., 2013
					leucine aminopeptidase 2	AT4G30920			↓(no watering, 7d)		↑(no watering, 14d)				Brassica napus	Koh et al., 2015
					Methionine aminopeptidase 1B	gb|EU964849.1|	gi|101385192	↓(12.5% soil water, 6d, 2023)↑(12.5% soil water, 6d, CE704)							Zea mays L.	Benesova et al. 2012
					Putative aminopeptidase (M1 aminopeptidase)	Q8H0S9				↑(no irrigation, 86d)					Populus deltoides×Populus nigra	Bonhomme et al.,2009
					probable xaa-pro aminopeptidase p (M24)	AT3G05350		↓(no watering, 3d)	↓(no watering, 7d)						Brassica napus	Koh et al., 2015
		PIP	1		Proline iminopeptidase, putative		gi|255562062			↓(35% soil water, 21d)					Populus tremula L. × P. alba L.-clone INRA 717–1-B4	Bohler,et al., 2013
		CTPA1	1		carboxyl-terminal-processing peptidase chloroplastic isoform x1	AT4G17740			↓(no watering, 7d)		↑(no watering, 14d)				Brassica napus	Koh et al., 2015
		—	1		peptidase m20 m25 m40 family protein	AT4G38220		↑(no watering, 3d)		↓(no watering, 10d)					Brassica napus	Koh et al., 2015
	07. 03 Proteasome	20S proteasome	11		Proteasome subunit alpha type-2-A-like		gi|356525754	↑(no irrigation, 17d, Starozagorski, sensitive)							Phaseolus vulgaris	Zadraznik et al.,2013
					Proteasome subunit alpha type-6	Q9LSU3		↑(25% field capacity, 28d, Piriformospora indica-inoculated)							Hordeum vulgare L.	Ghabooli et al.,2013
					20S proteosome alpha 6 subunit	115444057		↓(30% relative water content)							Sporobolus stapﬁanus	Oliver et al.,2011
					Alpha 1 subunit of 20S proteasome	8671492		↓(30% relative humidity, 48h)	↓(30% relative humidity, 72h)		↑(30% relative humidity, 120h)		↓(30% relative humidity, 168h)		Oryza sativa L.	Pandey et al.,2010
					proteasome subunit alpha type-2-a	AT1G16470		↑(no watering, 3d)							Brassica napus	Koh et al., 2015
					proteasome subunit alpha type-5-a	AT1G53850		↑(no watering, 10d)							Brassica napus	Koh et al., 2015
					Proteasome subunit beta type-1 (20S proteasome alpha subunit F) (20S proteasome subunit beta-6)		gi|17380185	↑(no irrigation,7d)							Medicago sativa L.	Aranjuelo et al., 2011
					Proteasome subunit beta type		gi|357466571	↑(no irrigation, 17d, Tiber)							Phaseolus vulgaris	Zadraznik et al.,2013
					Proteasome subunit beta type-3-A	NP_564149.1		↓(drought,4d)							Glycine max L.	Mohammadi et al., 2012
					20S proteasome beta subunit PBG1		gi|3421123			↑(rewater,7d)					Populus tremulaL.×P. albaL.	Durand et al.,2011
					20S proteasome beta subunit PBG1		gi|297843714			↓(35% soil water, 21d)					Populus tremula L. × P. alba L.-clone INRA 717–1-B4	Bohler,et al., 2013
	07. 04 Protease inhibitor	SCI	1		Subtilisin-chymotrypsin inhibitor		gi|162460972	↑(12.5% soil water, 6d, 2023)↑(12.5% soil water, 6d, CE704)							Zea mays L.	Benesova et al. 2012
		KTI	2		kunitz trypsin inhibitor 1	AT1G73260			↑(no watering, 7d)	↑(no watering, 10d)					Brassica napus	Koh et al., 2015
					kunitz trypsin inhibitor 1	AT1G73260					↑(no watering, 14d)				Brassica napus	Koh et al., 2015
		CPI	2		cysteine proteinase inhibitor 6	AT3G12490			↓(no watering, 7d)	↑(no watering, 10d)					Brassica napus	Koh et al., 2015
					Cystatin		gi|162459564	↑(12.5% soil water, 6d, 2023)↑(12.5% soil water, 6d, CE704)							Zea mays L.	Benesova et al. 2012
	08 Cell structure and cell cycle (64)
	Translationally-controlled tumor protein homolog	TCTP	4		Translationally-controlled tumor protein homolog	Q9M5G3		↑(25% field capacity, 28d, Piriformospora indica-inoculated)							Hordeum vulgare L.	Ghabooli et al.,2013
					Translationally-controlled tumor protein homolog	Q9M5G3		↑(25% field capacity, 28d, Piriformospora indica-inoculated)							Hordeum vulgare L.	Ghabooli et al.,2013
					Translationally controlled tumor protein		gi|146285306	↑( PEG6000, 48h)							Triticum aestivum L.	Zhang et al.,2014
					translationally-controlled tumor protein homolog	AT3G16640		↑(no watering, 3d)		↓(no watering, 10d)					Brassica napus	Koh et al., 2015
	Cell division cycle protein	CDC	2		Cell division cycle protein 48		gi|15231775	↑(drought, 10d)	↓(drought, 15d)						Poa pratensis L.	Xu amd Huang, 2012
					cell division protein homolog chloroplastic	AT5G55280		↑(no watering, 3d)	↑(no watering, 7d)	↓(no watering, 10d)					Brassica napus	Koh et al., 2015
	Pastid division protein ftsZ1 precursor	ftsZ1	3		Pastid division protein ftsZ1 precursor	115440503		↓(30% relative water content)							Sporobolus stapﬁanus	Oliver et al.,2011
					Pastid division protein ftsZ1 precursor	115440503		↑(30% relative water content)							Sporobolus stapﬁanus	Oliver et al.,2011
					Plastid division protein ftsZ1 precursor	115454331		↑(30% relative water content)							Sporobolus stapﬁanus	Oliver et al.,2011
	Cyclin-A2	——	1		Cyclin-A2	195644654		↓(stop watering, 7d, B)							Hordeum vulgare L.	Wendelboe-Nelson et al., 2010
	Cullin	——	1		cullin 1	AT4G02570					↑(no watering, 14d)				Brassica napus	Koh et al., 2015
	Actin depolymerizing factor	ADF	1		Actin depolymerization factor-like protein (ADF2)		gi|197359115		↑(withholding irrigation, 15d, C299)						Cynodon dactylon L. Pers. ×Cynodon transvaalensis Burtt Davy, cv. Tifway,Cynodon dactylon L.	Zhao et al., 2011
	Actin	——	14		Actin isoform B	BAA89214.1	GI:6683504	↑(10% PEG6000, 4d)	↑(drought,4d)						Glycine max L.	Mohammadi et al., 2012
					Actin		gi|168472715	↓(20-25% SRWC, 3d)	—	—					Triticum aestivum L.	Wang et al., 2014
					Actin			↑(not irrigation, 10d, Brilliant)	↑(not irrigation, 15d, Brilliant)						Kentucky Bluegrass	Xu et al.,2010
					Actin	ACK87035.1	GI:218533930	↑(drought,4d)							Glycine max L.	Mohammadi et al., 2012
					Actin, putative, expressed			↓(stop irrigation 35d,481-B)							Oryza sativa L.	Raorane et al., 2015
					Actin 7	TC295670									Triticum aestivum L.	Ford et al., 2011
					Actin-7	P53492		↓(dry season, 6 month)							Eucalyptus	Bedon et al., 2012
					Actin	32186900	GO:0015031				↓(15% soil water, 65d)				Quercus robur L.	Sergeant et al.,2011
					Actin		gi|345647450	↓( PEG6000, 48h)							Triticum aestivum L.	Zhang et al.,2014
					Actin		gi|9965319	↓(drought, 10d)	↓(drought, 15d)						Poa pratensis L.	Xu amd Huang, 2012
					Actin		gi|24496452		↓(drought, 15d)						Poa pratensis L.	Xu amd Huang, 2012
					Actin 1	115454971		↓(30% relative water content)							Sporobolus stapﬁanus	Oliver et al.,2011
					Actin 1	115454971		↑(30% relative water content)							Sporobolus stapﬁanus	Oliver et al.,2011
					Putative actin family protein isoform 1	K7VII1		↑（withholding water, 9 d）							Zea mays	Sanggon et al., 2015
	Tubulin	——	9		Tubulin alpha-3 chain	Q9ZRR5.1	GI:8928432	↓(10% PEG6000, 4d)	↓(drought,4d)						Glycine max L.	Mohammadi et al., 2012
					Tubulin alpha-3/alpha-5 chain	NP_197478.1	GI:15241168	↓(drought,4d)							Glycine max L.	Mohammadi et al., 2012
					Tubulin beta-2 chain	P12460.1	GI:135462	↓(drought,4d)							Glycine max L.	Mohammadi et al., 2012
					Alpha-tubulin 3		gi|148362107		↓(10% soil water content, 45d, LD)						Populus cathayana	Xiao et al.,2009
					Tubulin alpha-3/alpha-5 chain	P20363		↓(dry season, 6 month)							Eucalyptus	Bedon et al., 2012
					Tubulin alpha-3/alpha-5 chain	P20363		↓(dry season, 6 month)							Eucalyptus	Bedon et al., 2012
					Tubulin alpha-3/alpha-5 chain	P20363		↓(dry season, 6 month)							Eucalyptus	Bedon et al., 2012
					Tubulin beta8 chain	Q9FF94		↓(dry season, 6 month)							Eucalyptus	Bedon et al., 2012
					Tubulin alpha-3	AT5G19770									Brassica napus	Koh et al., 2015
	Type IIIa membrane protein cp-wap13	——	1		Type IIIa membrane protein cp-wap13		gi|2218152		↓(25% soil water, SAG12-ipt)						Agrostis stolonifera	Merewitz et al., 2011
	Kinesin motor protein	Kinesin	1		Kinesin motor protein	77556073		↓(stop watering, 7d, GP)↓(stop watering, 7d, B)							Hordeum vulgare L.	Wendelboe-Nelson et al., 2010
	Fibrillin	——	1		Fibrillin 4	AT3G23400		↑(no watering, 3d)		↑(no watering, 10d)	↑(no watering, 14d)				Brassica napus	Koh et al., 2015
	Profilin	——	1		Profilin	AT2G19760									Brassica napus	Koh et al., 2015
	Glycine-rich protein	GRP	2		Glycine-rich protein 2	121631	GO:0006255				↓(15% soil water, 65d)				Quercus robur L.	Sergeant et al.,2011
					Glycine-rich protein	AT5G39570			↑(no watering, 7d)	↑(no watering, 10d)	↑(no watering, 14d)				Brassica napus	Koh et al., 2015
	Fasciclin-like arabinogalactan protein 9	FLA9	1		Fasciclin-like arabinogalactan protein 9	AT1G03870			↑(no watering, 7d)						Brassica napus	Koh et al., 2015
	Reversibly Glycosylated polypeptide	RGP	1		Reversibly glycosylated polypeptide		gi|18077708	↑(no irrigation,7d)							Medicago sativa L.	Aranjuelo et al., 2011
	Caffeoyl-CoA O-methyl-transferase （lignin biosynthesis）	CCOMT	2		Caffeoyl-CoA O-methyl-transferase	O65862			↓(25% relative humidity, 120h)						Carissa spinarum	Zhang et al.,2010
					Caffeoyl-CoA O-methyltransferase	O65162		↑(25% field capacity, 28d, non-inoculated)↑(25% field capacity, 28d, Piriformospora indica-inoculated)							Hordeum vulgare L.	Ghabooli et al.,2013
	Caffeic acid 3-O-methyltransferase	COMT	2		Caffeic acid 3-O-methyltransferase	P46484		↓(dry season, 6 month)							Eucalyptus	Bedon et al., 2012
					Caffeic acid 3-O-methyltransferase	NP_001149617.1	gi|149087954	↓(12.5% soil water, 6d, 2023,sensitive)↑(12.5% soil water, 6d, CE704)							Zea mays L.	Benesova et al. 2012
	Polygalacturonase/pectin depolymerase	PG	1		Putative polygalacturonase	55295844		↑(30% relative humidity, 48h)	↑(30% relative humidity, 72h)	↓(30% relative humidity, 96h)					Oryza sativa L.	Pandey et al.,2010
	Xyloglucan endotransglycosylase	XET/XTH	3		Xyloglucan endotransglycosylase/hydrolase precursor XTH-36		gi|124109183		↓(35% soil water, 14d)						Populus tremula L. × P. alba L.-clone INRA 717–1-B4	Bohler,et al., 2013
					Xyloglucan xyloglucosyl transferase (unipro:Xyloglucan endotransglucosylase/hydrolase)	ACS13757.1	gi|148956402	↑(12.5% soil water, 6d, 2023)↑(12.5% soil water, 6d, CE704)							Zea mays L.	Benesova et al. 2012
					Xyloglucan endotransglycosylase (XET)										Triticum aestivum L.	Budak et al.,2013
	Phenylalanine ammonia-lyase	PAL	3		Phenylalanine ammonia-lyase		gi|157041071	↑(10% soil water content, 45d, HY)	↑(10% soil water content, 45d, LD)						Populus cathayana	Xiao et al.,2009
					Phenylalanine ammonia-lyase		gi|119656934		↑(10% soil water content, 45d, LD)						Populus cathayana	Xiao et al.,2009
					Putative phenylalanine ammonia-lyase	48716258			↑(30% relative humidity, 72h)	↑(30% relative humidity, 96h)	↑(30% relative humidity, 120h)	↑(30% relative humidity, 144h)	↑(30% relative humidity, 168h)	↑(30% relative humidity, 192h)	Oryza sativa L.	Pandey et al.,2010
	Pectin acetylesterase	PAE	1		pectinacetylesterase family protein	AT3G05910			↑(no watering, 7d)						Brassica napus	Koh et al., 2015
	Beta-D-glucan exohydrolase	Exol	7		Beta-D-glucan exohydrolase	TC277839			↓(drought, 14d, Excalibur)		↓(rewater, 25d, Excalibur)				Triticum aestivum L.	Ford et al., 2011
					Beta-D-glucan exohydrolase			↓(not irrigation, 10d, Midnight)							Kentucky Bluegrass	Xu et al.,2010
					Beta-D-glucan exohydrolase			↓(not irrigation, 10d, Midnight)							Kentucky Bluegrass	Xu et al.,2010
					Beta-D-glucan exohydrolase, isoenzyme		gi|1203832								Poa pratensis L.	Xu amd Huang, 2012
					Cell wall beta-glucosidase isoenzyme (Beta-D-glucan exohydrolase)			↓(25% soil water, Sag12-ipt)							Agrostis stolonifera	Merewitz et al., 2011
					Cell wall beta-glucosidase		gi|46451431	↑(drought, 10d)	↑(drought, 15d)						Poa pratensis L.	Xu amd Huang, 2012
					non-cyanogenic beta-glucosidase	ACG28509.1	gi|160481639	↑(12.5% soil water, 6d, 2023)↓(12.5% soil water, 6d, CE704)							Zea mays L.	Benesova et al. 2012
	Xylanase inhibitor	XI	1		Xylanase inhibitor (TAXI-IV)	ACG48847.1	gi|149112160	↓(12.5% soil water, 6d, 2023,sensitive)↑(12.5% soil water, 6d, CE704,tolerant)							Zea mays L.	Benesova et al. 2012
	Polygalacturonase inhibitor	PGIP	1		Polygalacturonase inhibitor	NP_001151303.1	gi|149100606	↓(12.5% soil water, 6d, 2023,sensitive)↑(12.5% soil water, 6d, CE704,tolerant)							Zea mays L.	Benesova et al. 2012
	09 Membrane and transport (40)
	2-oxoglutarate/malate carrier protein	OMC	2		2-oxoglutarate/malate carrier protein (mitochondrial)	gb|EU966618.1|	gi|149055762	↓(12.5% soil water, 6d, 2023)↑(12.5% soil water, 6d, CE704)							Zea mays L.	Benesova et al. 2012
					Mitochondrial oxoglutarate/malate carrier protein	XP_002532069.1		↓(10% PEG6000, 4d)							Glycine max L.	Mohammadi et al., 2012
	Dicarboxylate/tricarboxylate carrier	DTC	1		Dicarboxylate/tricarboxylate carrier (DTC)	TC287532		↓(drought, 5d, RAC875)	↓(drought, 14d, Kukri)						Triticum aestivum L.	Ford et al., 2011
	Voltage dependent anion channel	VDAC	4		VDAC1 (voltage dependent anion channel 1)	TC277379		↑(drought, 5d, RAC875)	↑(drought, 14d, Kukri)	↑(drought, 24d, Excalibur)↑(drought, 24d, Kukri)↑(drought, 24d, RAC875)					Triticum aestivum L.	Ford et al., 2011
					VDAC2 (voltage dependent anion channel 2)	TC307500		↑(drought, 5d, RAC875)	↑(drought, 14d, Kukri)	↑(drought, 24d, Excalibur)↑(drought, 24d, Kukri)					Triticum aestivum L.	Ford et al., 2011
					Voltage dependent anion channel (VDAC)	TC287456		↑(drought, 5d, RAC875)		↑(drought, 24d, Excalibur)↑(drought, 24d, RAC875)					Triticum aestivum L.	Ford et al., 2011
					Voltage-dependent anion-selective channel		gi|255558216		↑(rewater, 26d)						Cistus albidus	Brossa et al., 2015
	Mitochondrial outer membrane protein porin	—	2		mitochondrial outer membrane protein porin 1-like	AT3G01280			↑(no watering, 7d)						Brassica napus	Koh et al., 2015
					mitochondrial outer membrane protein porin 1-like	AT3G01280					↑(no watering, 14d)				Brassica napus	Koh et al., 2015
	Adaptin	Ap	1		Adaptin-like protein	gb|EU971310.1|	gi|160481664	↑(12.5% soil water, 6d, 2023)↑(12.5% soil water, 6d, CE704)							Zea mays L.	Benesova et al. 2012
	Aguaporin	AQP	3		Aguaporin PIP2		gi|162459653	↑(12.5% soil water, 6d, 2023)↑(12.5% soil water, 6d, CE704)							Zea mays L.	Benesova et al. 2012
					Aquaporin		gi|29650727	↑(12.5% soil water, 6d, 2023)↑(12.5% soil water, 6d, CE704)							Zea mays L.	Benesova et al. 2012
					Aquaporin PIP2.1	gb|EU959656.1|	gi|149110751	↑(12.5% soil water, 6d, 2023)↑(12.5% soil water, 6d, CE704)							Zea mays L.	Benesova et al. 2012
	Lipid transfer protein	LTP	3		Lipid transfer protein precursor		gi|7012724	↑(no irrigation, 107d)							Cistus albidus	Brossa et al., 2015
					Lipid transfer protein precursor		gi|7012724		↑(rewater, 26d)						Cistus albidus	Brossa et al., 2015
					Non-specific lipid transfer protein PvLTP-24		gi|2347088	↑(no irrigation, 107d)							Cistus albidus	Brossa et al., 2015
	Cadmium/zinc-transporting ATPase	Cd/Zn-transporting ATPase	1		Putative cadmium/zinc-transporting ATPase 2			↓(35% RWC)							Gossypium herbaceum L.	Deeba et al., 2012
	Sugar carrier protein	SUC	1		Sugar carrier protein C	NP_001148007.1	gi|148966293	↑(12.5% soil water, 6d, 2023)↓(12.5% soil water, 6d, CE704)							Zea mays L.	Benesova et al. 2012
	Remorin	REM	8		Remorin	gb|EU964028.1|	gi|149046444	↑(12.5% soil water, 6d, 2023)↑(12.5% soil water, 6d, CE704)							Zea mays L.	Benesova et al. 2012
					Remorin family protein	TC289719		↑(drought, 5d, RAC875)	↑(drought, 14d, Kukri)↓(drought, 5d, RAC875)						Triticum aestivum L.	Ford et al., 2011
					Remorin family protein	TC292219		↑(drought, 5d, RAC875)	↓(drought, 14d, Excalibur)	↑(drought, 24d, Excalibur)↑(drought, 24d, RAC875)	↑(rewater, 25d, Excalibur)↑(rewater, 25d, RAC875)				Triticum aestivum L.	Ford et al., 2011
					Putative remorin 1 protein		gi|56541805	↑(50 % water lost daily, 20 d)							Upland Oryza sativa L.	Rabello et al.,2014
					remorin family protein	AT2G45820			↑(no watering, 7d)	↑(no watering, 10d)					Brassica napus	Koh et al., 2015
					remorin family protein	AT3G61260			↓(no watering, 7d)						Brassica napus	Koh et al., 2015
					remorin family protein	AT2G45820					↑(no watering, 14d)				Brassica napus	Koh et al., 2015
					remorin family protein	AT5G23750					↓(no watering, 14d)				Brassica napus	Koh et al., 2015
	Chloroplast inner envelope protein	IEP	1		Putative chloroplast inner envelope protein		gi|15341602	↑(no irrigation,7d)							Medicago sativa L.	Aranjuelo et al., 2011
	H+-transporting ATP synthase	——	1		H+-transporting ATP synthase chain9, chloroplast	TC278421		↑(drought, 5d, RAC875)		↓(drought, 24d, Excalibur)↓(drought, 24d, Kukri)↓(drought, 24d, RAC875)	↓(rewater, 25d, Excalibur)↓(rewater, 25d, Kukri)				Triticum aestivum L.	Ford et al., 2011
	Vaculor H+-pyrophosphatase	V-PPase	1		Vaculor H+-pyrophosphatase	ADJ67258.1	gi|149008964	↓(12.5% soil water, 6d, 2023)↑(12.5% soil water, 6d, CE704)							Zea mays L.	Benesova et al. 2012
	Vacuolar H+-ATPase a subunit	V-ATPase	9		Vacuolar H+-ATPase A subunit	AB036926			↑(50% relative humidity, 8h)	↑(50% relative humidity, 48h)					Boea hygrometrica	Jiang et al., 2007
					V-H(+)-ATPase subunit A		gi|156616913	↓(no irrigation, 17d, Tiber)							Phaseolus vulgaris	Zadraznik et al.,2013
					V-type proton ATPase		gi|1352830								Poa pratensis L.	Xu amd Huang, 2012
					V-type proton ATPase catalytic subunit A	Q40002		↑(25% field capacity, 28d, Piriformospora indica-inoculated)							Hordeum vulgare L.	Ghabooli et al.,2013
					V-type proton ATPase subunit B1	AT1G20260			↑(no watering, 7d)						Brassica napus	Koh et al., 2015
					Vacuolar proton-ATPase	115444549		↓(30% relative water content)							Sporobolus stapﬁanus	Oliver et al.,2011
					Vacuolar proton-ATPase	115444549		↓(30% relative water content)							Sporobolus stapﬁanus	Oliver et al.,2011
					Vacuolar proton-ATPase		gi|11527563		↓(drought, 15d)						Poa pratensis L.	Xu amd Huang, 2012
					ATP synthase subunit A (vacuolar)	ACG48688.1	gi|149070206	↓(12.5% soil water, 6d, 2023)↑(12.5% soil water, 6d, CE704)							Zea mays L.	Benesova et al. 2012
	ABC Transporter ATPase	——	2		ABC Transporter ATPase	NP_220204		↑(50% relative humidity, 0.5h)	↑(50% relative humidity, 8h)	↑(50% relative humidity, 48h)	↑(rewater, 8h)				Boea hygrometrica	Jiang et al., 2007
					Putative ABCtransporter ATPase		gi|39934289	↓(25% field capacity, 20d)							Hippophae rhamnoides L.	Xu et al.,2009
	10 Photosynthesis and photorespiration (573)
	10.1 Calvin cycle (256)
	Phosphoribulokinase	PRK	22		Phosphoribulokinase	TC285886		↓(drought, 5d, RAC875)	↓(drought, 14d, Kukri)	↓(drought, 24d, Excalibur)↓(drought, 24d, Kukri)↓(drought, 24d, RAC875)	↓(rewater, 25d, Kukri)↓(rewater, 25d, RAC875)				Triticum aestivum L.	Ford et al., 2011
					Phosphoribulokinase	41052955								↓(30% relative humidity, 192h)	Oryza sativa L.	Pandey et al.,2010
					Phosphoribulokinase	41052955		↑(30% relative humidity, 48h)	↑(30% relative humidity, 72h)	↑(30% relative humidity, 96h)	↑(30% relative humidity, 120h)	↑(30% relative humidity, 144h)	↑(30% relative humidity, 168h)	↑(30% relative humidity, 192h)	Oryza sativa L.	Pandey et al.,2010
					Phosphoribulokinase	41052955		↑(30% relative humidity, 48h)	↑(30% relative humidity, 72h)	↑(30% relative humidity, 96h)	↑(30% relative humidity, 120h)	↑(30% relative humidity, 144h)	↑(30% relative humidity, 168h)	↑(30% relative humidity, 192h)	Oryza sativa L.	Pandey et al.,2010
					Phosphoribulokinase	41052955		↑(30% relative humidity, 48h)	↑(30% relative humidity, 72h)	↑(30% relative humidity, 96h)	↑(30% relative humidity, 120h)	↑(30% relative humidity, 144h)	↑(30% relative humidity, 168h)	↑(30% relative humidity, 192h)	Oryza sativa L.	Pandey et al.,2010
					Phosphoribulokinase	41052955			↑(30% relative humidity, 72h)	↑(30% relative humidity, 96h)	↑(30% relative humidity, 120h)			↑(30% relative humidity, 192h)	Oryza sativa L.	Pandey et al.,2010
					Phosphoribulokinase	1885326	GO:0005975				↓(15% soil water, 65d)				Quercus robur L.	Sergeant et al.,2011
					Phosphoribulokinase		gi|1885326	↓(no irrigation,7d)							Medicago sativa L.	Aranjuelo et al., 2011
					Phosphoribulokinase		gi|115448091		↓(withholding irrigation, 15d, C299)						Cynodon dactylon L. Pers. ×Cynodon transvaalensis Burtt Davy, cv. Tifway,Cynodon dactylon L.	Zhao et al., 2011
					Phosphoribulokinase			↑(35% RWC)							Gossypium herbaceum L.	Deeba et al., 2012
					Phosphoribulokinase		gi|21839	↓(drought, 10d)	↓(drought, 15d)						Poa pratensis L.	Xu amd Huang, 2012
					Phosphoribulokinase (Phosphopentokinase)			↓(25% soil water, NT)	↓(25% soil water, SAG12-ipt)						Agrostis stolonifera	Merewitz et al., 2011
					Phosphoribulokinase cp	P27774		↓(dry season, 6 month)							Eucalyptus	Bedon et al., 2012
					Phosphoribulokinase, chloroplast precursor	115448091		↑(30% relative water content)							Sporobolus stapﬁanus	Oliver et al.,2011
					Phosphoribulokinase, chloroplastic	P26302		↓(25% field capacity, 28d, non-inoculated)↓(25% field capacity, 28d, Piriformospora indica-inoculated)							Hordeum vulgare L.	Ghabooli et al.,2013
					Phosphoribulokinase, chloroplastic	P26302		↓(25% field capacity, 28d, non-inoculated)↓(25% field capacity, 28d, Piriformospora indica-inoculated)							Hordeum vulgare L.	Ghabooli et al.,2013
					Phosphoribulokinase, chloroplastic				↓(drought, 15d)						Poa pratensis L.	Xu amd Huang, 2012
					Phosphoribulokinase/Sedoheptulose-1,7-bisphosphatase (SBPase)			↓(not irrigation, 10d, Brilliant)	↓(not irrigation, 15d, Midnight)↓(not irrigation, 15d, Brilliant)						Kentucky Bluegrass	Xu et al.,2010
					Phosphoribulose kinase		gi|117296238	↓(no irrigation, 107d)							Cistus albidus	Brossa et al., 2015
					Phosphoribulokinase		AT1G32060.1	↑(45–55% field capacity, Qinguan)							Malus domestica Borkh.	Zhou et al., 2015
					Phosphoribulokinase/Uridine kinase family protein, expressed			↑(stop irrigation 35d,481-B)							Oryza sativa L.	Raorane et al., 2015
					phosphoribulokinase	AT1G32060				↑(no watering, 10d)	↑(no watering, 14d)				Brassica napus	Koh et al., 2015
	Sedoheptulose-1,7-bisphosphatase	SBPase	13		Chloroplast sedoheptulose-1,7-bisphosphatase		gi|238563983	↓(no irrigation, 107d)							Cistus albidus	Brossa et al., 2015
					Sedoheptulose-1,7-bisphosphatase	27804768		↓(30% relative humidity, 48h)	↓(30% relative humidity, 72h)	↓(30% relative humidity, 96h)	↓(30% relative humidity, 120h)	↓(30% relative humidity, 144h)	↓(30% relative humidity, 168h)	↓(30% relative humidity, 192h)	Oryza sativa L.	Pandey et al.,2010
					Sedoheptulose-1,7-bisphosphatase	TC279319		↓(drought, 5d, Kukri)↓(drought, 5d, RAC875)		↓(drought, 24d, Excalibur)↓(drought, 24d, Kukri)↓(drought, 24d, RAC875)	↓(rewater, 25d, Kukri)↓(rewater, 25d, RAC875)				Triticum aestivum L.	Ford et al., 2011
					Sedoheptulose-1,7-bisphosphatase	242055003	GO:0005975				↓(15% soil water, 65d)				Quercus robur L.	Sergeant et al.,2011
					Sedoheptulose-1,7-bisphosphatase precursor	27804768		↑(30% relative water content)							Sporobolus stapﬁanus	Oliver et al.,2011
					Sedoheptulose-1,7-bisphosphatase precursor		gi|27804768	↓(no irrigation,7d)							Medicago sativa L.	Aranjuelo et al., 2011
					Sedoheptulose-1,7-bisphosphatase precursor		gi|27804768	↓(withholding irrigation, 15d, Tifway)	↓(withholding irrigation, 15d, C299)						Cynodon dactylon L. Pers. ×Cynodon transvaalensis Burtt Davy, cv. Tifway,Cynodon dactylon L.	Zhao et al., 2011
					Sedoheptulose-1,7-bisphosphatase precursor		gi|27804768	↓(withholding irrigation, 15d, Tifway)	↓(withholding irrigation, 15d, C299)						Cynodon dactylon L. Pers. ×Cynodon transvaalensis Burtt Davy, cv. Tifway,Cynodon dactylon L.	Zhao et al., 2011
					Sedoheptulose-bisphosphatase		AT3G55800.1	↑(45–55% field capacity, Qinguan)							Malus domestica Borkh.	Zhou et al., 2015
					Sedoheptulose-bisphosphatase		AT3G55800.1	↑(45–55% field capacity, Qinguan)	↓(45–55% field capacity, Naganofuji No. 2)						Malus domestica Borkh.	Zhou et al., 2015
					Sedoheptulose-bisphosphatase		AT3G55800.1	=	↓(45–55% field capacity, Naganofuji No. 2)						Malus domestica Borkh.	Zhou et al., 2015
					sedoheptulose-1,7-bisphosphatase	AT3G55800		↓(no watering, 3d)							Brassica napus	Koh et al., 2015
					sedoheptulose-1,7-bisphosphatase	AT3G55800		↑(no watering, 3d)	↑(no watering, 7d)	↑(no watering, 10d)	↑(no watering, 14d)				Brassica napus	Koh et al., 2015
	Aldolase	AldP	17		Chloroplastic aldolase										Agrostis stolonifera	Merewitz et al., 2011
					Chloroplastic aldolase			↓(not irrigation, 10d, Brilliant)	↓(not irrigation, 15d, Midnight)↓(not irrigation, 15d, Brilliant)						Kentucky Bluegrass	Xu et al.,2010
					Chloroplastic aldolase			↓(not irrigation, 10d, Brilliant)	↓(not irrigation, 15d, Midnight)↓(not irrigation, 15d, Brilliant)						Kentucky Bluegrass	Xu et al.,2010
					Chloroplastic aldolase	218155		↑(30% relative water content)							Sporobolus stapﬁanus	Oliver et al.,2011
					Chloroplastic aldolase	218155		↑(30% relative water content)							Sporobolus stapﬁanus	Oliver et al.,2011
					Chloroplastic aldolase	218155		↑(30% relative water content)							Sporobolus stapﬁanus	Oliver et al.,2011
					Probable fructose-bisphosphate aldolase 2, chloroplastic-like		gi|356538694	↓(no irrigation, 17d, Starozagorski)							Phaseolus vulgaris	Zadraznik et al.,2013
					Fructose 1,6-bisphosphate aldolase, chloroplast	Q40677			↑(withhold water 43d, TR62266)						Oryza sativa L.	Salekdeh et al., 2002
					Fructose-bisphosphate aldolase 2, chloroplast		gi|461501	↓(withholding irrigation, 15d, Tifway)	↓(withholding irrigation, 15d, C299)						Cynodon dactylon L. Pers. ×Cynodon transvaalensis Burtt Davy, cv. Tifway,Cynodon dactylon L.	Zhao et al., 2011
					Fructose-bisphosphate aldolase, chloroplastic-like		gi|357157399	↓( PEG6000, 48h)							Triticum aestivum L.	Zhang et al.,2014
					Plastidic aldolase		gi|4827251	↓(no irrigation, 107d)							Cistus albidus	Brossa et al., 2015
					Plastidic aldolase NPALDP1 (Fructose-bisphosphate aldolase)		gi|4827251	↓(no irrigation, 17d, Tiber)							Phaseolus vulgaris	Zadraznik et al.,2013
					Plastidic aldolase NPALDP1 (Fructose-bisphosphate aldolase)		gi|4827251	↓(no irrigation, 17d, Tiber)↓(no irrigation, 17d, Starozagorski)							Phaseolus vulgaris	Zadraznik et al.,2013
					Chloroplast fructose-bisphosphate aldolase		gi|223018643	↓(20-25% SRWC, 3d)	↓(35-40% SRWC, 2d+20-25% SRWC, 3d)	↓(35-40% SRWC, 7-9d+35-40% SRWC, 7-9d+20-25% SRWC, 8d)					Triticum aestivum L.	Wang et al., 2014
					Fructose-bisphosphate aldolase	AT2G01140.1		↑(45–55% field capacity, Qinguan)	=						Malus domestica Borkh.	Zhou et al., 2015
					Fructose-bisphosphate aldolase	AT4G38970.1		↑(45–55% field capacity, Qinguan)	↓(45–55% field capacity, Naganofuji No. 2)						Malus domestica Borkh.	Zhou et al., 2015
					Fructose-bisphosphate aldolase, cytoplasmic isozyme 1	B6SSU6		↑（withholding water, 9 d）							Zea mays	Sanggon et al., 2015
	Rubisco subunit binding-protein	——	9		Putative rubisco subunit binding-protein alpha subunit		gi|84468288	↓(no irrigation,7d)							Medicago sativa L.	Aranjuelo et al., 2011
					Rubisco subunit binding protein beta subunit			↓(35% RWC)							Gossypium herbaceum L.	Deeba et al., 2012
					Rubisco subunit binding-protein alpha subunit	115488160		↓(30% relative water content)							Sporobolus stapﬁanus	Oliver et al.,2011
					Rubisco subunit binding-protein alpha subunit	115466004		↓(30% relative water content)							Sporobolus stapﬁanus	Oliver et al.,2011
					Rubisco subunit binding-protein alpha subunit	115468634		↓(30% relative water content)							Sporobolus stapﬁanus	Oliver et al.,2011
					Rubisco subunit binding-protein alpha subunit	115488160		↓(30% relative water content)							Sporobolus stapﬁanus	Oliver et al.,2011
					Rubisco subunit binding-protein beta subunit	115466004		↓(30% relative water content)							Sporobolus stapﬁanus	Oliver et al.,2011
					Rubisco subunit binding-protein beta subunit	XP_002523404.1	GI:255564820	↑(drought,4d)							Glycine max L.	Mohammadi et al., 2012
					Rubisco subunit binding-protein beta subunit	115466004		↓(30% relative water content)							Sporobolus stapﬁanus	Oliver et al.,2011
	Ribulose-1,5-bisphosphate carboxylase/oxygenase activase	RCA	52		Chloroplast ribulose-1,5-bisphosphate carboxylase activase		gi|115392208	↑( PEG6000, 48h)							Triticum aestivum L.	Zhang et al.,2014
					Ribulose bisphosphate carboxylase/oxygenase activase		gi|3914605								Quercus ilex	Valero-Galvan et al.,2013
					Ribulose bisphosphate carboxylase/oxygenase activase 1 cp	Q7X9A0		↓(dry season, 6 month)							Eucalyptus	Bedon et al., 2012
					Ribulose bisphosphate carboxylase/oxygenase activase 1 cp	Q7X9A0		↓(dry season, 6 month)							Eucalyptus	Bedon et al., 2012
					Ribulose bisphosphate carboxylase/oxygenase activase 2, chloroplast (precursor)	Q40565									Quercus ilex	Echevarrı´a-Zomen˜o et al., 2009
					Ribulose bisphosphate carboxylase/oxygenase activase cp	Q40281		↓(dry season, 6 month)							Eucalyptus	Bedon et al., 2012
					Ribulose bisphosphate carboxylase/oxygenase activase cp	Q40281		↓(dry season, 6 month)							Eucalyptus	Bedon et al., 2012
					Ribulose bisphosphate carboxylase/oxygenase activase, chloroplastic		gi|10720248	↓(no irrigation, 17d, Tiber)							Phaseolus vulgaris	Zadraznik et al.,2013
					Ribulose bisphosphate carboxylase/oxygenase activase, chloroplastic		gi|10720248	↓(no irrigation, 17d, Tiber)							Phaseolus vulgaris	Zadraznik et al.,2013
					Ribulose bisphosphate carboxylase/oxygenase activase, chloroplastic		gi|10720248	↓(no irrigation, 17d, Tiber)							Phaseolus vulgaris	Zadraznik et al.,2013
					Ribulose bisphosphate carboxylase/oxygenase activase, chloroplastic		gi|10720248	↓(no irrigation, 17d, Starozagorski)							Phaseolus vulgaris	Zadraznik et al.,2013
					Ribulose bisphosphate carboxylase/oxygenase activase, chloroplastic		gi|10720248	↓(no irrigation, 17d, Starozagorski)							Phaseolus vulgaris	Zadraznik et al.,2013
					Ribulose-1,5-bisphosphate carboxylase/oxygenase activase	Q19RP2				↑(no irrigation, 86d)					Populus deltoides×Populus nigra	Bonhomme et al.,2009
					Ribulose-1,5-bisphosphate carboxylase/oxygenase activase		gi|1778414	↓(50 % water lost daily, 20 d)							Upland Oryza sativa L.	Rabello et al.,2014
					ribulose bisphosphate carboxylase oxygenase activase	AT2G39730		↑(no watering, 3d)	↑(no watering, 7d)	↑(no watering, 10d)	↑(no watering, 14d)				Brassica napus	Koh et al., 2015
					ribulose bisphosphate carboxylase oxygenase activase	AT2G39730		↑(no watering, 3d)	↑(no watering, 7d)	↑(no watering, 10d)	↑(no watering, 14d)				Brassica napus	Koh et al., 2015
					ribulose bisphosphate carboxylase oxygenase activase	AT2G39730				↑(no watering, 10d)					Brassica napus	Koh et al., 2015
					ribulose bisphosphate carboxylase oxygenase activase	AT2G39730		↑(no watering, 3d)		↑(no watering, 10d)	↑(no watering, 14d)				Brassica napus	Koh et al., 2015
					Rubisco activase	TC312724		↓(drought, 5d, RAC875)	↓(drought, 14d, Kukri)	↓(drought, 24d, Excalibur)	↓(rewater, 25d, Excalibur)				Triticum aestivum L.	Ford et al., 2011
					Rubisco activase			↓(not irrigation, 10d, Brilliant)	↓(not irrigation, 15d, Brilliant)						Kentucky Bluegrass	Xu et al.,2010
					Rubisco activase			↓(not irrigation, 10d, Brilliant)	↓(not irrigation, 15d, Midnight)↓(not irrigation, 15d, Brilliant)						Kentucky Bluegrass	Xu et al.,2010
					Rubisco activase		gi|23320705	↓(no irrigation,7d)							Medicago sativa L.	Aranjuelo et al., 2011
					Rubisco activase		gi|37783283	↓(20-25% SRWC, 3d)	↓(35-40% SRWC, 2d+20-25% SRWC, 3d)	↓(35-40% SRWC, 7-9d+35-40% SRWC, 7-9d+20-25% SRWC, 8d)					Triticum aestivum L.	Wang et al., 2014
					Rubisco activase		gi|37783283	—	↓(35-40% SRWC, 2d+20-25% SRWC, 3d)	—					Triticum aestivum L.	Wang et al., 2014
					Rubisco activase	P93431.2		↑(12.5% soil water, 6d, 2023)↑(12.5% soil water, 6d, CE704)							Zea mays L.	Benesova et al. 2012
					Rubisco activase	266893	GO:0015977	↓(15% soil water, 3d)							Quercus robur L.	Sergeant et al.,2011
					Rubisco activase	266893	GO:0015977				↓(15% soil water, 65d)				Quercus robur L.	Sergeant et al.,2011
					Rubisco activase	3914605	GO:0015977								Quercus robur L.	Sergeant et al.,2011
					Rubisco activase	3914605	GO:0015977		↓(15% soil water, 8d)		↓(15% soil water, 8d, 65d)				Quercus robur L.	Sergeant et al.,2011
					Rubisco activase	266893	GO:0015977				↓(15% soil water, 65d)				Quercus robur L.	Sergeant et al.,2011
					Rubisco activase	266893	GO:0015977								Quercus robur L.	Sergeant et al.,2011
					Rubisco activase				↓(25% soil water, SAG12-ipt)						Agrostis stolonifera	Merewitz et al., 2011
					Rubisco activase	ADD60245.1		↓(10% PEG6000, 4d)	↓(drought,4d)						Glycine max L.	Mohammadi et al., 2012
					Rubisco activase		gi|290766483	↑(no irrigation, 17d, Tiber)							Phaseolus vulgaris	Zadraznik et al.,2013
					Rubisco activase	P93431			↑(withhold water 43d, TR62266)						Oryza sativa L.	Salekdeh et al., 2002
					Rubisco activase	P93431			↑(withhold water 43d, CT9993,TR62266)						Oryza sativa L.	Salekdeh et al., 2002
					Rubisco activase (RCA )	AAK25799			↓(25% relative humidity, 120h)						Carissa spinarum	Zhang et al.,2010
					Rubisco activase (RCA )	Q01587		↑(25% relative humidity, 48h, 120h)	↑(25% relative humidity, 120h)	↑(rewater 75% relative humidity, 24h)					Carissa spinarum	Zhang et al.,2010
					RuBisco activase 1			↓(not irrigation, 10d, Brilliant)	↓(not irrigation, 15d, Midnight)↓(not irrigation, 15d, Brilliant)						Kentucky Bluegrass	Xu et al.,2010
					RuBisco activase 1			↓(not irrigation, 10d, Brilliant)	↓(not irrigation, 15d, Midnight)↓(not irrigation, 15d, Brilliant)						Kentucky Bluegrass	Xu et al.,2010
					RuBisco activase 1			↓(25% soil water, NT)							Agrostis stolonifera	Merewitz et al., 2011
					RuBisco activase 1			↓(25% soil water, NT)							Agrostis stolonifera	Merewitz et al., 2011
					RuBisco activase 1	223527225	GO:0015977								Quercus robur L.	Sergeant et al.,2011
					Rubisco activase A, chloroplastic	Q40073		↓(25% field capacity, 28d, Piriformospora indica-inoculated)							Hordeum vulgare L.	Ghabooli et al.,2013
					Rubisco activase A, chloroplastic	Q40073		↓(25% field capacity, 28d, Piriformospora indica-inoculated)							Hordeum vulgare L.	Ghabooli et al.,2013
					Rubisco activase alpha 2		gi|78100212	↓(no irrigation, 107d)							Cistus albidus	Brossa et al., 2015
					Rubisco activase alpha form precursor		gi|32481061	↓(20-25% SRWC, 3d)	↓(35-40% SRWC, 2d+20-25% SRWC, 3d)	↓(35-40% SRWC, 7-9d+35-40% SRWC, 7-9d+20-25% SRWC, 8d)					Triticum aestivum L.	Wang et al., 2014
					Rubisco activase alpha form precursor		gi|32481061	↓(20-25% SRWC, 3d)	↓(35-40% SRWC, 2d+20-25% SRWC, 3d)	↓(35-40% SRWC, 7-9d+35-40% SRWC, 7-9d+20-25% SRWC, 8d)					Triticum aestivum L.	Wang et al., 2014
					Rubisco activase alpha form precursor		gi|32481061	↓(20-25% SRWC, 3d)	↓(35-40% SRWC, 2d+20-25% SRWC, 3d)	↓(35-40% SRWC, 7-9d+35-40% SRWC, 7-9d+20-25% SRWC, 8d)					Triticum aestivum L.	Wang et al., 2014
					Rubisco activase B			↓(not irrigation, 10d, Brilliant)	↓(not irrigation, 15d, Midnight)↓(not irrigation, 15d, Brilliant)						Kentucky Bluegrass	Xu et al.,2010
					Rubisco activase B		gi|7960277	—	↓(35-40% SRWC, 2d+20-25% SRWC, 3d)	↓(35-40% SRWC, 7-9d+35-40% SRWC, 7-9d+20-25% SRWC, 8d)					Triticum aestivum L.	Wang et al., 2014
					Rubisco activase beta form precursor			↓(not irrigation, 10d, Brilliant)	↓(not irrigation, 15d, Brilliant)						Kentucky Bluegrass	Xu et al.,2010
	Ribulose-1,5-bisphosphate carboxylase/oxygenase large subunit	Rubisco LSU	83		Ribulose 1,5-bisphosphate carboxylase large subunit		gi|52001641		↓(withholding water, 12d)	↑(rewater,7d)					Populus tremulaL.×P. albaL.	Durand et al.,2011
					Ribulose 1,5-bisphosphate carboxylase/oxygenase large subunit	TC356437		↓(drought, 5d, RAC875)	↓(drought, 14d, Kukri)↑(drought, 14d, RAC875)	↓(drought, 24d, Excalibur)↓(drought, 24d, Kukri)↓(drought, 24d, RAC875)	↓(rewater, 25d, Kukri)↓(rewater, 25d, RAC875)				Triticum aestivum L.	Ford et al., 2011
					Rubisco breakdown	CAA89998		↑(34% ﬁeld capacity)							Triticum aestivum L.grass (Elymus elongatum)	Gazanchian et al., 2007
					Ribulose bisphosphate carboxylase large chain	Q49KZ0		↑(dry season, 6 month)							Eucalyptus	Bedon et al., 2012
					Ribulose bisphosphate carboxylase large chain precursor		gi|134093207		↑(10% soil water content, 45d, LD)						Populus cathayana	Xiao et al.,2009
					Ribulose bisphosphate carboxylase large chain precursor (EC 4.1.1.39)	A4GYR8				↓(no irrigation, 86d)					Populus deltoides×Populus nigra	Bonhomme et al.,2009
					Ribulose bisphosphate carboxylase large chain precursor, putative	110288945		↓(stop watering, 7d, B)							Hordeum vulgare L.	Wendelboe-Nelson et al., 2010
					Ribulose bisphosphate carboxylase large subunit		gi|125991545			↑(35% soil water, 21d)					Populus tremula L. × P. alba L.-clone INRA 717–1-B4	Bohler,et al., 2013
					Ribulose-1,5-bisphosphate carboxylase/oxygenase large subunit		gi|110227087			↑(35% soil water, 21d)	↓(35% soil water, 28d)				Populus tremula L. × P. alba L.-clone INRA 717–1-B4	Bohler,et al., 2013
					Ribulose-1,5-bisphosphate carboxylase/oxygenase large subunit		gi|110227087		↑(35% soil water, 14d)	↑(35% soil water, 21d)					Populus tremula L. × P. alba L.-clone INRA 717–1-B4	Bohler,et al., 2013
					Ribulose-1,5-bisphosphate carboxylase/oxygenase large subunit		gi|110227087			↑(35% soil water, 21d)					Populus tremula L. × P. alba L.-clone INRA 717–1-B4	Bohler,et al., 2013
					Ribulose-1,5-bisphosphate carboxylase/oxygenase large subunit		gi|110227087			↑(35% soil water, 21d)					Populus tremula L. × P. alba L.-clone INRA 717–1-B4	Bohler,et al., 2013
					Ribulose-1,5-bisphosphate carboxylase/oxygenase large subunit		gi|77798452	↓(35% soil water, 7d)		↑(35% soil water, 21d)					Populus tremula L. × P. alba L.-clone INRA 717–1-B4	Bohler,et al., 2013
					Ribulose-1,5-bisphosphate carboxylase/oxygenase large subunit		gi|188037823		↓(withholding irrigation, 15d, C299)						Cynodon dactylon L. Pers. ×Cynodon transvaalensis Burtt Davy, cv. Tifway,Cynodon dactylon L.	Zhao et al., 2011
					Ribulose-1,5-bisphosphate carboxylase/oxygenase large subunit	gi|116006632		↑(not irrigation, 9d, TTD)							Triticum aestivum L.	Budak et al.,2013
					Ribulose-1,5-bisphosphate carboxylase/oxygenase large subunit	gi|21634101									Triticum aestivum L.	Budak et al.,2013
					Ribulose-1,5-bisphosphate carboxylase/oxygenase large subunit	gi|14017580		↑(not irrigation, 9d, TR)↑(not irrigation, 9d, TTD)↑(not irrigation, 9d, Kn)							Triticum aestivum L.	Budak et al.,2013
					Ribulose-1,5-bisphosphate carboxylase/oxygenase large subunit		gi|167891466			↑(rewater,7d)					Populus tremulaL.×P. albaL.	Durand et al.,2011
					Ribulose-1,5-bisphosphate carboxylase/oxygenase large subunit		gi|167891466			↑(rewater,7d)					Populus tremulaL.×P. albaL.	Durand et al.,2011
					Ribulose-1,5-bisphosphate carboxylase/oxygenase large subunit		gi|188037629			↑(rewater,7d)					Populus tremulaL.×P. albaL.	Durand et al.,2011
					Ribulose-1,5-bisphosphate carboxylase/oxygenase large subunit		gi|30143315		↓(withholding water, 12d)						Populus tremulaL.×P. albaL.	Durand et al.,2011
					Ribulose-1,5-bisphosphate carboxylase/oxygenase large subunit		gi|60101630		↓(withholding water, 12d)						Populus tremulaL.×P. albaL.	Durand et al.,2011
					Ribulose-1,5-bisphosphate carboxylase/oxygenase large subunit	ADQ47556.1	gi|113599488	↓(12.5% soil water, 6d, 2023)↑(12.5% soil water, 6d, CE704)							Zea mays L.	Benesova et al. 2012
					Ribulose-1,5-bisphosphate carboxylase/oxygenase small subunit		gi|4038695		↓(25% soil water, SAG12-ipt)						Agrostis stolonifera	Merewitz et al., 2011
					ribulose- -bisphosphate carboxylase oxygenase large subunit	ATCG00490		↑(no watering, 3d)	↑(no watering, 7d)	↑(no watering, 10d)	↑(no watering, 14d)				Brassica napus	Koh et al., 2015
					ribulose- -bisphosphate carboxylase oxygenase large subunit	ATCG00490		↑(no watering, 3d)	↑(no watering, 7d)	↑(no watering, 10d)	↑(no watering, 14d)				Brassica napus	Koh et al., 2015
					Rubisco large chain	Q33406		↑(25% field capacity, 28d, Piriformospora indica-inoculated)							Hordeum vulgare L.	Ghabooli et al.,2013
					Rubisco large subunit		gi|2654331	↓(no irrigation, 107d)							Cistus albidus	Brossa et al., 2015
					Rubisco large subunit		gi|209418680	↓(no irrigation, 107d)							Cistus albidus	Brossa et al., 2015
					Rubisco large subunit		gi|209418710	↓(no irrigation, 107d)							Cistus albidus	Brossa et al., 2015
					Rubisco large subunit			↓(not irrigation, 10d, Midnight)							Kentucky Bluegrass	Xu et al.,2010
					Rubisco large subunit			↓(not irrigation, 10d, Brilliant)							Kentucky Bluegrass	Xu et al.,2010
					Rubisco large subunit		gi|1352804	↓(no irrigation,7d)							Medicago sativa L.	Aranjuelo et al., 2011
					Rubisco large subunit		gi|112408850	↓(no irrigation,7d)							Medicago sativa L.	Aranjuelo et al., 2011
					Rubisco large subunit		gi|2500654	↓(no irrigation,7d)							Medicago sativa L.	Aranjuelo et al., 2011
					Rubisco large subunit		gi|1865802	↓(no irrigation,7d)							Medicago sativa L.	Aranjuelo et al., 2011
					Rubisco large subunit		gi|144583536		↓(10 % ﬁeld capacity, 5d, # 15163)						Hordeum vulgare L.	Ashoub et al., 2013
					Rubisco large subunit		gi|144583536		↓(10 % ﬁeld capacity, 5d, # 15163)						Hordeum vulgare L.	Ashoub et al., 2013
					Rubisco large subunit		gi|144583536		↓(10 % ﬁeld capacity, 5d, # 15163)						Hordeum vulgare L.	Ashoub et al., 2013
					Rubisco large subunit		gi|118430396	↓(10 % ﬁeld capacity, 5d, # 15141)	↓(10 % ﬁeld capacity, 5d, # 15163)						Hordeum vulgare L.	Ashoub et al., 2013
					Rubisco large subunit	P28440			↑(50% relative humidity, 8h)	↑(50% relative humidity, 48h)		R48h			Boea hygrometrica	Jiang et al., 2007
					Rubisco large subunit		gi|14670019	↓(10% soil water content, 45d, HY)							Populus cathayana	Xiao et al.,2009
					Rubisco large subunit	CAA93037		↑(25% relative humidity, 48h)	↑(25% relative humidity, 120h)	↑(rewater 75% relative humidity, 24h)					Carissa spinarum	Zhang et al.,2010
					Rubisco large subunit	CAG34174			↓(25% relative humidity, 120h)						Carissa spinarum	Zhang et al.,2010
					Rubisco large subunit	AAV37482		↑(25% relative humidity, 48h)	↑(25% relative humidity, 120h)	↑(rewater 75% relative humidity, 24h)					Carissa spinarum	Zhang et al.,2010
					Rubisco large subunit	20257338	GO:0015977			↓(15% soil water, 56d)	↓(15% soil water, 65d)				Quercus robur L.	Sergeant et al.,2011
					Rubisco large subunit	224382632	GO:0015977				↓(15% soil water, 65d)				Quercus robur L.	Sergeant et al.,2011
					Rubisco large subunit	11466795		↓(30% relative water content)							Sporobolus stapﬁanus	Oliver et al.,2011
					Rubisco large subunit	11466795		↓(30% relative water content)							Sporobolus stapﬁanus	Oliver et al.,2011
					Rubisco large subunit	11466795		↓(30% relative water content)							Sporobolus stapﬁanus	Oliver et al.,2011
					Rubisco large subunit	11466795		↓(30% relative water content)							Sporobolus stapﬁanus	Oliver et al.,2011
					Rubisco large subunit			↓(25% soil water, NT)	↑(25% soil water, SAG12-ipt)						Agrostis stolonifera	Merewitz et al., 2011
					Rubisco large subunit			↓(25% soil water, NT)							Agrostis stolonifera	Merewitz et al., 2011
					Rubisco large subunit				↑(25% soil water, SAG12-ipt)						Agrostis stolonifera	Merewitz et al., 2011
					Rubisco large subunit		gi|54306774			↑(rewater,7d)					Populus tremulaL.×P. albaL.	Durand et al.,2011
					Rubisco large subunit	AAV37482		↑(25% relative humidity, 48h)	↑(25% relative humidity, 120h)	↑(rewater 75% relative humidity, 24h)					Carissa spinarum	Zhang et al.,2010
					Rubisco large subunit		gi|31087917		↑(drought, 15d)						Poa pratensis L.	Xu amd Huang, 2012
					Rubisco, large subunit		gi13539641	↑(25% field capacity, 20d)							Hippophae rhamnoides L.	Xu et al.,2009
					Rubisco, large subunit		gi1769843	↑(25% field capacity, 20d)							Hippophae rhamnoides L.	Xu et al.,2009
					Rubisco, large subunit		gi577837	↑(25% field capacity, 20d)							Hippophae rhamnoides L.	Xu et al.,2009
					Rubisco large subunit		gi|61378666	↓(drought, 10d)	↓(drought, 15d)						Poa pratensis L.	Xu amd Huang, 2012
					Rubisco large subunit (fragment)		gi|57283830		↑(drought, 15d)						Poa pratensis L.	Xu amd Huang, 2012
					Rubisco large subunit (fragment)		gi|31087917		↑(drought, 15d)						Poa pratensis L.	Xu amd Huang, 2012
					Rubisco large subunit binding protein subunit alpha cp	P08926		↓(dry season, 6 month)							Eucalyptus	Bedon et al., 2012
					Rubisco large subunit binding protein subunit beta cp	Q37267		↓(dry season, 6 month)							Eucalyptus	Bedon et al., 2012
					Rubisco large subunit binding protein subunit beta cp	P08927		↓(dry season, 6 month)							Eucalyptus	Bedon et al., 2012
					Rubisco large subunit-binding protein (subunit alpha)	gb|EU957583.1|	gi|149004928	↑(12.5% soil water, 6d, 2023)↑(12.5% soil water, 6d, CE704)							Zea mays L.	Benesova et al. 2012
					Rubisco large subunit-binding protein subunit beta		gi|2493650	↓(20-25% SRWC, 3d)	—	↓(35-40% SRWC, 7-9d+35-40% SRWC, 7-9d+20-25% SRWC, 8d)					Triticum aestivum L.	Wang et al., 2014
					RuBisCO large subunit-binding protein subunit beta, (60 kDa chaperonin subunit beta)			↓(25% soil water, NT)							Agrostis stolonifera	Merewitz et al., 2011
					RuBisco large subunit-binding protein subunit beta, chloroplastic-like		gi|356525839	↓(no irrigation, 17d, Tiber)							Phaseolus vulgaris	Zadraznik et al.,2013
					Large subunit of Rubisco		ATCG00490.1	↑(45–55% field capacity, Qinguan)	↓(45–55% field capacity, Naganofuji No. 2)						Malus domestica Borkh.	Zhou et al., 2015
					Rubisco LSU	290770929	GO:0015977			↑(15% soil water, 56d)					Quercus robur L.	Sergeant et al.,2011
					Rubisco LSU		gi|3355776	↑(soil water potential -1.5 MPa, 4d)	↑(soil water potential -3.0 MPa, 7d)						Populus ×euramericana	He et al.,2008
					Rubisco LSU		gi|5688875	↓(soil water potential -1.5 MPa, 4d)	↑(soil water potential -3.0 MPa, 7d)						Populus ×euramericana	He et al.,2008
					Rubisco LSU		gi|5688879	↓(soil water potential -1.5 MPa, 4d)	↑(soil water potential -3.0 MPa, 7d)						Populus ×euramericana	He et al.,2008
					Rubisco LSU		gi|66735793	↑(soil water potential -1.5 MPa, 4d)	↑(soil water potential -3.0 MPa, 7d)						Populus ×euramericana	He et al.,2008
					Rubisco LSU		gi|46242862	↑(soil water potential -1.5 MPa, 4d)	↑(soil water potential -3.0 MPa, 7d)						Populus ×euramericana	He et al.,2008
					Rubisco LSU		gi|44895289	↑(soil water potential -1.5 MPa, 4d)	↑(soil water potential -3.0 MPa, 7d)						Populus ×euramericana	He et al.,2008
					Rubisco LSU		gi|45548959	↑(soil water potential -1.5 MPa, 4d)	↑(soil water potential -3.0 MPa, 7d)						Populus ×euramericana	He et al.,2008
					Rubisco LSU		gi|17976854	↑(soil water potential -1.5 MPa, 4d)	↑(soil water potential -3.0 MPa, 7d)						Populus ×euramericana	He et al.,2008
					Rubisco LSU		gi|67079002	↑(soil water potential -1.5 MPa, 4d)	↑(soil water potential -3.0 MPa, 7d)						Populus ×euramericana	He et al.,2008
					Ribulose bisphosphate carboxylase large chain	P0C510		↓（no irrigation, 20 d）							Oryza sativa L.	Ji et al., 2012
					Ribulose bisphosphate carboxylase large chain precursor, putative,expressed	ABB47308		↓（no irrigation, 20 d）							Oryza sativa L.	Ji et al., 2012
	Ribulose-1,5-bisphosphate carboxylase/oxygenase small subunit	Rubisco SSU	37		Ribulose-1,5-bisphosphate carboxylaseoxygenase activase, small isoform		gi|313574196	↓(withhold water to −2.5 Mpa soil water potential, 3 week)							Hordeum spontaneum	Ashoub et al., 2015
					Ribulose-1,5-bisphosphate carboxylaseoxygenase activase, small isoform		gi|313574196	↓(withhold water to −2.5 Mpa soil water potential, 3 week)							Hordeum spontaneum	Ashoub et al., 2015
					Ribulose-1,5-bisphosphate carboxylaseoxygenase activase, small isoform		gi|313574196	↓(withhold water to −2.5 Mpa soil water potential, 3 week)							Hordeum spontaneum	Ashoub et al., 2015
					Ribulose-bisphosphate carboxylase activase. large isoform precursor		gi|100614	↓(withhold water to −2.5 Mpa soil water potential, 3 week)							Hordeum spontaneum	Ashoub et al., 2015
					Ribulose bisphosphate carboxylase		gi|809069	↓(no irrigation, 17d, Tiber)							Phaseolus vulgaris	Zadraznik et al.,2013
					Ribulose bisphosphate carboxylase		gi|21050	↓(no irrigation, 17d, Starozagorski)							Phaseolus vulgaris	Zadraznik et al.,2013
					Ribulose bisphosphate carboxylase		gi|16194	↓(no irrigation, 107d)							Cistus albidus	Brossa et al., 2015
					Rubisco activase small isform		gi|313574196	↓(20-25% SRWC, 3d)	↓(35-40% SRWC, 2d+20-25% SRWC, 3d)	↓(35-40% SRWC, 7-9d+35-40% SRWC, 7-9d+20-25% SRWC, 8d)					Triticum aestivum L.	Wang et al., 2014
					Rubisco activase small isoform		gi|313574196	↓(20-25% SRWC, 3d)	—	↓(35-40% SRWC, 7-9d+35-40% SRWC, 7-9d+20-25% SRWC, 8d)					Triticum aestivum L.	Wang et al., 2014
					Rubisco activase, chloroplast precursor			↑(not irrigation, 10d, Midnight)	↓(not irrigation, 15d, Brilliant)						Kentucky Bluegrass	Xu et al.,2010
					Rubisco small chain clone 512	P07398		↑(25% field capacity, 28d, non-inoculated)							Hordeum vulgare L.	Ghabooli et al.,2013
					Rubisco small chain clone 512	P07398		↑(25% field capacity, 28d, Piriformospora indica-inoculated)							Hordeum vulgare L.	Ghabooli et al.,2013
					Rubisco small chain clone 512	P07398		↑(25% field capacity, 28d, non-inoculated),↑(25% field capacity, 28d, Piriformospora indica-inoculated)							Hordeum vulgare L.	Ghabooli et al.,2013
					Rubisco small subunit		gi|270383722	↓(no irrigation, 107d)							Cistus albidus	Brossa et al., 2015
					Rubisco small subunit			↓(not irrigation, 10d, Midnight)							Kentucky Bluegrass	Xu et al.,2010
					Rubisco small subunit										Agrostis stolonifera	Merewitz et al., 2011
					Rubisco small subunit										Agrostis stolonifera	Merewitz et al., 2011
					Rubisco small subunit				↓(25% soil water, SAG12-ipt)						Agrostis stolonifera	Merewitz et al., 2011
					Rubisco small subunit										Agrostis stolonifera	Merewitz et al., 2011
					Rubisco small subunit				↑(25% soil water)						Agrostis stolonifera	Merewitz et al., 2011
					Rubisco small subunit				↓(25% soil water, SAG12-ipt)						Agrostis stolonifera	Merewitz et al., 2011
					Rubisco small subunit		gi|11990901	↓(20-25% SRWC, 3d)	—	—					Triticum aestivum L.	Wang et al., 2014
					Rubisco small subunit		gi|132161		↓(10% soil water content, 45d, LD)						Populus cathayana	Xiao et al.,2009
					Rubisco small subunit		gi|6573202		↓(drought, 15d)						Poa pratensis L.	Xu amd Huang, 2012
					Ribulose bisphosphate carboxylase small chain		gi|15219826	↓(no irrigation, 107d)							Cistus albidus	Brossa et al., 2015
					Ribulose bisphosphate carboxylase small chain		gi|132080	↓(no irrigation, 107d)							Cistus albidus	Brossa et al., 2015
					Ribulose bisphosphate carboxylase small chain clone 512 (fragment)	P07398									Hordeum vulgare L.	Ghabooli et al.,2013
					Ribulose bisphosphate carboxylase small chain, chloroplastic		gi|3914607	↑(10% PEG 6000, 14h)							Saccharum officinarum	Zhou et al.,2012
					Rubisco small subunit rbcS3	10946379	GO:0015977								Quercus robur L.	Sergeant et al.,2011
					RBS2; Ribulose bisphosphate carboxylase small chain PW9. chloroplastic	P26667		↓(1/3 of field capacity, 14h, Mutant)							Triticum aestivum L.	Peremarti et al.,2014
					Rubisco small subunit 3B		AT5G38410.1	↑(45–55% field capacity, Qinguan)	=						Malus domestica Borkh.	Zhou et al., 2015
					Rubisco small subunit 3B		AT5G38410.1	↑(45–55% field capacity, Qinguan)	↓(45–55% field capacity, Naganofuji No. 2)						Malus domestica Borkh.	Zhou et al., 2015
					ribulose bisphosphate carboxylase small chain 3b	AT5G38410				↑(no watering, 10d)	↑(no watering, 14d)				Brassica napus	Koh et al., 2015
					ribulose bisphosphate small subunit	AT1G67090		↑(no watering, 3d)	↑(no watering, 7d)	↑(no watering, 10d)	↑(no watering, 14d)				Brassica napus	Koh et al., 2015
					chloroplast ribulose -bisphosphate carboxylase oxygenase small partial	AT5G38430		↑(no watering, 3d)	↑(no watering, 7d)	↑(no watering, 10d)	↑(no watering, 14d)				Brassica napus	Koh et al., 2015
					Ribulose bisphosphate carboxylase/oxygenase activase,chloroplast precursor, putative,expressed	ABG22614		↑（no irrigation, 20 d）							Oryza sativa L.	Ji et al., 2012
					Ribulose bisphosphate carboxylase/oxygenase activase	B6T416		↑（withholding water, 9 d）							Zea mays	Sanggon et al., 2015
	Carbonic anhydrase	CA	23		Carbonic anhydrase		gi|8954289	↓(no irrigation, 107d)							Cistus albidus	Brossa et al., 2015
					Carbonic anhydrase	TC277477		↓(drought, 5d, Excalibur)↓(drought, 5d, Kukri)↓(drought, 5d, RAC875)	↓(drought, 14d, Excalibur)↓(drought, 14d, Kukri)	↓(drought, 24d, Excalibur)↓(drought, 24d, RAC875)	↓(rewater, 25d, Kukri)↓(rewater, 25d, RAC875)				Triticum aestivum L.	Ford et al., 2011
					Carbonic anhydrase		gi|117663160	↓(no irrgation, 3d)							Citrullus lanatus	Akashi et al., 2011
					Carbonic anhydrase	1354517	GO:0006730				↓(15% soil water, 65d)				Quercus robur L.	Sergeant et al.,2011
					Carbonic anhydrase		gi|1354517		↑(withholding water, 12d)	↑(rewater,7d)					Populus tremulaL.×P. albaL.	Durand et al.,2011
					Carbonic anhydrase	ACZ74707.1		↓(10% PEG6000, 4d)	↓(drought,4d)						Glycine max L.	Mohammadi et al., 2012
					Carbonic anhydrase		gi|270342124	↑(no irrigation, 17d, Tiber)↓(no irrigation, 17d, Starozagorski)							Phaseolus vulgaris	Zadraznik et al.,2013
					Carbonic anhydrase		gi|270342124	↓(no irrigation, 17d, Tiber)							Phaseolus vulgaris	Zadraznik et al.,2013
					Carbonic anhydrase		gi|270342124	↓(no irrigation, 17d, Tiber)							Phaseolus vulgaris	Zadraznik et al.,2013
					Carbonic anhydrase		gi|270342124	↓(no irrigation, 17d, Tiber)							Phaseolus vulgaris	Zadraznik et al.,2013
					Carbonic anhydrase		gi|270342124	↑(no irrigation, 17d, Tiber)							Phaseolus vulgaris	Zadraznik et al.,2013
					Carbonic anhydrase	Q41088		↓(25% field capacity, 18d)							Populus deltoides×Populus nigra	Bonhomme et al.,2009
					Carbonic anhydrase cp	P17067		↓(dry season, 6 month)							Eucalyptus	Bedon et al., 2012
					Carbonic anhydrase cp	P17067		↓(dry season, 6 month)							Eucalyptus	Bedon et al., 2012
					Carbonic anhydrase, chloroplast precursor			↑(25% soil water, NT)							Agrostis stolonifera	Merewitz et al., 2011
					Carbonic anhydrase, chloroplast precursor			↑(not irrigation, 10d, Midnight)↓(not irrigation, 10d, Brilliant)	↑(not irrigation, 15d, Brilliant)						Kentucky Bluegrass	Xu et al.,2010
					Carbonic anhydrase, chloroplast precursor			↑(not irrigation, 10d, Brilliant)	↑(not irrigation, 15d, Brilliant)						Kentucky Bluegrass	Xu et al.,2010
					Carbonic anhydrase, chloroplast precursor			↑(not irrigation, 10d, Midnight)↑(not irrigation, 10d, Brilliant)	↑(not irrigation, 15d, Brilliant)						Kentucky Bluegrass	Xu et al.,2010
					Carbonic anhydrase, chloroplastic		gi|115472	↓(no irrigation, 107d)							Cistus albidus	Brossa et al., 2015
					Carbonic anhydrase, chloroplastic	P40880		↑(25% field capacity, 28d, Piriformospora indica-inoculated)							Hordeum vulgare L.	Ghabooli et al.,2013
					Gamma carbonic anhydrase 1	NP_564091		↑(10% PEG6000, 4d)	↑(drought,4d)						Glycine max L.	Mohammadi et al., 2012
					carbonic anhydrase 2	AT5G14740		↑(no watering, 3d)	↓(no watering, 7d)		↑(no watering, 14d)				Brassica napus	Koh et al., 2015
					carbonic anhydrase 1	AT3G01500		↑(no watering, 3d)		↑(no watering, 10d)	↑(no watering, 14d)				Brassica napus	Koh et al., 2015
	10.2 Photoreaction (250)
	Light-harvesting chlorophyll a/b-binding protein	LHCB	64		Chlorophyll a/b binding protein		gi|115467828		↓(withholding irrigation, 15d, C299)						Cynodon dactylon L. Pers. ×Cynodon transvaalensis Burtt Davy, cv. Tifway,Cynodon dactylon L.	Zhao et al., 2011
					Chlorophyll a/b binding protein		gi|14423661		↓(drought, 15d)						Poa pratensis L.	Xu amd Huang, 2012
					Chlorophyll a/b binding protein		gi|115825		↓(drought, 15d)						Poa pratensis L.	Xu amd Huang, 2012
					Chlorophyll a/b binding protein	XP_002533251.1	GI:255585090	↓(drought,4d)							Glycine max L.	Mohammadi et al., 2012
					Chlorophyll a/b binding protein	AAA80688	GI:1053216	↓(10% PEG6000, 4d)							Glycine max L.	Mohammadi et al., 2012
					Chlorophyll a/b binding protein				↓(drought, 15d)						Poa pratensis L.	Xu amd Huang, 2012
					Chlorophyll a/b binding protein		gi|3126854		↑(drought, 15d)						Poa pratensis L.	Xu amd Huang, 2012
					Chlorophyll a/b binding protein 1, chloroplast precursor		gi|115771		↓(withholding irrigation, 15d, C299)						Cynodon dactylon L. Pers. ×Cynodon transvaalensis Burtt Davy, cv. Tifway,Cynodon dactylon L.	Zhao et al., 2011
					Chlorophyll a/b binding protein 1B, chloroplastic-like		gi|565405260	↓(withhold water to −2.5 Mpa soil water potential, 3 week)							Hordeum spontaneum	Ashoub et al., 2015
					Chlorophyll a/b binding protein of LHCII		gi|14423661	↓(drought, 10d)	↓(drought, 15d)						Poa pratensis L.	Xu amd Huang, 2012
					Chlorophyll a–b binding protein 1B-21, chloroplastic	Q9SDM1		↑(25% field capacity, 28d, Piriformospora indica-inoculated)							Hordeum vulgare L.	Ghabooli et al.,2013
					Chlorophyll a-b binding protein 1B-21. chloroplastic (CAB 1B-21)	Q9SDM1		↓(1/3 of field capacity, 14h, Mutant)							Triticum aestivum L.	Peremarti et al.,2014
					Chlorophyll a–b binding protein 22R, chloroplastic	P04781		↓(25% field capacity, 28d, non-inoculated)							Hordeum vulgare L.	Ghabooli et al.,2013
					Chlorophyll a-b binding protein 3 (lhcbII type 1)		gi|158562859		↑(withholding water, 12d)	↑(rewater,7d)					Populus tremulaL.×P. albaL.	Durand et al.,2011
					Chlorophyll a-b binding protein 6A, chloroplastic		gi|115764	↑(no irrigation, 17d, Tiber)							Phaseolus vulgaris	Zadraznik et al.,2013
					Chlorophyll a–b binding protein 8, chloroplastic	P27522		↑(25% field capacity, 28d, Piriformospora indica-inoculated)							Hordeum vulgare L.	Ghabooli et al.,2013
					PSI type III chlorophyll a/b-binding protein		gi|430947		↑(25% soil water, SAG12-ipt)						Agrostis stolonifera	Merewitz et al., 2011
					Chloroplast chlorophyll a/b-binding protein precursor				↑(25% soil water, SAG12-ipt)						Agrostis stolonifera	Merewitz et al., 2011
					CP26 (Lhcb5 - chlorophyll a/b-binding protein, photosystem II)	NP_001105374.1	gi|148995850	↓(12.5% soil water, 6d, 2023)↑(12.5% soil water, 6d, CE704)							Zea mays L.	Benesova et al. 2012
					CP26 (Lhcb5 - chlorophyll a/b-binding protein, photosystem II)	NP_001105698.1	gi|148936738	↓(12.5% soil water, 6d, 2023)↑(12.5% soil water, 6d, CE704)							Zea mays L.	Benesova et al. 2012
					CP29 (Lhcb4 - chlorophyll a/b-binding protein, photosystem II)		gi|957271	↓(12.5% soil water, 6d, 2023)↑(12.5% soil water, 6d, CE704)							Zea mays L.	Benesova et al. 2012
					CP29 (Lhcb4 - chlorophyll a/b-binding protein, photosystem II)	NP_001105502.1	gi|149107270	↓(12.5% soil water, 6d, 2023)↑(12.5% soil water, 6d, CE704)							Zea mays L.	Benesova et al. 2012
					Chloroplast light-harvesting chlorophyll a/b binding protein (Lhc II typeI CAB)	ADL41158a		↓(1/3 of field capacity, 14h, Wild)↓(1/3 of field capacity, 14h, Mutant)							Triticum aestivum L.	Peremarti et al.,2014
					Lhca3 (photosystem I light harvesting complex subunit A3)	TC278227		↓(drought, 5d, RAC875)	↓(drought, 14d, Kukri)	↓(drought, 24d, Excalibur)↓(drought, 24d, Kukri)↓(drought, 24d, RAC875)	↓(rewater, 25d, Kukri)				Triticum aestivum L.	Ford et al., 2011
					Lhca4 (photosystem I light-harvesting complex I subunit A4)	TC277936		↓(drought, 5d, Kukri)		↓(drought, 24d, Excalibur)↓(drought, 24d, RAC875)					Triticum aestivum L.	Ford et al., 2011
					Lhcb4 (light-harvesting complex of photosystem II subunit 4)	TC281303		↓(drought, 5d, Kukri)	↓(drought, 14d, Kukri)	↓(drought, 24d, Excalibur)↓(drought, 24d, Kukri)↓(drought, 24d, RAC875)					Triticum aestivum L.	Ford et al., 2011
					Lhcb5 (light-harvesting complex of photosystem II subunit 5)	TC277490		↓(drought, 5d, Kukri)	↓(drought, 14d, Kukri)	↓(drought, 24d, Excalibur)↓(drought, 24d, Kukri)↓(drought, 24d, RAC875)	↓(rewater, 25d, Kukri)				Triticum aestivum L.	Ford et al., 2011
					LHCII type I chlorophyll a/b binding protein		gi|8954293	↓(not irrigation, 28d, GSE)↓(not irrigation, 28d, SSE)							Quercus ilex	Valero-Galvan et al.,2013
					chlorophyll a b binding protein 1	AT1G29930			↑(no watering, 7d)	↑(no watering, 10d)	↑(no watering, 14d)				Brassica napus	Koh et al., 2015
					chlorophyll a b-binding protein cp29	AT3G08940			↑(no watering, 7d)	↑(no watering, 10d)	↑(no watering, 14d)				Brassica napus	Koh et al., 2015
					chlorophyll a b-binding protein cp29	AT5G01530					↑(no watering, 14d)				Brassica napus	Koh et al., 2015
					chlorophyll a-b binding protein 6	AT3G54890					↓(no watering, 14d)				Brassica napus	Koh et al., 2015
					chlorophyll a-b binding protein chloroplastic	AT2G40100		↓(no watering, 3d)		↑(no watering, 10d)					Brassica napus	Koh et al., 2015
					chlorophyll a-b binding protein chloroplastic	AT3G27690			↑(no watering, 7d)	↓(no watering, 10d)					Brassica napus	Koh et al., 2015
					chlorophyll a-b binding protein chloroplastic	AT4G10340			↑(no watering, 7d)						Brassica napus	Koh et al., 2015
					chlorophyll a-b binding protein cp24 chloroplastic-like	AT1G15820			↑(no watering, 7d)	↑(no watering, 10d)					Brassica napus	Koh et al., 2015
					psi type iii chlorophyll a b-binding protein	AT1G61520			↓(no watering, 7d)						Brassica napus	Koh et al., 2015
					photosystem ii type i chlorophyll a b binding protein	AT2G34430		↓(no watering, 3d)		↑(no watering, 10d)					Brassica napus	Koh et al., 2015
					Light-harvesting complex I protein Lhca3		gi|224131950	↓(no irrigation, 107d)							Cistus albidus	Brossa et al., 2015
					Light-harvesting complex I protein Lhca3		gi|224131950			↑(rewater,7d)					Populus tremulaL.×P. albaL.	Durand et al.,2011
					Light-harvesting complex I protein Lhca3		gi|224131950			↑(rewater,7d)					Populus tremulaL.×P. albaL.	Durand et al.,2011
					Light-harvesting complex I; LHC I		gi|544700		↑(25% soil water, SAG12-ipt)						Agrostis stolonifera	Merewitz et al., 2011
					Light-harvesting complex I; LHC I		gi|544700		↓(drought, 15d)						Poa pratensis L.	Xu amd Huang, 2012
					Light-harvesting complex II protein Lhcb1		gi|224085884		↑(withholding water, 12d)	↑(rewater,7d)					Populus tremulaL.×P. albaL.	Durand et al.,2011
					Light-harvesting complex II protein Lhcb1		gi|224085884		↑(withholding water, 12d)	↑(rewater,7d)					Populus tremulaL.×P. albaL.	Durand et al.,2011
					Light-harvesting complex II protein Lhcb1		gi|224085884		↑(withholding water, 12d)	↑(rewater,7d)					Populus tremulaL.×P. albaL.	Durand et al.,2011
					Precursor of CP29. core chlorophyll a/b binding (CAB) protein (PSII Lhc4)	CAA44777a		↑(1/3 of field capacity, 14h, Wild)↑(1/3 of field capacity, 14h, Mutant)							Triticum aestivum L.	Peremarti et al.,2014
					Chlorophyll binding protein		gi|15220615	↓(drought, 10d)	↓(drought, 15d)						Poa pratensis L.	Xu amd Huang, 2012
					Type I chlorophyll a/b-binding protein b		gi|13676406	↓(withhold water to −2.5 Mpa soil water potential, 3 week)							Hordeum spontaneum	Ashoub et al., 2015
					Type II light-harvesting chlorophyll a/b-binding protein	218174		↑(30% relative water content)							Sporobolus stapﬁanus	Oliver et al.,2011
					Photosystem I.LHC-I, LHCA4	AT3G47470.1		↑(45–55% field capacity, Qinguan)	=						Malus domestica Borkh.	Zhou et al., 2015
					Photosystem I.LHC-I, LHCA3	AT1G61520.3		↑(45–55% field capacity, Qinguan)	↓(45–55% field capacity, Naganofuji No. 2)						Malus domestica Borkh.	Zhou et al., 2015
					Photosystem I.LHC-I,chlorophyll-binding, LHCA1	AT3G54890.1		↑(45–55% field capacity, Qinguan)	=						Malus domestica Borkh.	Zhou et al., 2015
					Photosystem II.LHC-II, LHCB5	AT4G10340.1		↑(45–55% field capacity, Qinguan)	=						Malus domestica Borkh.	Zhou et al., 2015
					Photosystem II.LHC-II	AT2G40100.1		↑(45–55% field capacity, Qinguan)	↓(45–55% field capacity, Naganofuji No. 2)						Malus domestica Borkh.	Zhou et al., 2015
					Photosystem II.LHC-II	AT1G15820.1		↑(45–55% field capacity, Qinguan)	=						Malus domestica Borkh.	Zhou et al., 2015
					Photosystem II.LHC-II	AT1G29930.1		↑(45–55% field capacity, Qinguan)	=						Malus domestica Borkh.	Zhou et al., 2015
					Photosystem II.LHC-II	AT1G29930.1		↑(45–55% field capacity, Qinguan)	=						Malus domestica Borkh.	Zhou et al., 2015
					Photosystem II.LHC-II	AT2G05070.1		↑(45–55% field capacity, Qinguan)	=						Malus domestica Borkh.	Zhou et al., 2015
					Photosystem II.LHC-II	AT2G34430.1		↑(45–55% field capacity, Qinguan)	=						Malus domestica Borkh.	Zhou et al., 2015
					Photosystem II.LHC-II	AT5G01530.1		↑(45–55% field capacity, Qinguan)	=						Malus domestica Borkh.	Zhou et al., 2015
					II.LHC-II			=	↑(45–55% field capacity, Naganofuji No. 2)						Malus domestica Borkh.	Zhou et al., 2015
					II.LHC-II			=	↑(45–55% field capacity, Naganofuji No. 2)						Malus domestica Borkh.	Zhou et al., 2015
					light harvesting complex photosystem ii subunit 6	AT1G15820		↑(no watering, 3d)	↑(no watering, 7d)	↓(no watering, 10d)	↑(no watering, 14d)				Brassica napus	Koh et al., 2015
	Chloroplast manganese stabilizing protein	MSP	1		Chloroplast manganese stabilizing protein	ADR71223.1	GI:313586398	↓(drought,4d)							Glycine max L.	Mohammadi et al., 2012
	Ferredoxin	Fd	6		Ferredoxin		gi|48374987	↓(12.5% soil water, 6d, 2023)↑(12.5% soil water, 6d, CE704)							Zea mays L.	Benesova et al. 2012
					Possible: ferredoxin		gi|162458489	↓(25% soil water, NT)							Agrostis stolonifera	Merewitz et al., 2011
					Ferredoxin-6	gb|EU954487.1|	gi|148945786	↑(12.5% soil water, 6d, 2023)↑(12.5% soil water, 6d, CE704)							Zea mays L.	Benesova et al. 2012
					Ferredoxin		AT1G02180.1	=	↑(45–55% field capacity, Naganofuji No. 2)						Malus domestica Borkh.	Zhou et al., 2015
					Ferritin-1,chloroplast precursor	Q8RX97			↓(25% relative humidity, 120h)	↓(rewater 75% relative humidity, 24h)					Carissa spinarum	Zhang et al.,2010
					Chloroplastic ferredoxin		AT1G60950.1	=	↑(45–55% field capacity, Naganofuji No. 2)						Malus domestica Borkh.	Zhou et al., 2015
	Chloroplast ferredoxin-NADP + oxidoreductase	FNR	22		Chloroplast ferredoxin-NADP + oxidoreductase precursor		gi|6899972								Poa pratensis L.	Xu amd Huang, 2012
					Chloroplast ferredoxin-NADP + reductase		gi|141448056	↓(no irrigation, 17d, Starozagorski)							Phaseolus vulgaris	Zadraznik et al.,2013
					Chloroplast ferredoxin-NADP+oxidoreductase precursor		gi|6899972		↓(withholding water, 12d)						Populus tremulaL.×P. albaL.	Durand et al.,2011
					Ferredoxin-NADP + reductase		gi|110740921		↓(10% soil water content, 45d, LD)						Populus cathayana	Xiao et al.,2009
					Ferredoxin-NADP reductase	ACG35645.1	gi|148968309	↓(12.5% soil water, 6d, 2023)↓(12.5% soil water, 6d, CE704)							Zea mays L.	Benesova et al. 2012
					Ferredoxin-NADP reductase	gb|EU961740.1|	gi|149073444	↓(12.5% soil water, 6d, 2023)↓(12.5% soil water, 6d, CE704)							Zea mays L.	Benesova et al. 2012
					Ferredoxin-NADP reductase		gi|4930123	↓(10% soil water content, 45d, HY)	↓(10% soil water content, 45d, LD)						Populus cathayana	Xiao et al.,2009
					Ferredoxin-NADP(H) oxidoreductase			↓(not irrigation, 10d, Brilliant)	↓(not irrigation, 15d, Midnight)↓(not irrigation, 15d, Brilliant)						Kentucky Bluegrass	Xu et al.,2010
					Ferredoxin-NADP(H) oxidoreductase			↓(25% soil water, NT)	↓(25% soil water, SAG12-ipt)						Agrostis stolonifera	Merewitz et al., 2011
					Ferredoxin-NADP(H) oxidoreductase	gi|20302471		↓(not irrigation, 9d, TR)↓(not irrigation, 9d, TTD)↑(not irrigation, 9d, Kn)							Triticum aestivum L.	Budak et al.,2013
					Ferredoxin-NADP(H) oxidoreductase	gi|20302473		↓(not irrigation, 9d, TR)↓(not irrigation, 9d, TTD)↓(not irrigation, 9d, Kn)							Triticum aestivum L.	Budak et al.,2013
					Ferredoxin-NADP(H) oxidoreductase	gi|20302471		↓(not irrigation, 9d, TR)↓(not irrigation, 9d, TTD)↓(not irrigation, 9d, Kn)							Triticum aestivum L.	Budak et al.,2013
					Putative ferredoxin-NADP(H) oxidoreductase	41052915				↑(30% relative humidity, 96h)					Oryza sativa L.	Pandey et al.,2010
					Putative ferredoxin-NADP(H) oxidoreductase	41052915			↓(30% relative humidity, 72h)	↓(30% relative humidity, 96h)					Oryza sativa L.	Pandey et al.,2010
					FNR1 (ferredoxin-NADP(+)-oxireductase 1)	TC309636			↓(drought, 14d, Kukri)	↓(drought, 24d, Kukri)	↓(rewater, 25d, Kukri)				Triticum aestivum L.	Ford et al., 2011
					FNR2 (ferredoxin-NADP(+)-oxireductase 2)	TC279241				↓(drought, 24d, Excalibur)↓(drought, 24d, Kukri)↓(drought, 24d, RAC875)	↓(rewater, 25d, Excalibur)↓(rewater, 25d, RAC875)				Triticum aestivum L.	Ford et al., 2011
					FNR2 (ferredoxin-NADP(+)-oxireductase 2)	TC297240			↓(drought, 14d, Kukri)	↓(drought, 24d, Excalibur)↓(drought, 24d, Kukri)↓(drought, 24d, RAC875)	↓(rewater, 25d, Kukri)↓(rewater, 25d, RAC875)				Triticum aestivum L.	Ford et al., 2011
					predicted protein/ Hordeum vulgare ssp. vulgare homologous to chloroplastic Ferredoxin-NADP reductase		gi|326492141	↓(withhold water to −2.5 Mpa soil water potential, 3 week)							Hordeum spontaneum	Ashoub et al., 2015
					Ferredoxin–NADP reductase, chloroplast precursor, putative, expressed			↓(stop irrigation 35d,481-B)			Downregulated				Oryza sativa L.	Raorane et al., 2015
					Ferredoxin–NADP reductase, chloroplast precursor, putative, expressed			↑(stop irrigation 35d,481-B)			Upregulated				Oryza sativa L.	Raorane et al., 2015
					Ferredoxin-NADP reductase, leaf isozyme 1,chloroplast (leaf FNR 1)	AT5G66190				↑(no watering, 10d)					Brassica napus	Koh et al., 2015
					ferredoxin--nadp leaf isozyme 2	AT1G20020			↑(no watering, 7d)	↑(no watering, 10d)	↑(no watering, 14d)				Brassica napus	Koh et al., 2015
	Cytochrome b6f complex	Cyt b6f	13		Cytochrome f	TC277658				↓(drought, 24d, Kukri)↓(drought, 24d, RAC875)	↓(rewater, 25d, Kukri)				Triticum aestivum L.	Ford et al., 2011
					Cytochrome b6-f complex iron-sulfur subunit, chloroplast precursor (Rieske iron-sulfur protein)			↓(25% soil water, NT)							Agrostis stolonifera	Merewitz et al., 2011
					Cytochrome b6-f complex iron-sulfur subunit, chloroplastic		gi|136707	↑(no irrigation, 107d)							Cistus albidus	Brossa et al., 2015
					Iron–sulfur subunit of cytochrome b6-f complex, chloroplastic		gi|68566191	↑( PEG6000, 48h)							Triticum aestivum L.	Zhang et al.,2014
					Iron–sulfur subunit of cytochrome b6-f complex, chloroplastic		gi|68566191	↑( PEG6000, 48h)							Triticum aestivum L.	Zhang et al.,2014
					Photosynthetic electron transfer C	AT4G03280.1		↑(45–55% field capacity, Qinguan)	=						Malus domestica Borkh.	Zhou et al., 2015
					Photosynthetic electron transfer C	AT4G03280.1		↑(45–55% field capacity, Qinguan)	=						Malus domestica Borkh.	Zhou et al., 2015
					Cytochrome f apoprotein	ATCG00540.1		↑(45–55% field capacity, Qinguan)	=						Malus domestica Borkh.	Zhou et al., 2015
					cytochrome b6-f complex iron-sulfur chloroplastic-like	AT4G03280		↑(no watering, 3d)		↑(no watering, 10d)					Brassica napus	Koh et al., 2015
					cytochrome b6-f complex iron-sulfur subunit	AT4G03280			↓(no watering, 7d)	↓(no watering, 10d)	↑(no watering, 14d)				Brassica napus	Koh et al., 2015
					cytochrome f	ATCG00540		↑(no watering, 3d)	↑(no watering, 7d)	↑(no watering, 10d)					Brassica napus	Koh et al., 2015
					cytochrome f	ATCG00540				↓(no watering, 10d)					Brassica napus	Koh et al., 2015
					Cytochrome b6-f complex iron-sulfur subunit	B6STK3		↑（withholding water, 9 d）							Zea mays	Sanggon et al., 2015
	Plastocyanin	PC	5		Plastocyanin	gb|EU955634.1|	gi|101389196	↓(12.5% soil water, 6d, 2023)↓(12.5% soil water, 6d, CE704)							Zea mays L.	Benesova et al. 2012
					Plastocyanin	gb|EU955634.1|	gi|149206150	↓(12.5% soil water, 6d, 2023)↓(12.5% soil water, 6d, CE704)							Zea mays L.	Benesova et al. 2012
					Plastocyanin	130277	GO:0015979			↑(15% soil water, 56d)					Quercus robur L.	Sergeant et al.,2011
					Plastocyanin1	AT1G76100.1		↓(45–55% field capacity, Qinguan)	=						Malus domestica Borkh.	Zhou et al., 2015
					Plastocyanin, chloroplast precursor, putative, expressed			↓(stop irrigation 35d,481-B)			Downregulated				Oryza sativa L.	Raorane et al., 2015
	Oxygen-evolving complex protein	OEC	58		Oxygen-evolving enhancer protein, chloroplastic	AAV74404.1	GI:56122682	↓(10% PEG6000, 4d)							Glycine max L.	Mohammadi et al., 2012
					Oxygen-evolving enhancer protein 1, chloroplastic		gi|346230039	↓(no irrigation, 107d)							Cistus albidus	Brossa et al., 2015
					Oxygen evolving enhancer protein 1 (Precursor)	Q9LRC4		↓(no irrigation, 14d)							Quercus ilex	Echevarrı´a-Zomen˜o et al., 2009
					Oxygen-evolving complex protein 1				↓(not irrigation, 15d, Brilliant)						Kentucky Bluegrass	Xu et al.,2010
					Oxygen-evolving complex protein 1			↑(not irrigation, 10d, Midnight)↓(not irrigation, 10d, Brilliant)	↓(not irrigation, 15d, Brilliant)						Kentucky Bluegrass	Xu et al.,2010
					Oxygen-evolving complex protein 1 (OEE1)			↓(25% soil water, NT)							Agrostis stolonifera	Merewitz et al., 2011
					Oxygen-evolving enhancer protein		gi|357494079	↑(no irrigation, 17d, Tiber)							Phaseolus vulgaris	Zadraznik et al.,2013
					Oxygen-evolving enhancer protein 1		gi|357111487	↑(20-25% SRWC, 3d)	—	↑(35-40% SRWC, 7-9d+35-40% SRWC, 7-9d+20-25% SRWC, 8d)					Triticum aestivum L.	Wang et al., 2014
					Oxygen-evolving enhancer protein 1		gi|131385	↑(no irrgation, 3d)							Citrullus lanatus	Akashi et al., 2011
					Oxygen-evolving enhancer protein 1		gi|195619530	↑(no irrigation, 17d, Tiber)							Phaseolus vulgaris	Zadraznik et al.,2013
					Oxygen-evolving enhancer protein 1 precursor		gi|119952178	↓(not irrigation, 28d, GSE)↓(not irrigation, 28d, SSE)							Quercus ilex	Valero-Galvan et al.,2013
					Oxygen-evolving enhancer protein 1, chloroplast (precursor)	P14226		↑(no irrigation, 14d)							Quercus ilex	Echevarrı´a-Zomen˜o et al., 2009
					Oxygen-evolving enhancer protein 1, chloroplastic	P27665		↑(25% field capacity, 28d, Piriformospora indica-inoculated)							Hordeum vulgare L.	Ghabooli et al.,2013
					Oxygen-evolving enhancer protein 1, chloroplastic		gi|131385	↑(no irrigation, 17d, Tiber)							Phaseolus vulgaris	Zadraznik et al.,2055
					Oxygen-evolving enhancer protein 1, chloroplastic (OEE1)	P12359		↓(25% relative humidity, 48h)		↓(rewater 75% relative humidity, 24h)					Carissa spinarum	Zhang et al.,2010
					Oxygen-evolving enhancer protein 1, chloroplastic (OEE1)	P23322		↑(25% relative humidity, 48h)	↓(25% relative humidity, 120h)	↓(rewater 75% relative humidity, 24h)					Carissa spinarum	Zhang et al.,2010
					Oxygen-evolving enhancer protein 1, chloroplastic (OEE1)	P23322			↓(25% relative humidity, 120h)						Carissa spinarum	Zhang et al.,2010
					Oxygen-evolving enhancer protein 1, chloroplastic (OEE1)	12644171	GO:0006808								Quercus robur L.	Sergeant et al.,2011
					Oxygen-evolving enhancer protein 1, chloroplastic (OEE1)	12644171	GO:0006808			↑(15% soil water, 56d)					Quercus robur L.	Sergeant et al.,2011
					Oxygen-evolving enhancer protein 1, chloroplastic (OEE1)	12644171	GO:0006808								Quercus robur L.	Sergeant et al.,2011
					Oxygen-evolving enhancer protein 1, chloroplastic (OEE2)			↑(not irrigation, 10d, Midnight)↑(not irrigation, 10d, Brilliant)	↑(not irrigation, 15d, Midnight)↑(not irrigation, 15d, Brilliant)						Kentucky Bluegrass	Xu et al.,2010
					Oxygen-evolving enhancer protein 1, chloroplastic (OEE2)			↑(not irrigation, 10d, Midnight)	↑(not irrigation, 15d, Brilliant)						Kentucky Bluegrass	Xu et al.,2010
					Oxygen-evolving enhancer protein 1, chloroplastic (OEE2)			↓(not irrigation, 10d, Midnight)↑(not irrigation, 10d, Brilliant)	↑(not irrigation, 15d, Brilliant)						Kentucky Bluegrass	Xu et al.,2010
					Oxygen-evolving enhancer protein 1, chloroplastic-like		gi|356559442	↑(no irrigation, 17d, Tiber)↓(no irrigation, 17d, Starozagorski)							Phaseolus vulgaris	Zadraznik et al.,2013
					Oxygen-evolving enhancer protein 1, chloroplastic-like		gi|356559442	↑(no irrigation, 17d, Tiber)↓(no irrigation, 17d, Starozagorski)							Phaseolus vulgaris	Zadraznik et al.,2013
					Oxygen-evolving enhancer protein 2		gi|131394	↓(drought, 10d)	↓(drought, 15d)						Poa pratensis L.	Xu amd Huang, 2012
					Oxygen-evolving enhancer protein 2		gi|131394		↓(drought, 15d)						Poa pratensis L.	Xu amd Huang, 2012
					Oxygen-evolving enhancer protein 2	Q00434		↑(35% ﬁeld capacity)							Triticum aestivum L.grass (Elymus elongatum)	Gazanchian et al., 2007
					Oxygen-evolving enhancer protein 2, (OEE2), chloroplast precursor			↓(25% soil water, NT)	↑(25% soil water, SAG12-ipt)						Agrostis stolonifera	Merewitz et al., 2011
					Oxygen-evolving enhancer protein 2, chloroplast (precursor)	P16059		↓(no irrigation, 14d)							Quercus ilex	Echevarrı´a-Zomen˜o et al., 2009
					Oxygen-evolving enhancer protein 2, chloroplast precursor (23 kDa subunit of oxygen-evolving system of photosystem II)		gi|131391	↑(10% soil water content, 45d, HY)							Populus cathayana	Xiao et al.,2009
					Oxygen-evolving enhancer protein 2, chloroplast precursor (OEE2)			↑(not irrigation, 10d, Midnight)↑(not irrigation, 10d, Brilliant)	↑(not irrigation, 15d, Brilliant)						Kentucky Bluegrass	Xu et al.,2010
					Oxygen-evolving enhancer protein 2, chloroplast precursor, Putative		gi|223539254	↑(withholding water, 8d)							Populus tremulaL.×P. albaL.	Durand et al.,2011
					Oxygen-evolving enhancer protein 2, chloroplastic	131394		↑(stop watering, 7d, B)							Hordeum vulgare L.	Wendelboe-Nelson et al., 2010
					Oxygen-evolving enhancer protein 2, chloroplastic		gi|8131593	↑(no irrigation, 107d)							Cistus albidus	Brossa et al., 2015
					Oxygen-evolving enhancer protein 2, chloroplastic		gi|350538909	↑(no irrigation, 107d)							Cistus albidus	Brossa et al., 2015
					Oxygen-evolving enhancer protein 2, chloroplastic		gi|11134035	↓(no irrigation, 107d)							Cistus albidus	Brossa et al., 2015
					Oxygen-evolving enhancer protein 2, chloroplastic		gi|131390								Quercus ilex	Valero-Galvan et al.,2013
					Oxygen-evolving enhancer protein 2, chloroplastic		gi|131390	↓(not irrigation, 28d, GSE)↓(not irrigation, 28d, SSE)							Quercus ilex	Valero-Galvan et al.,2013
					Oxygen-evolving enhancer protein 2, chloroplastic		gi|266856		↓(withholding irrigation, 15d, C299)						Cynodon dactylon L. Pers. ×Cynodon transvaalensis Burtt Davy, cv. Tifway,Cynodon dactylon L.	Zhao et al., 2011
					Oxygen-evolving enhancer protein 2, chloroplastic		gi|131390	↑(no irrigation, 17d, Tiber)							Phaseolus vulgaris	Zadraznik et al.,2013
					Oxygen-evolving enhancer protein 2, chloroplastic-like		gi|356567470	↓(no irrigation, 17d, Starozagorski)							Phaseolus vulgaris	Zadraznik et al.,2013
					Oxygen-evolving enhancer protein 2, chloroplastic-like		gi|356567470	↓(no irrigation, 17d, Starozagorski)							Phaseolus vulgaris	Zadraznik et al.,2013
					Oxygen-evolving enhancer protein 2. chloroplastic (PSII)	Q00434		↑(1/3 of field capacity, 14h, Mutant)							Triticum aestivum L.	Peremarti et al.,2014
					Oxygen-evolving enhancer protein 3, chloroplastic		gi|11133850	↑(no irrigation, 107d)							Cistus albidus	Brossa et al., 2015
					Oxygen-evolving enhancer protein1	XP_002522386.1	GI:255562761	↓(10% PEG6000, 4d)	↓(drought,4d)						Glycine max L.	Mohammadi et al., 2012
					Oxygen-evolving enhancer protein2	P16059	GI:131390	↓(drought,4d)							Glycine max L.	Mohammadi et al., 2012
					Oxygen-evolving enhancer protein 1, chloroplast precursor, putative, expressed			↑(stop irrigation 35d,481-B)			Upregulated				Oryza sativa L.	Raorane et al., 2015
					photosystem II oxygen-evolving complex protein 2 (fragment)		gi|1076373	↓(not irrigation, 28d, GSE)↓(not irrigation, 28d, SSE)							Quercus ilex	Valero-Galvan et al.,2013
					QHK7H18, oxygen-evolving complex of photosystem II	CF079724			↑(50% relative humidity, 8h)	↑(50% relative humidity, 48h)	↑(rewater, 8h)				Boea hygrometrica	Jiang et al., 2007
					oxygen-evolving enhancer protein 2 (OEE2; PSBP-1)	AT1G06680		↑(no watering, 3d)	↑(no watering, 7d)	↑(no watering, 10d)	↑(no watering, 14d)				Brassica napus	Koh et al., 2015
					oxygen-evolving enhancer protein 3 (PSBQ-2)	AT4G05180		↑(no watering, 3d)	↑(no watering, 7d)	↑(no watering, 10d)	↑(no watering, 14d)				Brassica napus	Koh et al., 2015
					oxygen-evolving enhancer protein 1-2 (PSBO2)	AT3G50820			↑(no watering, 7d)	↑(no watering, 10d)	↑(no watering, 14d)				Brassica napus	Koh et al., 2015
					oxygen-evolving enhancer protein 2 (OEE2; PSBP-1)	AT1G06680					↑(no watering, 14d)				Brassica napus	Koh et al., 2015
					oxygen-evolving enhancer protein 3 (PSBQ-1)	AT4G21280				↑(no watering, 10d)	↑(no watering, 14d)				Brassica napus	Koh et al., 2015
					oxygen evolving complex 33kd family protein	AT3G50820			↑(no watering, 7d)	↓(no watering, 10d)					Brassica napus	Koh et al., 2015
					33 kda polypeptide of oxygen-evolving complex in photosystem ii (PSBO1)	AT5G66570		↑(no watering, 3d)	↑(no watering, 7d)	↑(no watering, 10d)	↑(no watering, 14d)				Brassica napus	Koh et al., 2015
					photosystem II oxygen-evolving enhancer protein 2 (PSBP-LIKE PROTEIN 1)	AT3G55330		↑(no watering, 3d)		↑(no watering, 10d)					Brassica napus	Koh et al., 2015
	Photosystem I reaction center protein	PS I core complex	2		Putative photosystem I reaction center		gi|7269762	↑(soil water potential -1.5 MPa, 4d)	↑(soil water potential -3.0 MPa, 7d)						Populus ×euramericana	He et al.,2008
					Chloroplast photosystem I protein		gi|192764655		↑(rewater, 26d)						Cistus albidus	Brossa et al., 2015
		PsaA	1		PSI polypeptide subunits		ATCG00350.1	↑(45–55% field capacity, Qinguan)	=						Malus domestica Borkh.	Zhou et al., 2015
		PsaB	2		PsaB (photosystem I core subunit)	AAL79470.1	gi|166551977	↑(12.5% soil water, 6d, 2023)↓(12.5% soil water, 6d, CE704)							Zea mays L.	Benesova et al. 2012
					PSI polypeptide subunits		ATCG00340.1	↑(45–55% field capacity, Qinguan)	↓(45–55% field capacity, Naganofuji No. 2)						Malus domestica Borkh.	Zhou et al., 2015
		PsaC	4		PS I subunit VII				↑(25% soil water, SAG12-ipt)						Agrostis stolonifera	Merewitz et al., 2011
					Photosystem I subunit VII			↓(not irrigation, 10d, Midnight)↑(not irrigation, 10d, Brilliant)							Kentucky Bluegrass	Xu et al.,2010
					Photosystem I subunit VII	TC282563			↓(drought, 14d, Excalibur)↓(drought, 14d, Kukri)	↓(drought, 24d, Excalibur)↓(drought, 24d, RAC875)	↓(rewater, 25d, Excalibur)				Triticum aestivum L.	Ford et al., 2011
					Photosystem I subunit VII				↑(25% soil water, SAG12-ipt)						Agrostis stolonifera	Merewitz et al., 2011
		PsaD	2		PSAD-2 (photosystem I subunit D-2)	TC291805		↑(drought, 5d, RAC875)	↑(drought, 14d, Kukri)		↓(rewater, 25d, Excalibur)				Triticum aestivum L.	Ford et al., 2011
					PSI polypeptide subunits		AT1G03130.1	=	↑(45–55% field capacity, Naganofuji No. 2)						Malus domestica Borkh.	Zhou et al., 2015
		PsaE	6		PSAE-2 (photosystem I subunit E-2)	TC283864			↑(drought, 14d, Kukri)		↓(rewater, 25d, Excalibur)				Triticum aestivum L.	Ford et al., 2011
					PSI reaction center subunit IV, chloroplast		gi|131176	↓(drought, 10d)							Poa pratensis L.	Xu amd Huang, 2012
					Photosystem I reaction center subunit IV. chloroplastic (PSI RCsubIV)	P13194		↓(1/3 of field capacity, 14h, Mutant)							Triticum aestivum L.	Peremarti et al.,2014
					PSI polypeptide subunits		AT2G20260.1	=	↑(45–55% field capacity, Naganofuji No. 2)						Malus domestica Borkh.	Zhou et al., 2015
					photosystem i reaction center subunit iv chloroplastic	AT4G28750			↓(no watering, 7d)						Brassica napus	Koh et al., 2015
					photosystem i reaction center subunit iv chloroplastic	AT4G28750			↓(no watering, 7d)						Brassica napus	Koh et al., 2015
		PsaF	3		PS1 reaction center subunit III	157678948	GO:0015979	↑(15% soil water, 3d)			↑(15% soil water, 65d)				Quercus robur L.	Sergeant et al.,2011
					PSAF (photosystem I subunit F)	TC277864				↓(drought, 24d, Kukri)	↑(rewater, 25d, Excalibur)				Triticum aestivum L.	Ford et al., 2011
					Photosystem 1 subunit PsaD	ABQ63097.1		↓(drought,4d)							Glycine max L.	Mohammadi et al., 2012
		PsaK	3		PsaK (photosystem I reaction center subunit)	ACG29417.1	gi|149205590	↓(12.5% soil water, 6d, 2023)↑(12.5% soil water, 6d, CE704)							Zea mays L.	Benesova et al. 2012
					PSAK (PS I subunit K)			↑(not irrigation, 10d, Brilliant)	↓(not irrigation, 15d, Midnight)↑(not irrigation, 15d, Brilliant)						Kentucky Bluegrass	Xu et al.,2010
					PSAK (PS I Subunit K)										Agrostis stolonifera	Merewitz et al., 2011
		PsaN	4		PSI subunit N, chloroplast precursor (PSI-N)										Agrostis stolonifera	Merewitz et al., 2011
					PSI polypeptide subunits		AT5G64040.1	=	↑(45–55% field capacity, Naganofuji No. 2)						Malus domestica Borkh.	Zhou et al., 2015
					PSI polypeptide subunits		AT5G64040.1	=	↑(45–55% field capacity, Naganofuji No. 2)						Malus domestica Borkh.	Zhou et al., 2015
					photosystem i reaction center subunit n	AT5G64040				↑(no watering, 10d)					Brassica napus	Koh et al., 2015
		Fx	3		Photosystem I iron–sulfur center	Q32RM0		↑(25% field capacity, 28d, Piriformospora indica-inoculated)							Hordeum vulgare L.	Ghabooli et al.,2013
					Photosystem I iron–sulfur center	A1YV25		↓(25% field capacity, 28d, non-inoculated)							Hordeum vulgare L.	Ghabooli et al.,2013
					2Fe–2S iron–sulfur cluster-binding domain containing protein, expressed			↑(stop irrigation 35d,481-B)			Upregulated				Oryza sativa L.	Raorane et al., 2015
		P700	1		Photosystem I P700 chlorophyll a apoprotein A2	TC287201				↓(drought, 24d, Kukri)↓(drought, 24d, RAC875)	↓(rewater, 25d, Kukri)				Triticum aestivum L.	Ford et al., 2011
		PsaH	2		Photosystem I subunit H2		AT1G52230.1	↑(45–55% field capacity, Qinguan)	=						Malus domestica Borkh.	Zhou et al., 2015
					photosystem i reaction center subunit h-2	AT1G52230				↓(no watering, 10d)					Brassica napus	Koh et al., 2015
		PsaG	2		PSI polypeptide subunits		AT1G55670.1	↑(45–55% field capacity, Qinguan)	=						Malus domestica Borkh.	Zhou et al., 2015
					photosystem i reaction center subunit ii precursor	AT4G02770		↑(no watering, 3d)		↑(no watering, 10d)	↑(no watering, 14d)				Brassica napus	Koh et al., 2015
		PSI-P	1		protein curvature thylakoid chloroplastic（ PSI-P (AT2G46820) photosystem I P subunit）	AT2G46820		↑(no watering, 3d)	↓(no watering, 7d)	↑(no watering, 10d)	↑(no watering, 14d)				Brassica napus	Koh et al., 2015
	Photosystem II reaction center protein	CP47	2		Photosystem II CP47 chlorophyll apoprotein	TC364976			↓(drought, 14d, RAC875)	↓(drought, 24d, Excalibur)↓(drought, 24d, Kukri)↓(drought, 24d, RAC875)					Triticum aestivum L.	Ford et al., 2011
					PsbB (CP47, photosystem II core anntena)	BAL44657.1	gi|113826696	↑(12.5% soil water, 6d, 2023)↓(12.5% soil water, 6d, CE704)							Zea mays L.	Benesova et al. 2012
		PsbO	2		PsbO-2 (photosystem II subunit O-2)	TC287564		↑(drought, 5d, RAC875)	↓(drought, 14d, RAC875)		↓(rewater, 25d, Excalibur)↓(rewater, 25d, Kukri)↓(rewater, 25d, RAC875)				Triticum aestivum L.	Ford et al., 2011
					PSII polypeptide subunits		AT3G50820.1	=	↑(45–55% field capacity, Naganofuji No. 2)						Malus domestica Borkh.	Zhou et al., 2015
		PsbP	9		PsbP (23 kDa extrinsic polypeptide of photosystem II)	ABY52939.1	gi|149005501	↓(12.5% soil water, 6d, 2023)↓(12.5% soil water, 6d, CE704)							Zea mays L.	Benesova et al. 2012
					PsbP-1 (photosystem II subunit P-1)	TC277987		↑(drought, 5d, RAC875)			↓(rewater, 25d, Excalibur)↓(rewater, 25d, RAC875)				Triticum aestivum L.	Ford et al., 2011
					PPL1 (PsbP-like protein 1)	TC355464		↑(drought, 5d, RAC875)	↑(drought, 14d, Kukri)	↑(drought, 24d, Excalibur)					Triticum aestivum L.	Ford et al., 2011
					PsbP, putative, expressed			↓(stop irrigation 35d,481-B)			Downregulated				Oryza sativa L.	Raorane et al., 2015
					PsbP-related thylakoid lumenal protein 4, chloroplast precursor, putative, expressed			↓(stop irrigation 35d,481-B)			Downregulated				Oryza sativa L.	Raorane et al., 2015
					PSII polypeptide subunits		AT1G06680.1	=	↑(45–55% field capacity, Naganofuji No. 2)						Malus domestica Borkh.	Zhou et al., 2015
					PsbP domain-containing protein 3, chloroplastic	AT1G76450					↑(no watering, 14d)				Brassica napus	Koh et al., 2015
					psbp domain-containing protein chloroplastic	AT3G56650			↓(no watering, 7d)	↑(no watering, 10d)					Brassica napus	Koh et al., 2015
					photosystem II reaction center family protein (PSBP-DOMAIN PROTEIN1; PPD1)	AT4G15510			↑(no watering, 7d)	↓(no watering, 10d)	↑(no watering, 14d)				Brassica napus	Koh et al., 2015
		PsbQ	2		PsbQ (16 kDa extrinsic polypeptide of photosystem II)	ACG26647.1	gi|149090677	↓(12.5% soil water, 6d, 2023)↑(12.5% soil water, 6d, CE704)							Zea mays L.	Benesova et al. 2012
					PsbQ1 (oxygen-evolving enhancer protein 3)	TC280313		↑(drought, 5d, RAC875)	↑(drought, 14d, Kukri)	↑(drought, 24d, Excalibur)	↓(rewater, 25d, Excalibur)↓(rewater, 25d, RAC875)				Triticum aestivum L.	Ford et al., 2011
		PsbS	1		PsbS (photosystem II subunit S)	TC280250			↓(drought, 14d, Kukri)		↑(rewater, 25d, Excalibur)				Triticum aestivum L.	Ford et al., 2011
		RFeS	4		Rieske fes protein	TC315938									Triticum aestivum L.	Ford et al., 2011
					Rieske iron-sulfur protein, chloroplast precursor			↑(not irrigation, 10d, Midnight)↑(not irrigation, 10d, Brilliant)	↑(not irrigation, 15d, Brilliant)						Kentucky Bluegrass	Xu et al.,2010
					Rieske Fe-S precursor protein	AF093631		↓(withhold water 38d, CT9993,TR62266)	↓(withhold water 43d, TR62266)						Oryza sativa L.	Salekdeh et al., 2002
					Rieske Fe-S precursor protein	AF093631			↓(withhold water 43d, TR62266)						Oryza sativa L.	Salekdeh et al., 2002
		HCF136	3		Photosystem II stability/assembly factor HCF136	TC310200		↓(drought, 5d, RAC875)	↓(drought, 14d, Kukri)		↑(rewater, 25d, Excalibur)				Triticum aestivum L.	Ford et al., 2011
					Photosystem II stability/assembly factor	75252730		↑(30% relative water content)							Sporobolus stapﬁanus	Oliver et al.,2011
					photosystem ii stability assembly factor chloroplastic	AT5G23120			↑(no watering, 7d)	↑(no watering, 10d)	↑(no watering, 14d)				Brassica napus	Koh et al., 2015
		PsbR	3		Photosystem II subunit R	AT1G79040.1		↑(45–55% field capacity, Qinguan)	=						Malus domestica Borkh.	Zhou et al., 2015
					PSII polypeptide subunits	AT1G03600.1		=	↑(45–55% field capacity, Naganofuji No. 2)						Malus domestica Borkh.	Zhou et al., 2015
					Photosystem II 10 kDa polypeptide, chloroplastic (PSBR)	AT1G79040				↑(no watering, 10d)					Brassica napus	Koh et al., 2015
		PsbH	1		Photosystem II reaction center protein H (PSBH)	ATCG00710			↓(no watering, 7d)		↓(no watering, 14d)				Brassica napus	Koh et al., 2015
	Thylakoid lumen protein	TLP	13		Thylakoid luminal 16.5 kDa protein	ACG28369.1	gi|149083201	↓(12.5% soil water, 6d, 2023)↑(12.5% soil water, 6d, CE704)							Zea mays L.	Benesova et al. 2012
					thylakoid lumenal 15 kDa protein, chloroplast	TC321469		↑(drought, 5d, RAC875)	↑(drought, 14d, Kukri)	↑(drought, 24d, Excalibur)↑(drought, 24d, Kukri)↑(drought, 24d, RAC875)					Triticum aestivum L.	Ford et al., 2011
					thylakoid lumenal protein-related	TC302736		↑(drought, 5d, RAC875)							Triticum aestivum L.	Ford et al., 2011
					Chloroplast thylakoid lumen protein	TC288064					↓(rewater, 25d, Excalibur)				Triticum aestivum L.	Ford et al., 2011
					thylakoid lumen 18.3 kDa protein	AT1G54780		↑(no watering, 3d)	↑(no watering, 7d)	↑(no watering, 10d)	↑(no watering, 14d)				Brassica napus	Koh et al., 2015
					thylakoid lumenal 15 kda protein chloroplastic-like	AT2G44920		↑(no watering, 3d)	↑(no watering, 7d)	↓(no watering, 10d)					Brassica napus	Koh et al., 2015
					thylakoid lumenal 19 kda chloroplastic	AT3G63540			↑(no watering, 7d)	↑(no watering, 10d)					Brassica napus	Koh et al., 2015
					thylakoid lumenal 29 kda chloroplastic	AT4G09010			↑(no watering, 7d)	↑(no watering, 10d)	↑(no watering, 14d)				Brassica napus	Koh et al., 2015
					thylakoid lumenal protein-17.4KD	AT5G53490					↑(no watering, 14d)				Brassica napus	Koh et al., 2015
					thylakoid lumenal protein chloroplastic	AT1G12250		↓(no watering, 3d)	↑(no watering, 7d)	↑(no watering, 10d)	↑(no watering, 14d)				Brassica napus	Koh et al., 2015
					chloroplast thylakoid lumen protein	AT4G02530					↑(no watering, 14d)				Brassica napus	Koh et al., 2015
					thylakoid lumenal kda protein chloroplastic	AT5G52970		↑(no watering, 3d)	↑(no watering, 7d)	↑(no watering, 10d)	↑(no watering, 14d)				Brassica napus	Koh et al., 2015
					luminal binding protein （BIP）	AT5G42020			↑(no watering, 7d)	↑(no watering, 10d)					Brassica napus	Koh et al., 2015
	Chloroplast chaperonin 21	Cpn21	2		Chloroplast chaperonin 21	AAT80888		↑(25% relative humidity, 48h)	↑(25% relative humidity, 120h)	↑(rewater 75% relative humidity, 24h)					Carissa spinarum	Zhang et al.,2010
	Thylakoid rhodanese-like protein				Thylakoid rhodanese-like protein	AT4G01050		↑(no watering, 3d)	↑(no watering, 7d)	↑(no watering, 10d)					Brassica napus	Koh et al., 2015
	Protochlorophyllide reductase	PORA	3		PORA; oxidoreductase/ protochlorophyllide reductase	TC283747		↓(drought, 5d, Excalibur)							Triticum aestivum L.	Ford et al., 2011
					Protochlorophyllide reductase B	gb|EU963129.1|	gi|149110670	↓(12.5% soil water, 6d, 2023)↓(12.5% soil water, 6d, CE704)							Zea mays L.	Benesova et al. 2012
					Protochlorophyllide reductase C, chloroplastic	AT1G03630		↑(no watering, 3d)	↓(no watering, 7d)	↓(no watering, 10d)	↑(no watering, 14d)				Brassica napus	Koh et al., 2015
	10.3 Photorespiration (67)
	Glutamate:glyxoylate aminotransferase	GGAT	2		Glutamate:glyxoylate aminotransferase	TC313181		↓(drought, 5d, RAC875)	↓(drought, 14d, Kukri)	↓(drought, 24d, Excalibur)	↑(rewater, 25d, Excalibur)				Triticum aestivum L.	Ford et al., 2011
					Glutamate:glyoxylate aminotransferase 2	AT1G23310					↑(no watering, 14d)				Brassica napus	Koh et al., 2015
	Glycolate oxidase	GO	11		Glycolate oxidase	TC279111			↓(drought, 14d, Kukri)	↓(drought, 24d, Excalibur)↓(drought, 24d, Kukri)↓(drought, 24d, RAC875)					Triticum aestivum L.	Ford et al., 2011
					Glycolate oxidase				↓(25% soil water, SAG12-ipt)						Agrostis stolonifera	Merewitz et al., 2011
					Peroxisomal (S)-2-hydroxy-acid oxidase	P05414		↓(dry season, 6 month)							Eucalyptus	Bedon et al., 2012
					Peroxisomal (S)-2-hydroxy-acid oxidase	P05414		↓(dry season, 6 month)							Eucalyptus	Bedon et al., 2012
					Peroxisomal (S)-2-hydroxy-acid oxidase	P05414		↓(dry season, 6 month)							Eucalyptus	Bedon et al., 2012
					hydroxyacid oxidase 1, putative, expressed			↓(stop irrigation 35d,481-B)							Oryza sativa L.	Raorane et al., 2015
					Glycolate oxidase	AT3G14420.2		↑(45–55% field capacity, Qinguan,tolerant)	↓(45–55% field capacity, Naganofuji No. 2)						Malus domestica Borkh.	Zhou et al., 2015
					Glycolate oxidase	AT3G14420.2		=	↓(45–55% field capacity, Naganofuji No. 2)						Malus domestica Borkh.	Zhou et al., 2015
					Hydroxyacid oxidase 1, putative, expressed			↑(stop irrigation 35d,481-B)							Oryza sativa L.	Raorane et al., 2015
					Peroxisomal -2-hydroxy-acid oxidase glo1	AT3G14420				↑(no watering, 10d)					Brassica napus	Koh et al., 2015
					Glycolate oxidase		gi|1773330			↑(rewater,7d)					Populus tremulaL.×P. albaL.	Durand et al.,2011
	Hydroxypyruvate reductase	HPR	7		Hydroxypyruvate reductase	TC300037			↓(drought, 14d, Kukri)	↓(drought, 24d, Excalibur)	↑(rewater, 25d, Excalibur)				Triticum aestivum L.	Ford et al., 2011
					Peroxisomal hydroxypyruvate reductase	BAG09374.1		↓(10% PEG6000, 4d)	↓(drought,4d)						Glycine max L.	Mohammadi et al., 2012
					Hydroxypyruvate reductase	AT1G68010.1		=	↓(45–55% field capacity, Naganofuji No. 2)						Malus domestica Borkh.	Zhou et al., 2015
					Hydroxypyruvate reductase	AT1G68010.1		=	↓(45–55% field capacity, Naganofuji No. 2)						Malus domestica Borkh.	Zhou et al., 2015
					Hydroxypyruvate reductase				↑(25% soil water, SAG12-ipt)						Agrostis stolonifera	Merewitz et al., 2011
					Hydroxypyruvate reductase		gi|223528624	↓(withholding water, 8d)							Populus tremulaL.×P. albaL.	Durand et al.,2011
					Hydroxypyruvate reductase		gi|223528624			↓(rewater,7d)					Populus tremulaL.×P. albaL.	Durand et al.,2011
	Serine glyoxylate aminotransferase	SGAT	2		Serine glyoxylate aminotransferase	Q56YA5		↓(dry season, 6 month)							Eucalyptus	Bedon et al., 2012
					Serine glyoxylate aminotransferase	O81248		↓(dry season, 6 month)							Eucalyptus	Bedon et al., 2012
	Serine transhydroxymethyltransferase	SHMT	9		Serine transhydroxymethyltransferase 1	TC297018									Triticum aestivum L.	Ford et al., 2011
					Serine transhydroxymethyltransferase 1	TC356717		↓(drought, 5d, RAC875)							Triticum aestivum L.	Ford et al., 2011
					Glycine hydroxymethyltransferase			↓(not irrigation, 10d, Midnight)↓(not irrigation, 10d, Brilliant)	↓(not irrigation, 15d, Midnight)↓(not irrigation, 15d, Brilliant)						Kentucky Bluegrass	Xu et al.,2010
					Glycine hydroxymethyltransferase			↓(not irrigation, 10d, Midnight)↓(not irrigation, 10d, Brilliant)	↓(not irrigation, 15d, Midnight)↓(not irrigation, 15d, Brilliant)						Kentucky Bluegrass	Xu et al.,2010
					Serine hydroxymethyltransferase	AT4G32520.2		↑(45–55% field capacity, Qinguan)	=						Malus domestica Borkh.	Zhou et al., 2015
					Serine hydroxymethyltransferase, mitochondrial precursor, putative, expressed			↑(stop irrigation 35d,481-B)							Oryza sativa L.	Raorane et al., 2015
					serine hydroxymethyltransferase mitochondrial	AT4G37930		↑(no watering, 3d)		↑(no watering, 10d)	↑(no watering, 14d)				Brassica napus	Koh et al., 2015
					serine hydroxymethyltransferase 2	AT5G26780			↑(no watering, 7d)	↓(no watering, 10d)	↑(no watering, 14d)				Brassica napus	Koh et al., 2015
					Putative glycine hydroxymethyltransferase	AAR07090		↑（no irrigation, 20 d）							Oryza sativa L.	Ji et al., 2012
	Glycine decarboxylase	GDC	5		Glycine decarboxylase P subunit	TC283187		↓(drought, 5d, RAC875)	↓(drought, 14d, Kukri)↑(drought, 14d, RAC875)		↑(rewater, 25d, Excalibur)				Triticum aestivum L.	Ford et al., 2011
					Glycine decarboxylase P subunit		gi|2565305	↓(25% soil water, NT)							Agrostis stolonifera	Merewitz et al., 2011
					H protein subunit of glycine decarboxylase 3′-partial		gi|10257441	↓(50 % water lost daily, 20 d)							Upland Oryza sativa L.	Rabello et al.,2014
					Glycine decarboxylase P subunit/Victorin binding protein			↑(25% soil water, NT)							Agrostis stolonifera	Merewitz et al., 2011
					Precursor of carboxylase p-prot 1 (P-protein subunit of glycine decarboxylase enzyme complex)	224088838	GO:0006519				↑(15% soil water, 65d)				Quercus robur L.	Sergeant et al.,2011
	Glycine cleavage system	GCS	7		Glycine cleavage. H protein	AT1G32470.1		↓(45–55% field capacity, Qinguan)	=						Malus domestica Borkh.	Zhou et al., 2015
					Glycine cleavage. T subunit	AT1G11860.3		=	↓(45–55% field capacity, Naganofuji No. 2)						Malus domestica Borkh.	Zhou et al., 2015
					Glycine cleavage. P subunit	AT4G33010.1		↑(45–55% field capacity, Qinguan)	↓(45–55% field capacity, Naganofuji No. 2)						Malus domestica Borkh.	Zhou et al., 2015
					Glycine cleavage. P subunit	AT4G33010.1		=	↓(45–55% field capacity, Naganofuji No. 2)						Malus domestica Borkh.	Zhou et al., 2015
					Glycine cleavage system H protein, putative, expressed			↑(stop irrigation 35d,481-B)							Oryza sativa L.	Raorane et al., 2015
					Glycine cleavage system T protein	TC298963									Triticum aestivum L.	Ford et al., 2011
					Glycine cleavage system h protein mitochondrial	AT1G32470			↓(no watering, 7d)						Brassica napus	Koh et al., 2015
	Aminomethyl transferase	AMT	14		Aminomethyl transferase	NP_001053928	gi|115460656		↓(drought, 15d)						Poa pratensis L.	Xu amd Huang, 2012
					Aminomethyl transferase	NP_001053928	gi|115460656		↓(drought, 15d)						Poa pratensis L.	Xu amd Huang, 2012
					Aminomethyltransferase			↓(not irrigation, 10d, Midnight)	↑(not irrigation, 15d, Brilliant)						Kentucky Bluegrass	Xu et al.,2010
					Aminomethyltransferase			↓(not irrigation, 10d, Midnight)↓(not irrigation, 10d, Brilliant)							Kentucky Bluegrass	Xu et al.,2010
					Aminomethyltransferase			↓(not irrigation, 10d, Brilliant)							Kentucky Bluegrass	Xu et al.,2010
					Aminomethyltransferase (mitochondrial)	XP_003580582.1	gi|149086494	↓(12.5% soil water, 6d, 2023)↓(12.5% soil water, 6d, CE704)							Zea mays L.	Benesova et al. 2012
					Aminomethyltransferase			↑(25% soil water, NT)							Agrostis stolonifera	Merewitz et al., 2011
					Aminomethyltransferase, mitochondrial precursor		gi|3334196	↑(withholding irrigation, 15d, Tifway)							Cynodon dactylon L. Pers. ×Cynodon transvaalensis Burtt Davy, cv. Tifway,Cynodon dactylon L.	Zhao et al., 2011
					Aminomethyltransferase		gi|113565499		↓(withholding irrigation, 15d, C299,sensitive)						Cynodon dactylon L. Pers. ×Cynodon transvaalensis Burtt Davy, cv. Tifway,Cynodon dactylon L.	Zhao et al., 2011
					aminomethyltransferase	AT1G11860			↑(no watering, 7d)	↑(no watering, 10d)					Brassica napus	Koh et al., 2015
					Aminotransferases	AT1G70580.4		↑(45–55% field capacity, Qinguan, tolerant	↓(45–55% field capacity, Naganofuji No. 2)						Malus domestica Borkh.	Zhou et al., 2015
					Aminotransferases	AT2G13360.2		↑(45–55% field capacity, Qinguan)	↓(45–55% field capacity, Naganofuji No. 2)						Malus domestica Borkh.	Zhou et al., 2015
					Aminotransferases	AT2G13360.2		↑(45–55% field capacity, Qinguan)	=						Malus domestica Borkh.	Zhou et al., 2015
					Aminotransferase, putative, expressed			↑(stop irrigation 35d,481-B)							Oryza sativa L.	Raorane et al., 2015
	Glycine dehydrogenase	GLDC	6		Glycine dehydrogenase	O49954		↓(25% field capacity, 18d)							Populus deltoides×Populus nigra	Bonhomme et al.,2009
					Glycine dehydrogenase [decarboxylating] 1		gi|15225249		↑(rewater, 26d)						Cistus albidus	Brossa et al., 2015
					Glycine dehydrogenase P protein		gi|115439533		↓(withholding irrigation, 15d, C299)						Cynodon dactylon L. Pers. ×Cynodon transvaalensis Burtt Davy, cv. Tifway,Cynodon dactylon L.	Zhao et al., 2011
					Glycine dehydrogenase, putative, expressed			↑(stop irrigation 35d,481-B)							Oryza sativa L.	Raorane et al., 2015
					Putative glycine dehydrogenase	BAD35509		↓（no irrigation, 20 d）							Oryza sativa L.	Ji et al., 2012
					Putative glycine dehydrogenase	BAD35509		↓（no irrigation, 20 d）							Oryza sativa L.	Ji et al., 2012
	Alanine:glyxoylate aminotransferase	AGXT	3		Alanine:glyxoylate aminotransferase(AGXT)	TC324005				↓(drought, 24d, Excalibur)↓(drought, 24d, RAC875)	↑(rewater, 25d, Excalibur)				Triticum aestivum L.	Ford et al., 2011
					Alanine glyoxylate aminotransferase		gi|156712214		↑(10 % ﬁeld capacity, 5d, # 15163)						Hordeum vulgare L.	Ashoub et al., 2013
					Alanine glyoxylate aminotransferase		gi|156712214	↑(10 % ﬁeld capacity, 5d, # 15141)	↑(10 % ﬁeld capacity, 5d, # 15163)						Hordeum vulgare L.	Ashoub et al., 2013
	D-glycerate 3-kinase, chloroplastic	GK	1		D-glycerate 3-kinase, chloroplastic	AT1G80380		↑(no watering, 3d)	↓(no watering, 7d)	↑(no watering, 10d)	↑(no watering, 14d)				Brassica napus	Koh et al., 2015
	11 Carbohydrate and energy metabolism (436)
	11.1 ATP synthesis and electrical transport chain（110）
	ATP/ADP translocase	AAC	2		ATP/ADP translocase (mitochondrial) 即ATP carrier protein	emb|X57556.1|ZMANT1MU	gi|149111265	↓(12.5% soil water, 6d, 2023)↑(12.5% soil water, 6d, CE704)							Zea mays L.	Benesova et al. 2012
					ATP/ADP translocase (plastidic)	BAD24996.1	gi|148990897	↓(12.5% soil water, 6d, 2023)↑(12.5% soil water, 6d, CE704)							Zea mays L.	Benesova et al. 2012
	ATP synthase	ATPase	91		Putative ATP synthase	41052565		↑(30% relative humidity, 48h)	↑(30% relative humidity, 72h)	↑(30% relative humidity, 96h)	↑(30% relative humidity, 120h)	↑(30% relative humidity, 144h)	↑(30% relative humidity, 168h)	↑(30% relative humidity, 192h)	Oryza sativa L.	Pandey et al.,2010
					ATP synthase		gi|46390205		↓(withholding irrigation, 15d, C299)						Cynodon dactylon L. Pers. ×Cynodon transvaalensis Burtt Davy, cv. Tifway,Cynodon dactylon L.	Zhao et al., 2011
					ATP synthase			↓(25% soil water, NT)							Agrostis stolonifera	Merewitz et al., 2011
		AAA-type ATPase			AAA-type ATPase family protein, putative, expressed			↓(stop irrigation 35d,481-B)							Oryza sativa L.	Raorane et al., 2015
					H+-transporting ATP synthase beta chain (mitochondrial)	TC312825		↓(drought, 5d, RAC875)	↓(drought, 14d, Kukri)	↓(drought, 24d, Excalibur)	↑(rewater, 25d, Excalibur)↓(rewater, 25d, RAC875)				Triticum aestivum L.	Ford et al., 2011
		α			ATP synthase alpha chain		gi|98978859		↓(withholding irrigation, 15d, C299)						Cynodon dactylon L. Pers. ×Cynodon transvaalensis Burtt Davy, cv. Tifway,Cynodon dactylon L.	Zhao et al., 2011
					ATP synthase CF1 alpha subunit	YP_538770.1	GI:91214148	↓(10% PEG6000, 4d)	↓(drought,4d)						Glycine max L.	Mohammadi et al., 2012
					ATP synthase CF1 alpha subunit	YP_538770.1	GI:91214148	↑(10% PEG6000, 4d)	↑(drought,4d)						Glycine max L.	Mohammadi et al., 2012
					ATP synthase CF1 alpha subunit		gi|118430385	↓(withhold water to −2.5 Mpa soil water potential, 3 week)							Hordeum spontaneum	Ashoub et al., 2015
					ATP synthase CF1 alpha chain	TC277171		↑(drought, 5d, Excalibur)	↓(drought, 14d, Kukri)	↓(drought, 24d, Excalibur)↓(drought, 24d, Kukri)↓(drought, 24d, RAC875)	↑(rewater, 25d, Excalibur)↓(rewater, 25d, Kukri)				Triticum aestivum L.	Ford et al., 2011
					ATP synthase CF1 alpha subunit		gi|91208887	↓(no irrigation, 107d)							Cistus albidus	Brossa et al., 2015
					ATP synthase CF1 alpha subunit		gi|91208887	↓(no irrigation, 107d)							Cistus albidus	Brossa et al., 2015
					ATP synthase CF1 alpha subunit	11466784		↑(30% relative water content)							Sporobolus stapﬁanus	Oliver et al.,2011
					ATP synthase CF1 alpha subunit	11466784		↑(30% relative water content)							Sporobolus stapﬁanus	Oliver et al.,2011
					ATP synthase CF1 alpha subunit	11466784		↑(30% relative water content)							Sporobolus stapﬁanus	Oliver et al.,2011
					ATP synthase CF1 alpha subunit	11466784		↑(30% relative water content)							Sporobolus stapﬁanus	Oliver et al.,2011
					ATP synthase CF1 alpha subunit	11466784		↑(30% relative water content)							Sporobolus stapﬁanus	Oliver et al.,2011
					ATP synthase CF1 alpha subunit	11466784		↑(30% relative water content)							Sporobolus stapﬁanus	Oliver et al.,2011
					ATP synthase CF1 alpha subunit	11466784		↑(30% relative water content)							Sporobolus stapﬁanus	Oliver et al.,2011
					ATP synthase CF1 alpha subunit		gi|139387459	↓(no irrigation, 17d, Tiber)↓(no irrigation, 17d, Starozagorski)							Phaseolus vulgaris	Zadraznik et al.,2013
					ATP synthase CF1 alpha subunit		gi|139387459	↓(no irrigation, 17d, Tiber)↓(no irrigation, 17d, Starozagorski)							Phaseolus vulgaris	Zadraznik et al.,2013
					ATP synthase CF1 alpha subunit		gi|139387459	↓(no irrigation, 17d, Tiber)							Phaseolus vulgaris	Zadraznik et al.,2013
					ATP synthase CF1 alpha subunit			↑(35% RWC)							Gossypium herbaceum L.	Deeba et al., 2012
					ATP synthase subunit alpha		gi|166165274	↑(10 % ﬁeld capacity, 5d, # 15141)	↑(10 % ﬁeld capacity, 5d, # 15163)						Hordeum vulgare L.	Ashoub et al., 2013
					ATP synthase subunit alpha cp	Q49L13		↓(dry season, 6 month)							Eucalyptus	Bedon et al., 2012
					ATP synthase subunit alpha cp	Q49L13		↓(dry season, 6 month)							Eucalyptus	Bedon et al., 2012
					ATP synthase subunit alpha, chloroplastic		gi|148886606		↓(withholding irrigation, 15d, C299)						Cynodon dactylon L. Pers. ×Cynodon transvaalensis Burtt Davy, cv. Tifway,Cynodon dactylon L.	Zhao et al., 2011
					ATP synthase subunit alpha, mitochondrial		gi|81176509	↓(25% soil water, NT)	↑(25% soil water, SAG12-ipt)						Agrostis stolonifera	Merewitz et al., 2011
					ATPase subunit alpha		gi|323149044	↑(no irrigation, 17d, Starozagorski)							Phaseolus vulgaris	Zadraznik et al.,2013
					ATP synthase cf1 alpha subunit	ATCG00120			↑(no watering, 7d)	↑(no watering, 10d)					Brassica napus	Koh et al., 2015
					ATP synthase cf1 alpha subunit	ATCG00120				↑(no watering, 10d)	↑(no watering, 14d)				Brassica napus	Koh et al., 2015
					ATP synthase subunit alpha	Q6L3A1		↑（withholding water, 9 d）							Zea mays	Sanggon et al., 2015
		β			ATP synthase beta subunit		gi|110227086	↓(35% soil water, 7d)		↑(35% soil water, 21d)					Populus tremula L. × P. alba L.-clone INRA 717–1-B4	Bohler,et al., 2013
					ATP synthase beta subunit		gi|4063550		↑(rewater, 26d)						Cistus albidus	Brossa et al., 2015
					ATP synthase beta subunit		gi|110915610	↓(withhold water to −2.5 Mpa soil water potential, 3 week)							Hordeum spontaneum	Ashoub et al., 2015
					ATP synthase beta subunit		gi|110915610	↓(withhold water to −2.5 Mpa soil water potential, 3 week)							Hordeum spontaneum	Ashoub et al., 2015
					ATP synthase beta subunit		gi|21633365	↑(10% soil water content, 45d, HY)							Populus cathayana	Xiao et al.,2009
					ATP synthase beta subunit	6815115		↑(30% relative water content)							Sporobolus stapﬁanus	Oliver et al.,2011
					ATP synthase beta subunit	6815115		↑(30% relative water content)							Sporobolus stapﬁanus	Oliver et al.,2011
					ATP synthase beta subunit	6815115		↑(30% relative water content)							Sporobolus stapﬁanus	Oliver et al.,2011
					ATP synthase beta subunit	6815115		↑(30% relative water content)							Sporobolus stapﬁanus	Oliver et al.,2011
					ATP synthase beta subunit		gi|110227086			↑(35% soil water, 21d)					Populus tremula L. × P. alba L.-clone INRA 717–1-B4	Bohler,et al., 2013
					ATP synthase CF1 beta subunit	118430395		↑(stop watering, 7d, GP)↑(stop watering, 7d, B)							Hordeum vulgare L.	Wendelboe-Nelson et al., 2010
					ATP synthase CF1 beta subunit	CB412223		↓(drought, 5d, RAC875)	↓(drought, 14d, Kukri)	↓(drought, 24d, Excalibur)↓(drought, 24d, Kukri)↓(drought, 24d, RAC875)	↑(rewater, 25d, Excalibur)↓(rewater, 25d, Kukri)↓(rewater, 25d, RAC875)				Triticum aestivum L.	Ford et al., 2011
					ATP synthase CF1 beta subunit	TC277172			↓(drought, 14d, Kukri)	↓(drought, 24d, Excalibur)↓(drought, 24d, Kukri)↓(drought, 24d, RAC875)	↓(rewater, 25d, RAC875)				Triticum aestivum L.	Ford et al., 2011
					ATP synthase subunit β										Agrostis stolonifera	Merewitz et al., 2011
					ATP synthase β subunit, chloroplast		gi|14718199	↓(not irrigation, 28d, GSE)↓(not irrigation, 28d, SSE)							Quercus ilex	Valero-Galvan et al.,2013
					ATP synthase β subunit, chloroplast		gi|14718199	↓(not irrigation, 28d, GSE)↓(not irrigation, 28d, SSE)							Quercus ilex	Valero-Galvan et al.,2013
					ATP synthase β subunit, mitochondrial		gi|114421								Quercus ilex	Valero-Galvan et al.,2013
					β subunit of ATP synthase		gi|20269410	↓(no irrigation,7d)							Medicago sativa L.	Aranjuelo et al., 2011
					β subunit of mitochondrial ATP synthase		gi|159466892	↓(no irrigation,7d)							Medicago sativa L.	Aranjuelo et al., 2011
					ATPase, β subunit			↓(25% soil water, NT)							Agrostis stolonifera	Merewitz et al., 2011
					ATPase, β subunit										Agrostis stolonifera	Merewitz et al., 2011
					ATPase, beta subunit			↓(not irrigation, 10d, Brilliant)							Kentucky Bluegrass	Xu et al.,2010
					ATPase, beta subunit			↓(not irrigation, 10d, Brilliant)	↓(not irrigation, 15d, Brilliant)						Kentucky Bluegrass	Xu et al.,2010
					Putative ATP synthase subunit beta				↓(rewater, 28d)						Populus deltoides×Populus nigra	Bonhomme et al.,2009
					ATP synthase beta subunit	ATCG00480.1		↑(45–55% field capacity, Qinguan,tolerant)	↓(45–55% field capacity, Naganofuji No. 2)						Malus domestica Borkh.	Zhou et al., 2015
					ATP synthase beta subunit	ATCG00480.1		↑(45–55% field capacity, Qinguan)	↓(45–55% field capacity, Naganofuji No. 2)						Malus domestica Borkh.	Zhou et al., 2015
					ATP synthase cf1 beta subunit	ATCG00480			↑(no watering, 7d)	↑(no watering, 10d)	↑(no watering, 14d)				Brassica napus	Koh et al., 2015
					ATP synthase subunit beta- mitochondrial-like	AT5G08680			↑(no watering, 7d)	↑(no watering, 10d)	↑(no watering, 14d)				Brassica napus	Koh et al., 2015
					ATPase beta subunit	ATCG00480			↑(no watering, 7d)	↑(no watering, 10d)	↑(no watering, 14d)				Brassica napus	Koh et al., 2015
					ATPase beta subunit — chloroplast		gi|110227086	↑(withholding water, 8d)							Populus tremulaL.×P. albaL.	Durand et al.,2011
					ATPase beta subunit — chloroplast		gi|110227086	↑(withholding water, 8d)							Populus tremulaL.×P. albaL.	Durand et al.,2011
					ATP synthase CF1 beta subunit	NP 039390		↓（no irrigation, 20 d）							Oryza sativa L.	Ji et al., 2012
					Mitochondrial F1-ATPase beta subunit	BAA01372		↓（no irrigation, 20 d）							Oryza sativa L.	Ji et al., 2012
					Putative ATP synthase beta subunit	BAD82522		↑（no irrigation, 20 d）							Oryza sativa L.	Ji et al., 2012
		γ			ATP synthase gamma chain, chloroplast	5708095	GO:0015986		↓(15% soil water, 8d)						Quercus robur L.	Sergeant et al.,2011
					ATP synthase γ chain, chloroplast precursor		gi|5708095								Quercus ilex	Valero-Galvan et al.,2013
					ATP synthase gamma chain chloroplastic	AT4G04640		↑(no watering, 3d)	↑(no watering, 7d)	↑(no watering, 10d)	↑(no watering, 14d)				Brassica napus	Koh et al., 2015
					ATP synthase subunit gamma, chloroplastic precursor	B6TUD4		↑（withholding water, 9 d）							Zea mays	Sanggon et al., 2015
		δ			ATP synthase delta chain, chloroplastic		gi|1168587	↓(10% PEG 6000, 14h)							Saccharum officinarum	Zhou et al.,2012
					ATP synthase subunit b, chloroplastic	TC313680			↓(drought, 14d, Excalibur)↓(drought, 5d, RAC875)	↓(drought, 24d, Excalibur)↓(drought, 24d, Kukri)	↓(rewater, 25d, Excalibur)↓(rewater, 25d, Kukri)↓(rewater, 25d, RAC875)				Triticum aestivum L.	Ford et al., 2011
					ATP synthase subunit beta			↑(not irrigation, 10d, Midnight)↓(not irrigation, 10d, Brilliant)	↓(not irrigation, 15d, Midnight)↓(not irrigation, 15d, Brilliant)						Kentucky Bluegrass	Xu et al.,2010
					ATP synthase subunit beta	NP_001105340.1	GI:162462751	↑(10% PEG6000, 4d)							Glycine max L.	Mohammadi et al., 2012
					ATP synthase subunit beta	NP_001056261.1	GI:115465323	↓(10% PEG6000, 4d)	↓(drought,4d)						Glycine max L.	Mohammadi et al., 2012
					ATP synthase subunit beta	NP_001056261.1	GI:115465323	↑(10% PEG6000, 4d)	↑(drought,4d)						Glycine max L.	Mohammadi et al., 2012
					ATP synthase subunit beta cp	Q2L917		↓(dry season, 6 month)							Eucalyptus	Bedon et al., 2012
					ATP synthase subunit beta cp	Q49KZ1		↓(dry season, 6 month)							Eucalyptus	Bedon et al., 2012
					ATP synthase subunit beta cp	Q49KZ1		↓(dry season, 6 month)							Eucalyptus	Bedon et al., 2012
					ATP synthase subunit beta mt	P19023		↓(dry season, 6 month)							Eucalyptus	Bedon et al., 2012
					ATP synthase δ subunit precursor	AAA34024		↑(25% relative humidity, 48h)	↑(25% relative humidity, 120h)	↑(rewater 75% relative humidity, 24h)					Carissa spinarum	Zhang et al.,2010
					ATP synthase subunit mitochondrial-like	AT5G13450		↓(no watering, 3d)	↑(no watering, 7d)	↓(no watering, 10d)	↓(no watering, 14d)				Brassica napus	Koh et al., 2015
					ATP synthase subunit delta mitochondrial-like	AT5G47030			↑(no watering, 7d)		↓(no watering, 14d)				Brassica napus	Koh et al., 2015
					ATP synthase delta chloroplastic-like	AT4G09650			↑(no watering, 7d)	↑(no watering, 10d)	↑(no watering, 14d)				Brassica napus	Koh et al., 2015
		ε			ATP synthase subunit epsilon, mitochondrial			↓(35% RWC)							Gossypium herbaceum L.	Deeba et al., 2012
					ATP synthase CF1 epsilon subunit		gi|91208908	↓(no irrigation, 107d)							Cistus albidus	Brossa et al., 2015
		CF0			ATP synthase CF0 subunit b	AEI70756.1	gi|166619466	↓(12.5% soil water, 6d, 2023)↑(12.5% soil water, 6d, CE704)							Zea mays L.	Benesova et al. 2012
		F1-ATPase			Mitochondrial F1-ATPase beta subunit	218147		↑(30% relative water content)							Sporobolus stapﬁanus	Oliver et al.,2011
					Mitochondrial F1-ATPase beta subunit	218147		↑(30% relative water content)							Sporobolus stapﬁanus	Oliver et al.,2011
		F0-ATPase			ATP synthase F0 subunit 1	89280711		↓(30% relative water content)							Sporobolus stapﬁanus	Oliver et al.,2011
					ATP synthase F0 subunit 1		gi|194033257	↓( PEG6000, 48h)							Triticum aestivum L.	Zhang et al.,2014
	cytochrome c oxidase	CCO	4		Possible: putative cytochrome c oxidase subunit II PS17		gi|109892850	↑(25% soil water, NT)	↑(25% soil water, SAG12-ipt)						Agrostis stolonifera	Merewitz et al., 2011
					Putative cytochrome c oxidase subunit II PS17	gi|109892850		↓(not irrigation, 9d, Kn)							Triticum aestivum L.	Budak et al.,2013
					Putative cytochrome c oxidase subunit II PS17	gi|109892850									Triticum aestivum L.	Budak et al.,2013
					cytochrome c oxidase subunit 5b-1	AT3G15640			↑(no watering, 7d)	↓(no watering, 10d)					Brassica napus	Koh et al., 2015
	Electron carrier/iron ion binding protein	ETCDB	1		Electron carrier/iron ion binding protein	NP_001147712.1	gi|149069674	↓(12.5% soil water, 6d, 2023)↓(12.5% soil water, 6d, CE704)							Zea mays L.	Benesova et al. 2012
	NADH dehydrogenase (ubiquinone) flavoprotein	NDUFV	4		nadh dehydrogenase	AT3G12260				↓(no watering, 10d)	↓(no watering, 14d)				Brassica napus	Koh et al., 2015
					nadh dehydrogenase	AT5G67590				↑(no watering, 10d)					Brassica napus	Koh et al., 2015
					nad h dehydrogenase subunit 48	AT1G15980				↑(no watering, 10d)					Brassica napus	Koh et al., 2015
					probable nadh dehydrogenase	AT5G52840		↑(no watering, 3d)	↑(no watering, 7d)	↓(no watering, 10d)					Brassica napus	Koh et al., 2015
	Quinone oxidoreductase	——	8		Quinone oxidoreductase-like protein At1g23740, chloroplastic-like		gi|356567630	↓(no irrigation, 17d, Starozagorski)							Phaseolus vulgaris	Zadraznik et al.,2013
					Quinone oxidoreductase-like protein At1g23740, chloroplastic-like		gi|356567630	↓(no irrigation, 17d, Starozagorski)							Phaseolus vulgaris	Zadraznik et al.,2013
					Quinone oxidoreductase-like protein	Q94F67									Quercus ilex	Echevarrı´a-Zomen˜o et al., 2009
					Quinone reductase family protein	TC282248			↑(drought, 14d, Kukri)		↓(rewater, 25d, Excalibur)				Triticum aestivum L.	Ford et al., 2011
					nad h-quinone oxidoreductase subunit chloroplastic	AT4G37925			↓(no watering, 7d)	↑(no watering, 10d)	↑(no watering, 14d)				Brassica napus	Koh et al., 2015
					quinone oxidoreductase-like protein chloroplastic	AT1G23740		↑(no watering, 3d)	↑(no watering, 7d)	↑(no watering, 10d)	↑(no watering, 14d)				Brassica napus	Koh et al., 2015
					flavodoxin-like quinone reductase 1(FQR1)	AT5G54500			↓(no watering, 7d)	↓(no watering, 10d)					Brassica napus	Koh et al., 2015
					Predicted protein Hordeum vulgare ssp. vulgare homologous to mitochondrial NADH-ubiquinone oxidoreductase 75 kDa subunit		gi|326511988	↑(withhold water to −2.5 Mpa soil water potential, 3 week)							Hordeum spontaneum	Ashoub et al., 2015
	11.2 Glycolysis/Gluconeogenesis (196)
	Alcohol dehydrogenase	ADH	2		Alcohol dehydrogenase		gi|15384066	↑(10% soil water content, 45d, HY)	↑(10% soil water content, 45d, LD)						Populus cathayana	Xiao et al.,2009
					Class III Alcohol dehydrogenase										Agrostis stolonifera	Merewitz et al., 2011
	Fructokinase	——	1		probable fructokinase- chloroplastic isoform x1	AT1G66430			↓(no watering, 7d)	↓(no watering, 10d)					Brassica napus	Koh et al., 2015
	Glyceraldehyde-3-phosphate dehydrogenase	GAPDH	63		GAPDH A, chloroplast			↓(25% soil water, NT)							Agrostis stolonifera	Merewitz et al., 2011
					GAPDH A, chloroplast			↓(25% soil water, NT)							Agrostis stolonifera	Merewitz et al., 2011
					GAPDH A, chloroplast										Agrostis stolonifera	Merewitz et al., 2011
					GAPDH B, chloroplast precursor										Agrostis stolonifera	Merewitz et al., 2011
					GAPDH B, chloroplast precursor			↑(25% soil water, NT)							Agrostis stolonifera	Merewitz et al., 2011
					GAPDH B, chloroplast precursor										Agrostis stolonifera	Merewitz et al., 2011
					GAPDH, cytosolic			↓(25% soil water, NT)	↓(25% soil water, SAG12-ipt)						Agrostis stolonifera	Merewitz et al., 2011
					GAPDH, cytosolic			↓(25% soil water, NT)							Agrostis stolonifera	Merewitz et al., 2011
					GAPDH, cytosolic			↓(25% soil water, NT)	↑(25% soil water, SAG12-ipt)						Agrostis stolonifera	Merewitz et al., 2011
					Glyceraldehyde-3-phosphate dehydrogenase		gi|300068297	↓(no irrigation, 107d)							Cistus albidus	Brossa et al., 2015
					Glyceraldehyde-3-phosphate dehydrogenase (GAPDH A), chloroplast				↑(25% soil water, SAG12-ipt)						Agrostis stolonifera	Merewitz et al., 2011
					Glyceraldehyde-3-phosphate dehydrogenase B subunit		gi|351726690	↓(no irrigation, 107d)							Cistus albidus	Brossa et al., 2015
					GAPDH A, chloroplast										Kentucky Bluegrass	Xu et al.,2010
					GAPDH A, chloroplast			↓(not irrigation, 10d, Brilliant)	↓(not irrigation, 15d, Midnight)↓(not irrigation, 15d, Brilliant)						Kentucky Bluegrass	Xu et al.,2010
					GAPDH B, chloroplast precursor			↓(not irrigation, 10d, Brilliant)							Kentucky Bluegrass	Xu et al.,2010
					GAPDH, cytosolic			↑(not irrigation, 10d, Midnight)↓(not irrigation, 10d, Brilliant)							Kentucky Bluegrass	Xu et al.,2010
					GAPDH, cytosolic				↑(not irrigation, 15d, Brilliant)						Kentucky Bluegrass	Xu et al.,2010
					GAPDH¶, cytosolic			↓(not irrigation, 10d, Midnight)↓(not irrigation, 10d, Brilliant)							Kentucky Bluegrass	Xu et al.,2010
					Glyceraldehyde 3-phosphate dehydrogenase		gi|87300266	↑(no irrigation,7d)							Medicago sativa L.	Aranjuelo et al., 2011
					Glyceraldehyde 3-phosphate dehydrogenase B	TC291884		↓(drought, 5d, RAC875)	↓(drought, 14d, Kukri)	↓(drought, 24d, Excalibur)↓(drought, 24d, Kukri)	↓(rewater, 25d, Kukri)				Triticum aestivum L.	Ford et al., 2011
					Glyceraldehyde 3-phosphate dehydrogenase, putative		gi|255543455		↑(35% soil water, 14d)						Populus tremula L. × P. alba L.-clone INRA 717–1-B4	Bohler,et al., 2013
					Glyceraldehyde 3-phosphate dehydrogenase, putative		gi|223550350	↓(withholding water, 8d)							Populus tremulaL.×P. albaL.	Durand et al.,2011
					Glyceraldehyde 3-phosphate dehydrogenase, putative		gi|223547801			↓(rewater,7d)					Populus tremulaL.×P. albaL.	Durand et al.,2011
					Glyceraldehyde 3-phosphate dehydrogenase, putative		gi|223549471		↑(withholding water, 12d)						Populus tremulaL.×P. albaL.	Durand et al.,2011
					Glyceraldehyde 3-phosphate dehydrogenase, putative		gi|223550350			↓(rewater,7d)					Populus tremulaL.×P. albaL.	Durand et al.,2011
					Glyceraldehyde-3-phosphate dehydrogenase A,chloroplastic	P09043		↓(25% field capacity, 28d, non-inoculated)↑(25% field capacity, 28d, Piriformospora indica-inoculated)							Hordeum vulgare L.	Ghabooli et al.,2013
					Cytosolic glyceraldehyde-3-phosphate dehydrogenase		gi|120680	↑(10 % ﬁeld capacity, 5d, # 15141)							Hordeum vulgare L.	Ashoub et al., 2013
					Glyceraldehyde 3-phosphate dehydrogenase (GAPDH), cytosolic			↑(not irrigation, 10d, Midnight)	↑(not irrigation, 15d, Midnight)↑(not irrigation, 15d, Brilliant)						Kentucky Bluegrass	Xu et al.,2010
					Glyceraldehyde 3-phosphate dehydrogenase 1	TC277364					↑(rewater, 25d, Excalibur)				Triticum aestivum L.	Ford et al., 2011
					Glyceraldehyde 3-phosphate dehydrogenase 2	TC304401		↓(drought, 5d, RAC875)	↑(drought, 14d, Excalibur)↑(drought, 14d, RAC875)	↑(drought, 24d, Excalibur)↑(drought, 24d, RAC875)	↑(rewater, 25d, Excalibur)				Triticum aestivum L.	Ford et al., 2011
					Glyceraldehyde 3-phosphate dehydrogenase A	TC284354				↓(drought, 24d, Excalibur)					Triticum aestivum L.	Ford et al., 2011
					Glyceraldehyde 3-phosphate dehydrogenase β subunit		gi|336390		↓(25% soil water, SAG12-ipt)						Agrostis stolonifera	Merewitz et al., 2011
					Glyceraldehyde 3-phosphate dehydrogenase, putative		gi|255539282	↓(no irrigation, 107d)							Cistus albidus	Brossa et al., 2015
					Glyceraldehyde-3-dehydrogenase C subunit	ABA07956.1	GI:74475508	↑(10% PEG6000, 4d)							Glycine max L.	Mohammadi et al., 2012
					Glyceraldehyde-3-phosphate dehydrogenase	115450493		↑(30% relative water content)							Sporobolus stapﬁanus	Oliver et al.,2011
					Glyceraldehyde-3-phosphate dehydrogenase	2331137		↑(30% relative water content)							Sporobolus stapﬁanus	Oliver et al.,2011
					Glyceraldehyde-3-phosphate dehydrogenase	115474601		↑(30% relative water content)							Sporobolus stapﬁanus	Oliver et al.,2011
					Glyceraldehyde-3-phosphate dehydrogenase	115450493		↑(30% relative water content)							Sporobolus stapﬁanus	Oliver et al.,2011
					Glyceraldehyde-3-phosphate dehydrogenase A		gi|120658	↑(no irrigation,7d)							Medicago sativa L.	Aranjuelo et al., 2011
					Glyceraldehyde-3-phosphate dehydrogenase A (EC 1.2.1.13)	P12858		↓(25% field capacity, 18d)							Populus deltoides×Populus nigra	Bonhomme et al.,2009
					Glyceraldehyde-3-phosphate dehydrogenase A, chloroplast precursor		gi|120658	↑(no irrigation,7d)							Medicago sativa L.	Aranjuelo et al., 2011
					Glyceraldehyde-3-phosphate dehydrogenase A, chloroplastic	P09043		↓(25% field capacity, 28d, Piriformospora indica-inoculated)							Hordeum vulgare L.	Ghabooli et al.,2013
					Glyceraldehyde-3-phosphate dehydrogenase A, chloroplastic		gi|120661		↓(drought, 15d)						Poa pratensis L.	Xu amd Huang, 2012
					Glyceraldehyde-3-phosphate dehydrogenase A, chloroplastic		gi|120661		↓(drought, 15d)						Poa pratensis L.	Xu amd Huang, 2012
					Glyceraldehyde-3-phosphate dehydrogenase A, chloroplastic （Glycolysis）		gi|120659		↓(withholding irrigation, 15d, C299)						Cynodon dactylon L. Pers. ×Cynodon transvaalensis Burtt Davy, cv. Tifway,Cynodon dactylon L.	Zhao et al., 2011
					Glyceraldehyde-3-phosphate dehydrogenase A, subunit		gi|120658	↑(no irrigation,7d)							Medicago sativa L.	Aranjuelo et al., 2011
					Glyceraldehyde-3-phosphate dehydrogenase A. chloroplastic	P09315		↑(1/3 of field capacity, 14h, Mutant)							Triticum aestivum L.	Peremarti et al.,2014
					Glyceraldehyde-3-phosphate dehydrogenase B, chloroplastic		gi|120663		↓(drought, 15d)						Poa pratensis L.	Xu amd Huang, 2012
					Glyceraldehyde-3-phosphate dehydrogenase, cytosolic		gi|120668		↑(25% soil water, SAG12-ipt)						Agrostis stolonifera	Merewitz et al., 2011
					Glyceraldehyde-3-phosphate dehydrogenase, cytosolic		gi|120666	↑(no irrigation, 17d, Starozagorski)							Phaseolus vulgaris	Zadraznik et al.,2013
					Glyceraldehyde-3-phosphate dehydrogenase, cytosolic 3		gi|6166167		↑(withholding irrigation, 15d, C299)						Cynodon dactylon L. Pers. ×Cynodon transvaalensis Burtt Davy, cv. Tifway,Cynodon dactylon L.	Zhao et al., 2011
					Glyceraldehyde-3-phosphate dehydrogenase∗			↑(0.21 M sorbitol, 48d)							Musa paradisiaca	Vanhove et al., 2012
					NADP-dependent glyceraldehyde-3-phosphate dehydrogenase	TC346117					↑(rewater, 25d, Excalibur)				Triticum aestivum L.	Ford et al., 2011
					Glyceraldehyde-3-phosphate dehydrogenase, putative, expressed			↓(stop irrigation 35d,481-B)			Downregulated				Oryza sativa L.	Raorane et al., 2015
					Glyceraldehyde-3-phosphate dehydrogenase, putative, expressed			↑(stop irrigation 35d,481-B)			Upregulated				Oryza sativa L.	Raorane et al., 2015
					Glyceraldehyde-3-Phosphate dehydrogenase, putative, expressed			↓(stop irrigation 35d,481-B)			Downregulated				Oryza sativa L.	Raorane et al., 2015
					Glyceraldehyde-3-phosphate dehydrogenase		AT1G16300.1	↓(45–55% field capacity, Qinguan)more tolerant	=						Malus domestica Borkh.	Zhou et al., 2015
					Glyceraldehyde-3-phosphate dehydrogenase		AT1G12900.1	=	↓(45–55% field capacity, Naganofuji No. 2)						Malus domestica Borkh.	Zhou et al., 2015
					glyceraldehyde-3-phosphate dehydrogenase B subunit	AT1G42970		↑(no watering, 3d)	↑(no watering, 7d)	↑(no watering, 10d)	↑(no watering, 14d)				Brassica napus	Koh et al., 2015
					glyceraldehyde-3-phosphate dehydrogenase A subunit	AT3G26650				↑(no watering, 10d)	↑(no watering, 14d)				Brassica napus	Koh et al., 2015
					glyceraldehyde-3-phosphate dehydrogenase A subunit 2	AT1G12900		↓(no watering, 3d)							Brassica napus	Koh et al., 2015
					glyceraldehyde-3-phosphate dehydrogenase C subunit	AT3G04120					↑(no watering, 14d)				Brassica napus	Koh et al., 2015
					nadp-dependent glyceraldehyde-3-phosphate dehydrogenase	AT2G24270			↓(no watering, 7d)		↓(no watering, 14d)				Brassica napus	Koh et al., 2015
	Pyruvate kinase	PK	1		Pyruvate kinase (cytosolic)	NP_001149198.1	gi|111433847	↓(12.5% soil water, 6d, 2023)↑(12.5% soil water, 6d, CE704)							Zea mays L.	Benesova et al. 2012
	Triosephosphate isomerase	TPI	24		Triosephosphate isomerase	TC300777		↓(drought, 5d, Kukri)↓(drought, 5d, RAC875)	↓(drought, 14d, Kukri)	↓(drought, 24d, Excalibur)↓(drought, 24d, Kukri)↓(drought, 24d, RAC875)	↓(rewater, 25d, RAC875)				Triticum aestivum L.	Ford et al., 2011
					Triosephosphate isomerase		gi|553107	↑(50 % water lost daily, 20 d)							Upland Oryza sativa L.	Rabello et al.,2014
					Triosephosphate isomerase	TC335873		↓(drought, 5d, RAC875)	↓(drought, 14d, Kukri)		↑(rewater, 25d, Kukri)				Triticum aestivum L.	Ford et al., 2011
					Triose-phosphate isomerase	NP_179713		↑(25% relative humidity, 48h)	↓(25% relative humidity, 120h)	↓(rewater 75% relative humidity, 24h)					Carissa spinarum	Zhang et al.,2010
					Triose-phosphate isomerase	169821				↑(30% relative humidity, 96h)	↑(30% relative humidity, 120h)	↑(30% relative humidity, 144h)	↑(30% relative humidity, 168h)	↑(30% relative humidity, 192h)	Oryza sativa L.	Pandey et al.,2010
					Triose-phosphate isomerase		gi|57283985	↑(no irrigation, 17d,Tiber)↑(no irrigation, 17d, Starozagorski)							Phaseolus vulgaris	Zadraznik et al.,2013
					Triosephosphate isomerase, chloroplast precursor			↑(not irrigation, 10d, Midnight)	↑(not irrigation, 15d, Midnight)↑(not irrigation, 15d, Brilliant)						Kentucky Bluegrass	Xu et al.,2010
					Triosephosphate isomerase, chloroplast precursor			↓(25% soil water, NT)							Agrostis stolonifera	Merewitz et al., 2011
					Triosephosphate isomerase, cytosolic		gi|1351279	↑(no irrigation, 107d)							Cistus albidus	Brossa et al., 2015
					Triosephosphate isomerase, cytosolic	P21820		↓(no irrigation, 14d)	↓(no irrigation 7d +rewater 7d)						Quercus ilex	Echevarrı´a-Zomen˜o et al., 2009
					Putative Triosephosphate isomerase, chloroplast	50725810				↓(30% relative humidity, 96h)	↓(30% relative humidity, 120h)		↓(30% relative humidity, 168h)	↓(30% relative humidity, 192h)	Oryza sativa L.	Pandey et al.,2010
					Triosephosphate isomerase, cytosolic	P21820		↓(no irrigation, 14d)	↓(no irrigation 7d +rewater 7d)						Quercus ilex	Echevarrı´a-Zomen˜o et al., 2009
					Triosephosphate isomerase, cytosolic;		gi|2507469		↓(25% soil water, SAG12-ipt)						Agrostis stolonifera	Merewitz et al., 2011
					Triosephosphate isomerase, putative		gi|223531284			↑(rewater,7d)					Populus tremulaL.×P. albaL.	Durand et al.,2011
					Triosephosphate isomerase, putative		gi|255576721	↑(no irrigation, 17d, Tiber)							Phaseolus vulgaris	Zadraznik et al.,2013
					Triosephosphate isomerase,putative	223531284	GO:0005975		↓(15% soil water, 8d)						Quercus robur L.	Sergeant et al.,2011
					Triosephosphate-isomerase		gi|326496613	↓(20-25% SRWC, 3d)	↓(35-40% SRWC, 2d+20-25% SRWC, 3d)	↓(35-40% SRWC, 7-9d+35-40% SRWC, 7-9d+20-25% SRWC, 8d)					Triticum aestivum L.	Wang et al., 2014
					Triosephosphat-isomerase		gi|11124572	↓(drought, 10d)	↓(drought, 15d)						Poa pratensis L.	Xu amd Huang, 2012
					Triosphosphate isomerase,cytosolic	P48494			↑(withhold water 43d, CT9993,TR62266)						Oryza sativa L.	Salekdeh et al., 2002
					Triosphosphate isomerase-like protein		gi|76573375	↑(not irrigation, 28d, GSE)↑(not irrigation, 28d, SSE)							Quercus ilex	Valero-Galvan et al.,2013
					Triosephosphate isomerase, cytosolic, putative, expressed			↑(stop irrigation 35d,481-B)			Upregulated				Oryza sativa L.	Raorane et al., 2015
					Triosephosphate isomerase, chloroplast precursor, putative, expressed			↓(stop irrigation 35d,481-B)			Downregulated				Oryza sativa L.	Raorane et al., 2015
					triosephosphate isomerase, chloroplastic	AT2G21170					↑(no watering, 14d)				Brassica napus	Koh et al., 2015
					triosephosphate isomerase, cytosolic-like	AT3G55440		↑(no watering, 3d)			↑(no watering, 14d)				Brassica napus	Koh et al., 2015
	Fructose-bisphosphate aldolase	FBPA	57		Cytoplasmic aldolase				↑(not irrigation, 15d, Midnight)						Kentucky Bluegrass	Xu et al.,2010
					Cytoplasmic aldolase	218157		↑(30% relative water content)							Sporobolus stapﬁanus	Oliver et al.,2011
					Cytoplasmic aldolase										Agrostis stolonifera	Merewitz et al., 2011
					Cytoplasmic aldolase				↑(25% soil water, SAG12-ipt)						Agrostis stolonifera	Merewitz et al., 2011
					Cytoplasmic fructose-biphosphate (FBP) aldolase				↑(not irrigation, 15d, Midnight)↑(not irrigation, 15d, Brilliant)						Kentucky Bluegrass	Xu et al.,2010
					Fructose-1.6-diphosphate aldolase			↑(0.21 M sorbitol, 48d)							Musa paradisiaca	Vanhove et al., 2012
					Fructose-bisphosphate aldolase		gi|2407279		↓(withholding irrigation, 15d, C299)						Cynodon dactylon L. Pers. ×Cynodon transvaalensis Burtt Davy, cv. Tifway,Cynodon dactylon L.	Zhao et al., 2011
					Cytoplasmic fructose-biphosphate (FBP) aldolase				↓(25% soil water, SAG12-ipt)						Agrostis stolonifera	Merewitz et al., 2011
					Fructose 1,6-bisphosphate aldolase precursor		gi|8272480		↓(drought, 15d)						Poa pratensis L.	Xu amd Huang, 2012
					Fructose 1,6-bisphosphate aldolase precursor		gi|8272480		↓(drought, 15d)						Poa pratensis L.	Xu amd Huang, 2012
					Fructose bisphosphate aldolase			↑(0.21 M sorbitol, 48d)							Musa paradisiaca	Vanhove et al., 2012
					Fructose-1,6-bisphosphatase	TC277182		↓(drought, 5d, RAC875)		↓(drought, 24d, Excalibur)	↓(rewater, 25d, Kukri)				Triticum aestivum L.	Ford et al., 2011
					Fructose-1,6-bisphosphatase	3041777			↑(30% relative humidity, 72h)	↑(30% relative humidity, 96h)	↑(30% relative humidity, 120h)	↑(30% relative humidity, 144h)	↑(30% relative humidity, 168h)	↑(30% relative humidity, 192h)	Oryza sativa L.	Pandey et al.,2010
					Fructose-1,6-bisphosphatase	3041777							↑(30% relative humidity, 168h)	↑(30% relative humidity, 192h)	Oryza sativa L.	Pandey et al.,2010
					Fructose-1,6-bisphosphatase	3041777							↑(30% relative humidity, 168h)	↑(30% relative humidity, 192h)	Oryza sativa L.	Pandey et al.,2010
					Fructose-1,6-bisphosphatase	TC278687		↓(drought, 5d, RAC875)	↓(drought, 14d, Kukri)	↓(drought, 24d, Excalibur)	↑(rewater, 25d, Excalibur)				Triticum aestivum L.	Ford et al., 2011
					Fructose-1,6-bisphosphatase		gi|5305145	↓(drought, 10d)	↓(drought, 15d)						Poa pratensis L.	Xu amd Huang, 2012
					Fructose-bisphosphate aldolase	TC323920		↓(drought, 5d, RAC875)	↓(drought, 14d, Kukri)	↓(drought, 24d, Excalibur)	↓(rewater, 25d, RAC875)				Triticum aestivum L.	Ford et al., 2011
					Fructose-bisphosphate aldolase	108864047				↑(30% relative humidity, 96h)	↑(30% relative humidity, 120h)	↑(30% relative humidity, 144h)	↑(30% relative humidity, 168h)	↑(30% relative humidity, 192h)	Oryza sativa L.	Pandey et al.,2010
					Fructose-bisphosphate aldolase	TC280231				↑(drought, 24d, RAC875)	↑(rewater, 25d, Excalibur)				Triticum aestivum L.	Ford et al., 2011
					Fructose-bisphosphate aldolase	TC296359									Triticum aestivum L.	Ford et al., 2011
					Fructose-bisphosphate aldolase	TC296818		↓(drought, 5d, RAC875)							Triticum aestivum L.	Ford et al., 2011
					Fructose-bisphosphate aldolase		gi|22633	↓(no irrgation, 3d)							Citrullus lanatus	Akashi et al., 2011
					Fructose-bisphosphate aldolase		gi|22633	↓(no irrgation, 3d)							Citrullus lanatus	Akashi et al., 2011
					Fructose-bisphosphate aldolase (EC 4.1.2.13)	A7QE19		↓(25% field capacity, 18d)							Populus deltoides×Populus nigra	Bonhomme et al.,2009
					Fructose-bisphosphate aldolase 1	TC281478		↓(drought, 5d, RAC875)	↓(drought, 14d, Kukri)	↓(drought, 24d, Excalibur)					Triticum aestivum L.	Ford et al., 2011
					Fructose-bisphosphate aldolase 1		gi|399024	↓(no irrigation,7d)							Medicago sativa L.	Aranjuelo et al., 2011
					Fructose-bisphosphate aldolase 1 cp	Q9SJU4		↓(dry season, 6 month)							Eucalyptus	Bedon et al., 2012
					Fructose-bisphosphate aldolase 2		gi|326499908	↓(20-25% SRWC, 3d)	↓(35-40% SRWC, 2d+20-25% SRWC, 3d)	↓(35-40% SRWC, 7-9d+35-40% SRWC, 7-9d+20-25% SRWC, 8d)					Triticum aestivum L.	Wang et al., 2014
					Fructose-bisphosphate aldolase, cytoplasmic isozyme 1		gi|1168408	↓(no irrigation, 17d, Starozagorski)							Phaseolus vulgaris	Zadraznik et al.,2013
					Fructose-bisphosphate aldolase, cytoplasmic isozyme 1-like		gi|326493652	—	↓(35-40% SRWC, 2d+20-25% SRWC, 3d)	↓(35-40% SRWC, 7-9d+35-40% SRWC, 7-9d+20-25% SRWC, 8d)					Triticum aestivum L.	Wang et al., 2014
					Fructose-bisphosphate aldolase, cytoplasmic isozyme 1-like		gi|326523629	↓(20-25% SRWC, 3d)	↓(35-40% SRWC, 2d+20-25% SRWC, 3d)	↓(35-40% SRWC, 7-9d+35-40% SRWC, 7-9d+20-25% SRWC, 8d)					Triticum aestivum L.	Wang et al., 2014
					Fructose-bisphosphate aldolase, cytoplasmic isozyme 1-like		gi|326499908	↓(20-25% SRWC, 3d)	↓(35-40% SRWC, 2d+20-25% SRWC, 3d)	↓(35-40% SRWC, 7-9d+35-40% SRWC, 7-9d+20-25% SRWC, 8d)					Triticum aestivum L.	Wang et al., 2014
					Fructose-bisphosphate aldolase, cytoplasmic isozyme-like		gi|356500825	↑(no irrigation, 17d, Tiber)							Phaseolus vulgaris	Zadraznik et al.,2013
					Fructose-bisphosphate aldolase, cytoplasmic isozyme-like		gi|356500825	↑(no irrigation, 17d, Starozagorski)							Phaseolus vulgaris	Zadraznik et al.,2013
					Fructose-bisphosphate aldolase, putative		gi|56122688	↓(withholding water, 8d)							Populus tremulaL.×P. albaL.	Durand et al.,2011
					Fructose-bisphosphate aldolase, putative		gi|223541223		↓(withholding water, 12d)	↓(rewater,7d)					Populus tremulaL.×P. albaL.	Durand et al.,2011
					Fructose-bisphosphate aldolase, putative		gi|56122688	↓(withholding water, 8d)							Populus tremulaL.×P. albaL.	Durand et al.,2011
					Fructose-bisphosphate aldolase, putative		gi|223541223		↓(withholding water, 12d)	↓(rewater,7d)					Populus tremulaL.×P. albaL.	Durand et al.,2011
					Fructose-bisphosphate aldolase, putative		gi|223541223			↓(rewater,7d)					Populus tremulaL.×P. albaL.	Durand et al.,2011
					FBP aldolase precursor			↓(not irrigation, 10d, Brilliant)	↓(not irrigation, 15d, Midnight)↓(not irrigation, 15d, Brilliant)						Kentucky Bluegrass	Xu et al.,2010
					FBP aldolase precursor			↓(not irrigation, 10d, Brilliant)	↓(not irrigation, 15d, Brilliant)						Kentucky Bluegrass	Xu et al.,2010
					Fructose-bisphosphate aldolase isozyme, putative, expressed			↑(stop irrigation 35d,481-B)			Upregulated				Oryza sativa L.	Raorane et al., 2015
					Fructose-bisphosphate aldolase isozyme, putative, expressed			↓(stop irrigation 35d,481-B)			Downregulated				Oryza sativa L.	Raorane et al., 2015
					Fructose-bisphosphate aldolase isozyme, putative, expressed			↓(stop irrigation 35d,481-B)			Downregulated				Oryza sativa L.	Raorane et al., 2015
					Fructose-bisphosphate aldolase isozyme, putative, expressed			↓(stop irrigation 35d,481-B)			Downregulated				Oryza sativa L.	Raorane et al., 2015
					Fructose-1,6-bisphosphatase, putative, expressed			↑(stop irrigation 35d,481-B)			Upregulated				Oryza sativa L.	Raorane et al., 2015
					Fructose-1,6-bisphosphatase, putative, expressed			↓(stop irrigation 35d,481-B)			Downregulated				Oryza sativa L.	Raorane et al., 2015
					Fructose-1,6-bisphosphatase, putative, expressed			↑(stop irrigation 35d,481-B)			Upregulated				Oryza sativa L.	Raorane et al., 2015
					Fructose-1,6-bisphosphatase	AT3G54050.2		=	↓(45–55% field capacity, Naganofuji No. 2)						Malus domestica Borkh.	Zhou et al., 2015
					fructose- -bisphosphatase	AT3G54050					↑(no watering, 14d)				Brassica napus	Koh et al., 2015
					fructose-bisphosphate aldolase 1	AT2G21330			↑(no watering, 7d)	↑(no watering, 10d)					Brassica napus	Koh et al., 2015
					fructose-bisphosphate aldolase 2	AT4G38970			↓(no watering, 7d)						Brassica napus	Koh et al., 2015
					fructose-bisphosphate aldolase 5, cytoplasmic isozyme 1	AT4G26530				↑(no watering, 10d)					Brassica napus	Koh et al., 2015
					fructose-bisphosphate aldolase 8, cytoplasmic isozyme-like	AT3G52930				↑(no watering, 10d)	↑(no watering, 14d)				Brassica napus	Koh et al., 2015
					fructose-bisphosphate aldolase 2	AT4G38970		↑(no watering, 3d)	↑(no watering, 7d)	↑(no watering, 10d)	↑(no watering, 14d)				Brassica napus	Koh et al., 2015
					Fructose-1,6-bisphosphate aldolase	C0PD30		↑（withholding water, 9 d）							Zea mays	Sanggon et al., 2015
	Phosphoglycerate kinase	PGK	20		Phosphoglycerate kinase		gi|15219412	↑(no irrigation, 107d)							Cistus albidus	Brossa et al., 2015
					Phosphoglycerate kinase (EC 2.7.2.3)	O82160		↓(25% field capacity, 18d)		↓(no irrigation, 86d)					Populus deltoides×Populus nigra	Bonhomme et al.,2009
					phosphoglycerate kinase 1	TC278059		↓(drought, 5d, RAC875)	↓(drought, 14d, Kukri)	↓(drought, 24d, Excalibur)↓(drought, 24d, Kukri)					Triticum aestivum L.	Ford et al., 2011
					Phosphoglycerate kinase cytosolic	Q42962		↓(dry season, 6 month)							Eucalyptus	Bedon et al., 2012
					Phosphoglycerate kinase family protein	115440503		↑(30% relative water content)							Sporobolus stapﬁanus	Oliver et al.,2011
					Phosphoglycerate kinase family protein	115440503		↑(30% relative water content)							Sporobolus stapﬁanus	Oliver et al.,2011
					Phosphoglycerate kinase, chloroplast precursor			↓(not irrigation, 10d, Brilliant)							Kentucky Bluegrass	Xu et al.,2010
					Phosphoglycerate kinase, cytosolic		gi|121485004	↑(not irrigation, 28d, GSE)↑(not irrigation, 28d, SSE)							Quercus ilex	Valero-Galvan et al.,2013
					Phosphoglycerate kinase, cytosolic	115444481		↑(30% relative water content)							Sporobolus stapﬁanus	Oliver et al.,2011
					Phosphoglycerate kinase, cytosolic	115444481		↑(30% relative water content)							Sporobolus stapﬁanus	Oliver et al.,2011
					Phosphoglycerate kinase, cytosolic	115444481		↑(30% relative water content)							Sporobolus stapﬁanus	Oliver et al.,2011
					Phosphoglycerate kinase, chloroplastic	Q42961		↑(25% field capacity, 28d, Piriformospora indica-inoculated)							Hordeum vulgare L.	Ghabooli et al.,2013
					Phosphoglycerate kinase, chloroplastic	P12782		↑(25% field capacity, 28d, non-inoculated)							Hordeum vulgare L.	Ghabooli et al.,2013
					Phosphoglycerate kinase		gi|129915	↓(20-25% SRWC, 3d)	—	↓(35-40% SRWC, 7-9d+35-40% SRWC, 7-9d+20-25% SRWC, 8d)					Triticum aestivum L.	Wang et al., 2014
					phosphoglycerate kinase	AT3G12780				↑(no watering, 10d)					Brassica napus	Koh et al., 2015
					phosphoglycerate kinase	AT3G12780		↑(no watering, 3d)	↑(no watering, 7d)	↑(no watering, 10d)	↑(no watering, 14d)				Brassica napus	Koh et al., 2015
					phosphoglycerate kinase	AT1G79550				↑(no watering, 10d)	↑(no watering, 14d)				Brassica napus	Koh et al., 2015
					Putative chloroplast phosphoglycerate kinase	46981258		↑(30% relative water content)							Sporobolus stapﬁanus	Oliver et al.,2011
					Putative chloroplast phosphoglycerate kinase	46981258		↑(30% relative water content)							Sporobolus stapﬁanus	Oliver et al.,2011
					Putative chloroplast phosphoglycerate kinase	46981258		↑(30% relative water content)							Sporobolus stapﬁanus	Oliver et al.,2011
	Phosphoglycerate mutase	PGM	2		Phosphoglyceromutase			↑(0.21 M sorbitol, 48d)							Musa paradisiaca	Vanhove et al., 2012
					phosphoglycerate mutase,phosphoglycerate -bisphosphoglycerate-independent	AT3G08590				↑(no watering, 10d)					Brassica napus	Koh et al., 2015
	Phosphoenol pyruvate carboxykinase	PEPCK	2		Phosphoenolpyruvate carboxykinase	NP_001146178.1	gi|148930870	↓(12.5% soil water, 6d, 2023)↓(12.5% soil water, 6d, CE704)							Zea mays L.	Benesova et al. 2012
					Phosphoenolpyruvate carboxykinase	dbj|AB018744.1|	gi|149075345	↓(12.5% soil water, 6d, 2023)↓(12.5% soil water, 6d, CE704)							Zea mays L.	Benesova et al. 2012
	Phosphoglucomutase	PGluM	13		Putative glucose-6-phosphate 1-epimerase-like		gi|356540771	↓(no irrigation, 17d, Starozagorski)							Phaseolus vulgaris	Zadraznik et al.,2013
					Cytosolic phosphoglucomutase		gi|12585296	↑(no irrgation, 3d)							Citrullus lanatus	Akashi et al., 2011
					Cytosolic phosphoglucomutase		gi|12585296	↑(no irrgation, 3d)							Citrullus lanatus	Akashi et al., 2011
					Phosphoglucomutase	108710731						↑(30% relative humidity, 144h)	↑(30% relative humidity, 168h)	↑(30% relative humidity, 192h)	Oryza sativa L.	Pandey et al.,2010
					Phosphoglucomutase	TC282274					↑(rewater, 25d, Excalibur)				Triticum aestivum L.	Ford et al., 2011
					Phosphoglucomutase, cytoplasmic 2	115454931		↓(30% relative water content)							Sporobolus stapﬁanus	Oliver et al.,2011
					Phosphoglucomutase∗			↑(0.21 M sorbitol, 48d)							Musa paradisiaca	Vanhove et al., 2012
					Phosphoglucomutase, putative, expressed			↓(stop irrigation 35d,481-B)							Oryza sativa L.	Raorane et al., 2015
					Phosphoglucomutase, putative, expressed			↓(stop irrigation 35d,481-B)							Oryza sativa L.	Raorane et al., 2015
					phosphoglucomutase	AT1G23190		↑(no watering, 3d)							Brassica napus	Koh et al., 2015
					phosphoglucomutase	AT1G23190			↑(no watering, 7d)	↓(no watering, 10d)	↑(no watering, 14d)				Brassica napus	Koh et al., 2015
					phosphoglucomutase	AT5G51820			↓(no watering, 7d)						Brassica napus	Koh et al., 2015
					Phosphoglucomutase	P93804		↑（withholding water, 9 d）							Zea mays	Sanggon et al., 2015
	Enolase	ENO	11		2-Phosphoglycerate dehydratase		gi|90110845	↑( PEG6000, 48h)							Triticum aestivum L.	Zhang et al.,2014
					Enolase	33113259		↑(30% relative humidity, 48h)	↑(30% relative humidity, 72h)	↑(30% relative humidity, 96h)	↑(30% relative humidity, 120h)	↑(30% relative humidity, 144h)	↑(30% relative humidity, 168h)	↑(30% relative humidity, 192h)	Oryza sativa L.	Pandey et al.,2010
					Enolase	33113259		↑(30% relative humidity, 48h)	↑(30% relative humidity, 72h)	↑(30% relative humidity, 96h)	↑(30% relative humidity, 120h)	↑(30% relative humidity, 144h)	↑(30% relative humidity, 168h)	↑(30% relative humidity, 192h)	Oryza sativa L.	Pandey et al.,2010
					Enolase	33113259		↑(30% relative humidity, 48h)	↑(30% relative humidity, 72h)		↑(30% relative humidity, 120h)	↑(30% relative humidity, 144h)	↑(30% relative humidity, 168h)	↑(30% relative humidity, 192h)	Oryza sativa L.	Pandey et al.,2010
					Enolase	TC333138				↑(drought, 24d, Excalibur)↑(drought, 24d, RAC875)	↑(rewater, 25d, Excalibur)↑(rewater, 25d, Kukri)↑(rewater, 25d, RAC875)				Triticum aestivum L.	Ford et al., 2011
					Enolase	AAS18240.1	GI:42521309	↑(10% PEG6000, 4d)							Glycine max L.	Mohammadi et al., 2012
					Enolase		gi|90110845	↑(drought, 10d)	↓(drought, 15d)						Poa pratensis L.	Xu amd Huang, 2012
					Enolase		gi|90110845	↑(drought, 10d)	↓(drought, 15d)						Poa pratensis L.	Xu amd Huang, 2012
					Enolase, putative, expressed			↑(stop irrigation 35d,481-B)							Oryza sativa L.	Raorane et al., 2015
					Enolase (2-phosphoglycerate dehydratase)			↓(25% soil water, NT)	↓(25% soil water, SAG12-ipt)						Agrostis stolonifera	Merewitz et al., 2011
					Enolase		gi|351724891	↑(no irrigation, 17d, Tiber)							Phaseolus vulgaris	Zadraznik et al.,2013
	11.3 Pentose phosphate pathway (42)
	6-Phosphogluconate dehydrogenase	G6PDH	4		6-phosphogluconate dehydrogenase, decarboxylating		gi|15225026	↓(25% soil water, NT)							Agrostis stolonifera	Merewitz et al., 2011
					6-Phosphogluconate dehydrogenase, decarboxylating (EC 1.1.1.44)	Q9FFR3				↓(no irrigation, 86d)					Populus deltoides×Populus nigra	Bonhomme et al.,2009
					Cytosolic 6-phosphogluconate dehydrogenase	19569141			↓(30% relative humidity, 72h)	↓(30% relative humidity, 96h)	↓(30% relative humidity, 120h)	↓(30% relative humidity, 144h)	↓(30% relative humidity, 168h)	↓(30% relative humidity, 192h)	Oryza sativa L.	Pandey et al.,2010
					Putative phosphogluconate dehydrogenase		gi|55295906	↓(25% soil water, NT)	↓(25% soil water, SAG12-ipt)						Agrostis stolonifera	Merewitz et al., 2011
	Ribose-5-phosphate isomerase	RPI	3		Putative ribose-5-phosphate isomerase	34393836							↑(30% relative humidity, 168h)	↑(30% relative humidity, 192h)	Oryza sativa L.	Pandey et al.,2010
					Putative ribose-5-phosphate isomerase	34393836		↑(30% relative humidity, 48h)	↑(30% relative humidity, 72h)	↑(30% relative humidity, 96h)	↑(30% relative humidity, 120h)	↑(30% relative humidity, 144h)	↑(30% relative humidity, 168h)	↑(30% relative humidity, 192h)	Oryza sativa L.	Pandey et al.,2010
					probable ribose-5-phosphate isomerase chloroplastic	AT3G04790				↓(no watering, 10d)					Brassica napus	Koh et al., 2015
	Ribulose-phosphate 3-epimerase	RPE	6		Ribulose-phosphate 3-epimerase, chloroplastic-like		gi|356511994	↓(no irrigation, 17d, Tiber)							Phaseolus vulgaris	Zadraznik et al.,2013
					Ribulose-phosphate 3-epimerase, chloroplastic-like		gi|356562858	↓(no irrigation, 17d, Starozagorski)							Phaseolus vulgaris	Zadraznik et al.,2013
					Ribulose-phosphate 3-epimerase		gi|2833386	↓(no irrigation,7d)							Medicago sativa L.	Aranjuelo et al., 2011
					Ribulose-5-phosphate-3-epimerase/Triosephosphat-isomerase			↑(not irrigation, 10d, Midnight)							Kentucky Bluegrass	Xu et al.,2010
					Ribulose-phosphate 3-epimerase, chloroplast precursor, putative, expressed			↑(stop irrigation 35d,481-B)							Oryza sativa L.	Raorane et al., 2015
					Ribulose-phosphate 3-epimerase	AT5G61410.2		↑(45–55% field capacity, Qinguan)	=						Malus domestica Borkh.	Zhou et al., 2015
	Transaldolase	TALDO	3		Putative transaldolase	57900129		↑(30% relative humidity, 48h)	↑(30% relative humidity, 72h)	↑(30% relative humidity, 96h)	↑(30% relative humidity, 120h)	↑(30% relative humidity, 144h)	↑(30% relative humidity, 168h)	↑(30% relative humidity, 192h)	Oryza sativa L.	Pandey et al.,2010
					Putative transaldolase	57900129		↑(30% relative humidity, 48h)	↑(30% relative humidity, 72h)	↑(30% relative humidity, 96h)	↑(30% relative humidity, 120h)	↑(30% relative humidity, 144h)	↑(30% relative humidity, 168h)	↑(30% relative humidity, 192h)	Oryza sativa L.	Pandey et al.,2010
					Putative transaldolase	20160725			↑(30% relative humidity, 72h)			↑(30% relative humidity, 144h)	↑(30% relative humidity, 168h)	↑(30% relative humidity, 192h)	Oryza sativa L.	Pandey et al.,2010
	Transketolase	TKT	26		Putative transaldolase	28190676		↑(30% relative humidity, 48h)	↑(30% relative humidity, 72h)	↑(30% relative humidity, 96h)	↑(30% relative humidity, 120h)	↑(30% relative humidity, 144h)	↑(30% relative humidity, 168h)	↑(30% relative humidity, 192h)	Oryza sativa L.	Pandey et al.,2010
					Putative transketolase	28190676		↑(30% relative humidity, 48h)	↑(30% relative humidity, 72h)	↑(30% relative humidity, 96h)	↑(30% relative humidity, 120h)	↑(30% relative humidity, 144h)	↑(30% relative humidity, 168h)	↑(30% relative humidity, 192h)	Oryza sativa L.	Pandey et al.,2010
					Putative transketolase 1	55296168		↓(30% relative water content)							Sporobolus stapﬁanus	Oliver et al.,2011
					Putative transketolase 1	55296168		↓(30% relative water content)							Sporobolus stapﬁanus	Oliver et al.,2011
					Putative transketolase 1	55296168		↓(30% relative water content)							Sporobolus stapﬁanus	Oliver et al.,2011
					Transaldolase 2	NP_001150674.1	gi|149099949	↑(12.5% soil water, 6d, 2023)↓(12.5% soil water, 6d, CE704)							Zea mays L.	Benesova et al. 2012
					Transketolase	TC278561		↓(drought, 5d, RAC875)		↓(drought, 24d, Excalibur)↓(drought, 24d, RAC875)	↓(rewater, 25d, Kukri)				Triticum aestivum L.	Ford et al., 2011
					Transketolase		gi|28190676	↓(drought, 10d)	↓(drought, 15d)						Poa pratensis L.	Xu amd Huang, 2012
					Transketolase, chloroplastic		gi|68052991	↓(no irrigation, 107d)							Cistus albidus	Brossa et al., 2015
					Transketolase, chloroplastic		gi|68052991	↓(no irrigation, 107d)							Cistus albidus	Brossa et al., 2015
					Transketolase, chloroplastic		gi|68052991	↓(no irrigation, 107d)							Cistus albidus	Brossa et al., 2015
					Transketolase, chloroplastic		gi|75140229	↓( PEG6000, 48h)							Triticum aestivum L.	Zhang et al.,2014
					Transketolase, chloroplastic-like		gi|356576867	↓(no irrigation, 17d, Tiber)							Phaseolus vulgaris	Zadraznik et al.,2013
					Transketolase, chloroplastic-like		gi|356576867	↓(no irrigation, 17d, Starozagorski)							Phaseolus vulgaris	Zadraznik et al.,2013
					Transketolase, chloroplastic-like		gi|356576867	↓(no irrigation, 17d, Starozagorski)							Phaseolus vulgaris	Zadraznik et al.,2013
					Transketolase, chloroplastic-like		gi|356576867	↓(no irrigation, 17d, Starozagorski)							Phaseolus vulgaris	Zadraznik et al.,2013
					Transketolase, chloroplastic-like		gi|356576867	↓(no irrigation, 17d, Starozagorski)							Phaseolus vulgaris	Zadraznik et al.,2013
					Transketolase, chloroplastic-like		gi|356536526	↓(no irrigation, 17d, Tiber)							Phaseolus vulgaris	Zadraznik et al.,2013
					Transketolase, putative		gi|255541252	↓(35% soil water, 7d)		↑(35% soil water, 21d)					Populus tremula L. × P. alba L.-clone INRA 717–1-B4 (Populus tremula L. × P. alba L.-clone INRA 717–1-B4	Bohler,et al., 2013
					Transketolase			↑(0.21 M sorbitol, 48d)							Musa paradisiaca	Vanhove et al., 2012
					Transketolase, chloroplast precursor, putative, expressed			↑(stop irrigation 35d,481-B)							Oryza sativa L.	Raorane et al., 2015
					Transketolase	AT3G60750.1		↑(45–55% field capacity, Qinguan)	↓(45–55% field capacity, Naganofuji No. 2)						Malus domestica Borkh.	Zhou et al., 2015
					transketolase	AT3G60750		↑(no watering, 3d)		↑(no watering, 10d)	↑(no watering, 14d)				Brassica napus	Koh et al., 2015
					Predicted protein H. vulgare ssp. vulgare homologus to Chloroplastic transketolase		gi|326533372	↓(10 % ﬁeld capacity, 5d, # 15141)	↓(10 % ﬁeld capacity, 5d, # 15163)						Hordeum vulgare L.	Ashoub et al., 2013
					Predicted protein H. vulgare ssp. vulgare homologus to Chloroplastic Transketolase		gi|326533372		↓(10 % ﬁeld capacity, 5d, # 15163)						Hordeum vulgare L.	Ashoub et al., 2013
					Putative transketolase	AAO33154		↓（no irrigation, 20 d）							Oryza sativa L.	Ji et al., 2012
	11.4 Tricarboxylic acid cycle (58)
	pyruvate dehydrogenase complex	DLDH	7		Dihydrolipoamide dehydrogenase		gi|9955321	↑(no irrigation,7d)							Medicago sativa L.	Aranjuelo et al., 2011
					Dihydrolipoamide dehydrogenase		gi|9955321	↑(no irrigation,7d)							Medicago sativa L.	Aranjuelo et al., 2011
					Dihydrolipoamide dehydrogenase family protein		gi|115436320	↓(50 % water lost daily, 20 d)							Upland Oryza sativa L.	Rabello et al.,2014
					Dihydrolipoamide dehydrogenase precursor	gi|13873336		↓(not irrigation, 9d, TR)↓(not irrigation, 9d, TTD)↓(not irrigation, 9d, Kn)							Triticum aestivum L.	Budak et al.,2013
					Dihydrolipoyl dehydrogenase		gi|115436320		↓(withholding irrigation, 15d, C299)						Cynodon dactylon L. Pers. ×Cynodon transvaalensis Burtt Davy, cv. Tifway,Cynodon dactylon L.	Zhao et al., 2011
					Dihydrolipoyl dehydrogenase 1, mitochondrial precursor, putative, expressed			↑(stop irrigation 35d,481-B)			Upregulated				Oryza sativa L.	Raorane et al., 2015
					dihydrolipoyl dehydrogenase mitochondrial	AT1G48030		↑(no watering, 3d)	↑(no watering, 7d)	↑(no watering, 10d)	↑(no watering, 14d)				Brassica napus	Koh et al., 2015
	Lipoamide dehydrogenase	LDH	2		Mitochondrial lipoamide dehydrogenase 1	TC279818		↓(drought, 5d, RAC875)	↓(drought, 14d, Kukri)						Triticum aestivum L.	Ford et al., 2011
					lipoamide dehydrogenase 1	AT3G16950			↓(no watering, 7d)						Brassica napus	Koh et al., 2015
	Dihydrolipoamide acetyltransferase	DLAT	2		Dihydrolipoamide acetyltransferase	AT1G34430			↑(no watering, 7d)		↓(no watering, 14d)				Brassica napus	Koh et al., 2015
					Dihydrolipoamide s-acetyltransferase	AT3G25860			↓(no watering, 7d)	↑(no watering, 10d)	↑(no watering, 14d)				Brassica napus	Koh et al., 2015
	Pyruvate dehydrogenase	PDH	1		Pyruvate dehydrogenase 2	NP_001104914			↓(25% relative humidity, 120h)						Carissa spinarum	Zhang et al.,2010
	Isocitrate dehydrogenase	IDH	3		Isocitrate dehydrogenase [NADP, chloroplastic precursor		gi|2497259	↓(25% soil water, NT)	↓(25% soil water, SAG12-ipt)						Agrostis stolonifera	Merewitz et al., 2011
					Isocitrate dehydrogenase∗			↑(0.21 M sorbitol, 48d)							Musa paradisiaca	Vanhove et al., 2012
					Isocitrate dehydrogenase (ZEAMMB73_038317)	K7V067		↑（withholding water, 9 d）							Zea mays	Sanggon et al., 2015
	Malate dehydrogenase	MDH	28		Malate dehydrogenase	TC300803			↓(drought, 14d, Kukri)		↑(rewater, 25d, Excalibur)				Triticum aestivum L.	Ford et al., 2011
					Malate dehydrogenase (NAD), mitochondrial	TC284236				↑(drought, 24d, Excalibur)					Triticum aestivum L.	Ford et al., 2011
					Malate dehydrogenase	3193222	GO:0005975				↓(15% soil water, 65d)				Quercus robur L.	Sergeant et al.,2011
					Malate dehydrogenase		gi|52851186	↑(no irrigation, 17d, Tiber)							Phaseolus vulgaris	Zadraznik et al.,2013
					Malate dehydrogenase		gi|5929964	↑(no irrigation, 17d,Tiber)↑(no irrigation, 17d, Starozagorski)							Phaseolus vulgaris	Zadraznik et al.,2013
					Malate dehydrogenase	AAS56659.1	GI:45270556	↑(10% PEG6000, 4d)	↑(drought,4d)						Glycine max L.	Mohammadi et al., 2012
					Malate dehydrogenase (EC 1.1.1.37)	O48905		↓(25% field capacity, 18d)	↓(rewater, 28d)						Populus deltoides×Populus nigra	Bonhomme et al.,2009
					Malate dehydrogenase mt	P17783		↓(dry season, 6 month)							Eucalyptus	Bedon et al., 2012
					Malate dehydrogenase mt	P17783		↓(dry season, 6 month)							Eucalyptus	Bedon et al., 2012
					mitochondiral malate dehydrogenase 1	AT1G53240		↑(no watering, 3d)	↑(no watering, 7d)	↑(no watering, 10d)	↑(no watering, 14d)				Brassica napus	Koh et al., 2015
		glyoxysomal			Malate dehydrogenase gx	Q2QLQ9		↓(dry season, 6 month)							Eucalyptus	Bedon et al., 2012
					Glyoxysomal malate dehydrogenase		gi|226508898	↑(10 % ﬁeld capacity, 5d, # 15141)							Hordeum vulgare L.	Ashoub et al., 2013
					Glyoxysomal malate dehydrogenase	gi|32251039		↓(not irrigation, 9d, TR)↓(not irrigation, 9d, TTD)↓(not irrigation, 9d, Kn)							Triticum aestivum L.	Budak et al.,2013
					peroxisomal nad-malate dehydrogenase 2	AT5G09660				↑(no watering, 10d)					Brassica napus	Koh et al., 2015
					PMDH1 (peroxisomal NAD-malate dehydrogenase 1)	TC295413									Triticum aestivum L.	Ford et al., 2011
		Cytosolic			Cytosolic malate dehydrogenase		gi|10334493	↑(no irrigation,7d)							Medicago sativa L.	Aranjuelo et al., 2011
					Cytosolic malate dehydrogenase		gi|37928995	↓(20-25% SRWC, 3d)	↓(35-40% SRWC, 2d+20-25% SRWC, 3d)	↓(35-40% SRWC, 7-9d+35-40% SRWC, 7-9d+20-25% SRWC, 8d)					Triticum aestivum L.	Wang et al., 2014
					Cytosolic malate dehydrogenase	115482534		↓(30% relative water content)							Sporobolus stapﬁanus	Oliver et al.,2011
					Cytosolic malate dehydrogenase	AAS18241.1	GI:42521311	↑(10% PEG6000, 4d)	↑(drought,4d)						Glycine max L.	Mohammadi et al., 2012
					Cytosolic malate dehydrogenase	AAS18241.1	GI:42521311	↑(drought,4d)							Glycine max L.	Mohammadi et al., 2012
					Lactate/malate dehydrogenase, putative, expressed			↓(stop irrigation 35d,481-B)			Downregulated				Oryza sativa L.	Raorane et al., 2015
					Lactate/malate dehydrogenase, putative, expressed			↓(stop irrigation 35d,481-B)			Downregulated				Oryza sativa L.	Raorane et al., 2015
					Lactate/malate dehydrogenase, putative, expressed			↑(stop irrigation 35d,481-B)			Upregulated				Oryza sativa L.	Raorane et al., 2015
		chloroplastic			Malate dehydrogenase (NADP)	P15719		↑（withholding water, 9 d）							Zea mays	Sanggon et al., 2015
		?			Malate dehydrogenase	AT1G04410			↑(no watering, 7d)	↑(no watering, 10d)					Brassica napus	Koh et al., 2015
					Malate dehydrogenase	AT3G47520			↑(no watering, 7d)	↑(no watering, 10d)					Brassica napus	Koh et al., 2015
					Malate dehydrogenase, putative [Ricinus communis]		gi|223536453		↓(withholding water, 12d)						Populus tremulaL.×P. albaL.	Durand et al.,2011
					Malate dehydrogenase, putative [Ricinus communis]		gi|223538636			↓(rewater,7d)					Populus tremulaL.×P. albaL.	Durand et al.,2011
	Aconitate hydratase	AH	7		Aconitase, putative		gi|255566397				↓(35% soil water, 28d)				Populus tremula L. × P. alba L.-clone INRA 717–1-B4 (Populus tremula L. × P. alba L.-clone INRA 717–1-B4	Bohler,et al., 2013
					Predicted protein H. vulgare ssp. vulgare homologus to Aconitase		gi|326495130	↑(10 % ﬁeld capacity, 5d, # 15141)	↑(10 % ﬁeld capacity, 5d, # 15163)						Hordeum vulgare L.	Ashoub et al., 2013
					Predicted protein H. vulgare ssp. vulgare homologus to Aconitase		gi|326495130	↑(10 % ﬁeld capacity, 5d, # 15141)							Hordeum vulgare L.	Ashoub et al., 2013
					Aconitate hydratase, cytoplasmic	Q6YZX6.1	gi|95107766	↓(12.5% soil water, 6d, 2023,sensitive)↑(12.5% soil water, 6d, CE704)							Zea mays L.	Benesova et al. 2012
					Aconitate hydratase, cytoplasmic (Aconitase)			↓(not irrigation, 10d, Brilliant,sensitive)	↑(not irrigation, 15d, Midnight)						Kentucky Bluegrass	Xu et al.,2010
					Aconitate hydratase, cytoplasmic (Aconitase)			↑(25% soil water, NT)							Agrostis stolonifera	Merewitz et al., 2011
					Putative aconitate hydratase, cytoplasmic		gi|75225211	↑(withholding irrigation, 15d, Tifway)	↑(withholding irrigation, 15d, C299)						Cynodon dactylon L. Pers. ×Cynodon transvaalensis Burtt Davy, cv. Tifway,Cynodon dactylon L.	Zhao et al., 2011
	Succinyl-CoA ligase	SCL	4		Putative succinyl-CoA ligase (GDP-forming) beta-chain, mitochondrial precursor	47847769							↑(30% relative humidity, 168h)	↑(30% relative humidity, 192h)	Oryza sativa L.	Pandey et al.,2010
					Succinyl-CoA ligase subunit alpha-2, mitochondrial precursor, putative, expressed			↓(stop irrigation 35d,481-B,tolerant)							Oryza sativa L.	Raorane et al., 2015
					Succinyl-CoA ligase beta-chain, mitochondrial precursor, putative, expressed			↓(stop irrigation 35d,481-B,tolerant)							Oryza sativa L.	Raorane et al., 2015
					Succinyl-CoA ligase (alpha-chain 2)	ACG31861.1	gi|166425148	↓(12.5% soil water, 6d, 2023)↑(12.5% soil water, 6d, CE704)							Zea mays L.	Benesova et al. 2012
	Succinate dehydrogenase	SDH	2		Succinate dehydrogenase [ubiquinone] flavoprotein subunit, mitochondrial		gi|75135397	↑(withholding irrigation, 15d, Tifway)	↑(withholding irrigation, 15d, C299)						Cynodon dactylon L. Pers. ×Cynodon transvaalensis Burtt Davy, cv. Tifway,Cynodon dactylon L.	Zhao et al., 2011
					succinate dehydrogenase 5	AT1G47420			↓(no watering, 7d)	↓(no watering, 10d)					Brassica napus	Koh et al., 2015
	Isocitrate lyase	ICL	1		Isocitrate lyase			↓(0.21 M sorbitol, 48d)							Musa paradisiaca	Vanhove et al., 2012
	2-oxoglutarate dehydrogenase	OGDH	1		2-oxoglutarate dehydrogenase e2 subunit	AT5G55070		↑(no watering, 3d)	↑(no watering, 7d)	↑(no watering, 10d)	↑(no watering, 14d)				Brassica napus	Koh et al., 2015
	11.5 Sucrose metabolism (9)
	UTP-glucose pyrophosphorylase	UGPase	3		UTP glucose 1 phosphate uridylyltransferase	Q5F1U8		↓(dry season, 6 month)							Eucalyptus	Bedon et al., 2012
					UTP-glucose-1-phosphate uridylyltransferase（UDP-glucose pyrophosphorylase）	115480571		↓(30% relative water content)							Sporobolus stapﬁanus	Oliver et al.,2011
					UTP--glucose-1-phosphate uridylyltransferase 1	AT5G17310				↓(no watering, 10d)					Brassica napus	Koh et al., 2015
	ADP-glucose pyrophosphorylase	——	1		ADP-glucose pyrophosphorylase small subunit		gi|1143500	↑(withholding irrigation, 15d, Tifway,tolerant)							Cynodon dactylon L. Pers. ×Cynodon transvaalensis Burtt Davy, cv. Tifway,Cynodon dactylon L.	Zhao et al., 2011
	Sucrose synthase	SUS	4		Sucrose synthase 1	gb|EU971052.1|	gi|116813615	↑(12.5% soil water, 6d, 2023)↑(12.5% soil water, 6d, CE704)							Zea mays L.	Benesova et al. 2012
					Sucrose synthase 2		gi|162458268	↑(12.5% soil water, 6d, 2023)↑(12.5% soil water, 6d, CE704)							Zea mays L.	Benesova et al. 2012
					Sucrose synthase		gi|3393067		↑(10 % ﬁeld capacity, 5d, # 15163)						Hordeum vulgare L.	Ashoub et al., 2013
					Sucrose synthase, putative, expressed			↑(stop irrigation 35d,481-B,tolerant)							Oryza sativa L.	Raorane et al., 2015
	Invertase	——	1		invertase		gi|951166	↓(12.5% soil water, 6d, 2023,sensitive)↑(12.5% soil water, 6d, CE704)							Zea mays L.	Benesova et al. 2012
	11.6 Starch metabolism (11)
	Starch branching enzyme	SBE	1		Starch branching enzyme IIa (Sbe2a)	gb|U65948.1|ZMU65948	gi|101383106	↓(12.5% soil water, 6d, 2023)↑(12.5% soil water, 6d, CE704)							Zea mays L.	Benesova et al. 2012
	Starch synthase	SS	1		Starch synthase IIIb-2	ref|NM_001112546.1|	gi|149087616	↓(12.5% soil water, 6d, 2023)↑(12.5% soil water, 6d, CE704)							Zea mays L.	Benesova et al. 2012
	Amylase	AMY	2		β-amylase	emb|Z25871.1|ZMBAMYL	gi|149100175	↓(12.5% soil water, 6d, 2023)↑(12.5% soil water, 6d, CE704)							Zea mays L.	Benesova et al. 2012
					Alpha amylase	288814501		↓(stop watering, 7d, B)							Hordeum vulgare L.	Wendelboe-Nelson et al., 2010
	Glucanase	——	6		Beta glucanase	gi|311764		↑(not irrigation, 9d, TTD)↑(not irrigation, 9d, Kn)							Triticum aestivum L.	Budak et al.,2013
					Beta glucanase	gi|311764		↑(not irrigation, 9d, TTD)↑(not irrigation, 9d, Kn)							Triticum aestivum L.	Budak et al.,2013
					Putative beta-1,3-glucanase		gi|115463555		↑(withholding irrigation, 15d, C299)						Cynodon dactylon L. Pers. ×Cynodon transvaalensis Burtt Davy, cv. Tifway,Cynodon dactylon L.	Zhao et al., 2011
					β-1,3-glucanase		gi|8980813	↓(not irrigation, 28d, GSE)↓(not irrigation, 28d, SSE)							Quercus ilex	Valero-Galvan et al.,2013
					endo-1,3;1,4-beta-D-glucanase	NP_001148765.1	gi|149088208	↑(12.5% soil water, 6d, 2023)↑(12.5% soil water, 6d, CE704)							Zea mays L.	Benesova et al. 2012
					endo-1,3-1,4-beta-d-glucanase-like	AT3G23600					↑(no watering, 14d)				Brassica napus	Koh et al., 2015
	acid beta-fructofuranosidase vacuolar-like	——	1		acid beta-fructofuranosidase vacuolar-like	AT1G12240		↑(no watering, 3d)			↑(no watering, 14d)				Brassica napus	Koh et al., 2015
	11.7 Other carbohydrate metabolism (10)
	Sorbitol dehydrogenase	SDH	1		Sorbitol dehydrogenase	gb|DQ191049.1|	gi|88750654	↓(12.5% soil water, 6d, 2023)↑(12.5% soil water, 6d, CE704)							Zea mays L.	Benesova et al. 2012
	Raffinose synthase	RS	1		Raffinose synthase		gi|4106395	↓(no irrgation, 3d)							Citrullus lanatus	Akashi et al., 2011
	Anthocyanidin 5,3-O-glucosyltransferase	——	1		Anthocyanidin 5,3-O-glucosyltransferase	ACG35511.1	gi|148963102	↓(12.5% soil water, 6d, 2023)↑(12.5% soil water, 6d, CE704)							Zea mays L.	Benesova et al. 2012
	Myo-inositol-1phosphate synthase	——	1		Myo-inositol-1phosphate synthase	ABC55421.1		↑(10% PEG6000, 4d)							Glycine max L.	Mohammadi et al., 2012
	glycosyl hydrolase family 38 protein	——	1		glycosyl hydrolase family 38 protein	AT3G26720				↓(no watering, 10d)					Brassica napus	Koh et al., 2015
	2-Hydroxy-3-oxopropionate reductas	——	1		2-Hydroxy-3-oxopropionate reductase	NP_001148591.1		↑(10% PEG6000, 4d)	↑(drought,4d)						Glycine max L.	Mohammadi et al., 2012
	Peroxisomal (S)-2-hydroxy-acid oxidase	——	1		Peroxisomal (S)-2-hydroxy-acid oxidase	gi|242056817		↓(not irrigation, 9d, TR)↓(not irrigation, 9d, TTD)↑(not irrigation, 9d, Kn)							Triticum aestivum L.	Budak et al.,2013
	2-phosphoglycolate phosphatase 1	——	1		2-phosphoglycolate phosphatase 1	AT5G36700			↑(no watering, 7d)	↑(no watering, 10d)	↑(no watering, 14d)				Brassica napus	Koh et al., 2015
	Orthophosphate dikinase	PPDK	2		Orthophosphate dikinase	BAA22419		↓（no irrigation, 20 d）							Oryza sativa L.	Ji et al., 2012
					Orthophosphate dikinase	BAA22419		↓（no irrigation, 20 d）							Oryza sativa L.	Ji et al., 2012
	12 Nitrogen assimilation and amino acid metabolism (95)
	Nitrite reductase	NIR	3		Predicted protein Hordeum vulgare ssp. vulgare homologous to ferredoxin-nitrite reductase precursor		gi|326505210	↓(withhold water to −2.5 Mpa soil water potential, 3 week)							Hordeum spontaneum	Ashoub et al., 2015
					Ferredoxin-nitrite reductase precursor	809514		↑(30% relative humidity, 48h)	↑(30% relative humidity, 72h)	↑(30% relative humidity, 96h)	↑(30% relative humidity, 120h)	↑(30% relative humidity, 144h)	↑(30% relative humidity, 168h)		Oryza sativa L.	Pandey et al.,2010
					ferredoxin--nitrite reductase	AT2G15620			↓(no watering, 7d)		↑(no watering, 14d)				Brassica napus	Koh et al., 2015
	Glutamine synthetase 1	GS1	8		Glutamine synthetase (EC 6.3.1.2)	P14656		↓(25% field capacity, 18d)							Populus deltoides×Populus nigra	Bonhomme et al.,2009
					Glutamine synthetase (EC 6.3.1.2)	Q9SPJ1		↓(25% field capacity, 18d)							Populus deltoides×Populus nigra	Bonhomme et al.,2009
					Glutamine synthetase cytosolic enzyme 1	P51118			↓(no irrigation 7d +rewater 7d)						Quercus ilex	Echevarrı´a-Zomen˜o et al., 2009
					Glutamine synthetase isoform GS1_2		gi|417356961	↓(withhold water to −2.5 Mpa soil water potential, 3 week)							Hordeum spontaneum	Ashoub et al., 2015
					Glutamine synthetase1 precursor		gi|162459403		↓(drought, 15d)						Poa pratensis L.	Xu amd Huang, 2012
					Cytosolic glutamine synthetase		gi|113171384				↓(35% soil water, 28d)				Populus tremula L. × P. alba L.-clone INRA 717–1-B4	Bohler,et al., 2013
					Glutamate-ammonia ligase, cytosolic (clone GS28)(glutamine synthetase shoot isozyme)	46390430			↓(30% relative humidity, 72h)	↑(30% relative humidity, 96h)	↑(30% relative humidity, 120h)	↑(30% relative humidity, 144h)			Oryza sativa L.	Pandey et al.,2010
					glutamine synthetase	AT1G66200		↓(no watering, 3d)	↑(no watering, 7d)	↑(no watering, 10d)	↑(no watering, 14d)				Brassica napus	Koh et al., 2015
	Glutamine synthetase 2	GS2	14		Glutamine synthetase 2		gi|17367236	↑(no irrigation,7d)							Medicago sativa L.	Aranjuelo et al., 2011
					Glutamine synthetase leaf isozyme cp	P15102		↓(dry season, 6 month)							Eucalyptus	Bedon et al., 2012
					Glutamine synthetase leaf isozyme, chloroplastic		gi|121353								Quercus ilex	Valero-Galvan et al.,2013
					Glutamine synthetase leaf isozyme, chloroplastic	P13564		↓(25% field capacity, 28d, Piriformospora indica-inoculated)							Hordeum vulgare L.	Ghabooli et al.,2013
					Glutamine synthetase leaf isozyme, chloroplastic	P13564		↓(25% field capacity, 28d, Piriformospora indica-inoculated)							Hordeum vulgare L.	Ghabooli et al.,2013
					Glutamine synthetase β 2, cytosolic		gi|13937041	↓(not irrigation, 28d, GSE)↓(not irrigation, 28d, SSE)							Quercus ilex	Valero-Galvan et al.,2013
					Glutamine synthase 2	TC277628				↓(drought, 24d, Excalibur)↓(drought, 24d, RAC875)	↓(rewater, 25d, Kukri)				Triticum aestivum L.	Ford et al., 2011
					Glutamine synthetase PR-2		gi|121345	↑(no irrigation, 17d,Tiber)↑(no irrigation, 17d, Starozagorski)							Phaseolus vulgaris	Zadraznik et al.,2013
					Plastid glutamine synthetase 2		gi|71362640	↑( PEG6000, 48h)							Triticum aestivum L.	Zhang et al.,2014
					Plastid glutamine synthetase isoform GS2c		gi|71362640	↑(20-25% SRWC, 3d)	—	↑(35-40% SRWC, 7-9d+35-40% SRWC, 7-9d+20-25% SRWC, 8d)					Triticum aestivum L.	Wang et al., 2014
					Plastid glutamine synthetase isoform GS2c		gi|71362640	↓(20-25% SRWC, 3d)	↓(35-40% SRWC, 2d+20-25% SRWC, 3d)	↓(35-40% SRWC, 7-9d+35-40% SRWC, 7-9d+20-25% SRWC, 8d)					Triticum aestivum L.	Wang et al., 2014
					Putative precursor chloroplastic glutamine synthetase		gi|19387272	↓(50 % water lost daily, 20 d)							Upland Oryza sativa L.	Rabello et al.,2014
					glutamine synthetase	AT5G35630				↑(no watering, 10d)	↑(no watering, 14d)				Brassica napus	Koh et al., 2015
					Glutamine synthetase	P25462		↓（withholding water, 9 d）							Zea mays	Sanggon et al., 2015
	Glutamate synthase	GOGAT	1		Ferredoxin-dependent glutamate synthase 1	TC298518		↓(drought, 5d, Excalibur)		↓(drought, 24d, Excalibur)↓(drought, 24d, RAC875)	↓(rewater, 25d, RAC875)				Triticum aestivum L.	Ford et al., 2011
	Alanine:glyxoylate aminotransferase	AGXT	3		Alanine:glyxoylate aminotransferase(AGXT)	TC324005				↓(drought, 24d, Excalibur)↓(drought, 24d, RAC875)	↑(rewater, 25d, Excalibur)				Triticum aestivum L.	Ford et al., 2011
					Alanine glyoxylate aminotransferase		gi|156712214		↑(10 % ﬁeld capacity, 5d, # 15163)						Hordeum vulgare L.	Ashoub et al., 2013
					Alanine glyoxylate aminotransferase		gi|156712214	↑(10 % ﬁeld capacity, 5d, # 15141)	↑(10 % ﬁeld capacity, 5d, # 15163)						Hordeum vulgare L.	Ashoub et al., 2013
	Acetohydroxyacid synthase (Acetolactate synthase)	AHAS/ALS	1		Acetohydroxyacid synthase		gi|258618634	↑(not irrigation, 17d, Starozagorski)							Phaseolus vulgaris	Zadraznik et al.,2013
	Alanine aminotransferase	ALAT/GPT	3		Alanine aminotransferase			↓(not irrigation, 10d, Brilliant)	↓(not irrigation, 15d, Midnight)↓(not irrigation, 15d, Brilliant)						Kentucky Bluegrass	Xu et al.,2010
					Alanine aminotransferase										Agrostis stolonifera	Merewitz et al., 2011
					Alanine aminotransferase 2	NP_001151209.1	gi|148963811	↓(12.5% soil water, 6d, 2023)↑(12.5% soil water, 6d, CE704)							Zea mays L.	Benesova et al. 2012
	Arginase	ARG	1		Arginase	O49046.1		↑(10% PEG6000, 4d)							Glycine max L.	Mohammadi et al., 2012
	Argininosuccinate synthase	ASS	2		Argininosuccinate synthase	ACG38001.1	gi|149055399	↑(12.5% soil water, 6d, 2023)↑(12.5% soil water, 6d, CE704)							Zea mays L.	Benesova et al. 2012
					argininosuccinate synthase, chloroplastic-like	AT4G24830				↓(no watering, 10d)					Brassica napus	Koh et al., 2015
	Aspartate aminotransferase	AST	8		Aspartate aminotransferase		gi|119395222	↑(withholding irrigation, 15d, Tifway,tolerant)							Cynodon dactylon L. Pers. ×Cynodon transvaalensis Burtt Davy, cv. Tifway,Cynodon dactylon L.	Zhao et al., 2011
					Aspartate aminotransferase		gi|20601		↑(withholding irrigation, 15d, C299)						Cynodon dactylon L. Pers. ×Cynodon transvaalensis Burtt Davy, cv. Tifway,Cynodon dactylon L.	Zhao et al., 2011
					Aspartate aminotransferase			↓(not irrigation, 10d, Brilliant)	↓(not irrigation, 15d, Midnight)↓(not irrigation, 15d, Brilliant)						Kentucky Bluegrass	Xu et al.,2010
					Aspartate aminotransferase										Agrostis stolonifera	Merewitz et al., 2011
					Aspartate aminotransferase P2, mitochondrial	P26563		↑(25% field capacity, 28d, non-inoculated)							Hordeum vulgare L.	Ghabooli et al.,2013
					Chloroplast aspartate aminotransferase	ACG59771a		↑(1/3 of field capacity, 14h, Wild)							Triticum aestivum L.	Peremarti et al.,2014
					Possible: Aspartate aminotransferase		gi|59932915		↓(25% soil water, SAG12-ipt)						Agrostis stolonifera	Merewitz et al., 2011
					Aspartate aminotransferase	B6T9J4		↑（withholding water, 9 d）							Zea mays	Sanggon et al., 2015
	Cysteine synthase	CS	13		Cysteine synthase	TC277896		↓(drought, 5d, RAC875)	↓(drought, 14d, Kukri)	↑(drought, 24d, Excalibur)↑(drought, 24d, RAC875)					Triticum aestivum L.	Ford et al., 2011
					Cysteine synthase	4574134		↓(30% relative humidity, 48h)	↓(30% relative humidity, 72h)		↓(30% relative humidity, 120h)	↓(30% relative humidity, 144h)	↓(30% relative humidity, 168h)	↓(30% relative humidity, 192h)	Oryza sativa L.	Pandey et al.,2010
					Cysteine synthase		gi|585032	↓(20-25% SRWC, 3d)	↓(35-40% SRWC, 2d+20-25% SRWC, 3d)	↓(35-40% SRWC, 7-9d+35-40% SRWC, 7-9d+20-25% SRWC, 8d)					Triticum aestivum L.	Wang et al., 2014
					Cysteine synthase		gi|585032	↓(20-25% SRWC, 3d)	↓(35-40% SRWC, 2d+20-25% SRWC, 3d)	↓(35-40% SRWC, 7-9d+35-40% SRWC, 7-9d+20-25% SRWC, 8d)					Triticum aestivum L.	Wang et al., 2014
					Cysteine synthase		gi|585032	↓(20-25% SRWC, 3d)	↓(35-40% SRWC, 2d+20-25% SRWC, 3d)	↓(35-40% SRWC, 7-9d+35-40% SRWC, 7-9d+20-25% SRWC, 8d)					Triticum aestivum L.	Wang et al., 2014
					Cysteine synthase	NP_001105469.1	gi|149088592	↓(12.5% soil water, 6d, 2023)↑(12.5% soil water, 6d, CE704)							Zea mays L.	Benesova et al. 2012
					Putative plastidic cysteine synthase 1	TC299795		↓(drought, 5d, RAC875)							Triticum aestivum L.	Ford et al., 2011
					Cysteine synthase-like		gi|356573072	↑(no irrigation, 17d, Starozagorski)							Phaseolus vulgaris	Zadraznik et al.,2013
					O-acetylserine (thiol)lyase		gi|34099833	↓(withholding water, 8d)							Populus tremulaL.×P. albaL.	Durand et al.,2011
					o-acetylserine lyase (oas-tl) isoform oasb	AT2G43750		↓(no watering, 3d)		↓(no watering, 10d)	↑(no watering, 14d)				Brassica napus	Koh et al., 2015
					o-acetylserine lyase (oas-tl) isoform oasb	AT2G43750			↑(no watering, 7d)	↑(no watering, 10d)					Brassica napus	Koh et al., 2015
					Cysteine synthase			↑(0.21 M sorbitol, 48d)							Musa paradisiaca	Vanhove et al., 2012
					Cysteine synthase		gi|4574135	↑(50 % water lost daily, 20 d)							Upland Oryza sativa L.	Rabello et al.,2014
	Lysine decarboxylase	LDC	1		Lysine decarboxylase-like	NP_001152209.1	gi|113701642	↓(12.5% soil water, 6d, 2023)↑(12.5% soil water, 6d, CE704)							Zea mays L.	Benesova et al. 2012
	S-adenosylmethionine synthase	SAMS	13		S-adenosyl methionine synthetase 2	Q96552		↓(dry season, 6 month)							Eucalyptus	Bedon et al., 2012
					S-adenosyl-L-homocysteine hydrolase			↑(0.21 M sorbitol, 48d)							Musa paradisiaca	Vanhove et al., 2012
					S-adenosyl-L-methionine synthetase	gi|		↑(not irrigation, 28d, GSE)↑(not irrigation, 28d, SSE)							Quercus ilex	Valero-Galvan et al.,2013
					S-adenosylmethionine synthase 3	TC286758			↑(drought, 14d, Excalibur)↑(drought, 14d, Kukri)↑(drought, 14d, RAC875)						Triticum aestivum L.	Ford et al., 2011
					S-adenosylmethionine synthetase		gi|3024122	↓(no irrgation, 3d)							Citrullus lanatus	Akashi et al., 2011
					S-adenosylmethionine synthetase		gi|13540318	↓(no irrgation, 3d)							Citrullus lanatus	Akashi et al., 2011
					S-adenosylmethionine synthetase			↓(0.21 M sorbitol, 48d)							Musa paradisiaca	Vanhove et al., 2012
					S-adenosylmethionine synthetase, putative		gi|255548295	↑(35% soil water, 7d)		↓(35% soil water, 21d)					Populus tremula L. × P. alba L.-clone INRA 717–1-B4	Bohler,et al., 2013
					S-adenosylmethionine synthetase		gi|3914019	↓(25% soil water, NT)							Agrostis stolonifera	Merewitz et al., 2011
					S-adenosylmethionine synthase 2		gi|122220778	↑(withhold water to −2.5 Mpa soil water potential, 3 week)							Hordeum spontaneum	Ashoub et al., 2015
					S-adenosylmethionine synthase 3		gi|122220777	↑(withhold water to −2.5 Mpa soil water potential, 3 week)							Hordeum spontaneum	Ashoub et al., 2015
					s-adenosylmethionine synthetase	AT3G17390		↑(no watering, 3d)	↓(no watering, 7d)	↓(no watering, 10d)					Brassica napus	Koh et al., 2015
					S-adenosylmethionine:2-demethylmenaquinone methyltransferase-like	75134135			↑(30% relative humidity, 72h)	↑(30% relative humidity, 96h)	↑(30% relative humidity, 120h)	↑(30% relative humidity, 144h)	↑(30% relative humidity, 168h)	↑(30% relative humidity, 192h)	Oryza sativa L.	Pandey et al.,2010
	Methionine synthase	MS	14		Methionine synthase	50897038		↑(stop watering, 7d, GP)↑(stop watering, 7d, B)							Hordeum vulgare L.	Wendelboe-Nelson et al., 2010
					Methionine synthase	AAL33589.1	gi|148941572	↑(12.5% soil water, 6d, 2023)↑(12.5% soil water, 6d, CE704)							Zea mays L.	Benesova et al. 2012
					Methionine synthase		gi|50897038	↑(withhold water to −2.5 Mpa soil water potential, 3 week)							Hordeum spontaneum	Ashoub et al., 2015
					Methionine synthase		gi|50897038	↑(10 % ﬁeld capacity, 5d, # 15141)	↑(10 % ﬁeld capacity, 5d, # 15163)						Hordeum vulgare L.	Ashoub et al., 2013
					Methionine synthase		gi|50897038	↑(10 % ﬁeld capacity, 5d, # 15141)	↑(10 % ﬁeld capacity, 5d, # 15163)						Hordeum vulgare L.	Ashoub et al., 2013
					Methionine synthase		gi|50897038	↑(10 % ﬁeld capacity, 5d, # 15141)	↑(10 % ﬁeld capacity, 5d, # 15163)						Hordeum vulgare L.	Ashoub et al., 2013
					Methionine synthase		gi|50897038	↑(10 % ﬁeld capacity, 5d, # 15141)	↑(10 % ﬁeld capacity, 5d, # 15163)						Hordeum vulgare L.	Ashoub et al., 2013
					Methionine synthase			↓(25% soil water, NT)							Agrostis stolonifera	Merewitz et al., 2011
					Methionine synthase			↓(25% soil water, NT)	↑(25% soil water, SAG12-ipt)						Agrostis stolonifera	Merewitz et al., 2011
					Methionine synthase	AAQ08403.1	GI:33325957	↓(drought,4d)							Glycine max L.	Mohammadi et al., 2012
					Methionine synthase protein		gi|18483235	↑(withholding irrigation, 15d, Tifway)							Cynodon dactylon L. Pers. ×Cynodon transvaalensis Burtt Davy, cv. Tifway,Cynodon dactylon L.	Zhao et al., 2011
					Methionine synthase∗			↓(0.21 M sorbitol, 48d)							Musa paradisiaca	Vanhove et al., 2012
					Ethylene-responsive methionine synthase	115489654		↓(30% relative water content)							Sporobolus stapﬁanus	Oliver et al.,2011
					Ethylene-responsive methionine synthase	115489654		↓(30% relative water content)							Sporobolus stapﬁanus	Oliver et al.,2011
	Adenosylhomocysteinase	SAHase/AdoHcyase	1		Adenosylhomocysteinase (S-adenosyl-L-homocysteine hydrolase)(AdoHcyase)	77550703			↑(30% relative humidity, 72h)	↑(30% relative humidity, 96h)	↑(30% relative humidity, 120h)	↑(30% relative humidity, 144h)	↑(30% relative humidity, 168h)	↑(30% relative humidity, 192h)	Oryza sativa L.	Pandey et al.,2010
	5-methyltetrahydropteroyltriglutamate-homocysteine methyltransferase	MetE	6		5-methyltetrahydropteroyltriglutamate-homocysteine methyltransferase,putative,expressed	77556631		↓(30% relative humidity, 48h)	↓(30% relative humidity, 72h)	↓(30% relative humidity, 96h)	↓(30% relative humidity, 120h)	↓(30% relative humidity, 144h)	↓(30% relative humidity, 168h)	↓(30% relative humidity, 192h)	Oryza sativa L.	Pandey et al.,2010
					5-methyltetrahydropteroyltriglutamate-homocysteine methyltransferase,putative,expressed	77556632			↑(30% relative humidity, 72h)	↑(30% relative humidity, 96h)	↑(30% relative humidity, 120h)	↑(30% relative humidity, 144h)		↑(30% relative humidity, 192h)	Oryza sativa L.	Pandey et al.,2010
					5-methyltetrahydropteroyltriglutamate-homocysteine methyltransferase,putative,expressed	77556631		↑(30% relative humidity, 48h)	↑(30% relative humidity, 72h)	↑(30% relative humidity, 96h)	↑(30% relative humidity, 120h)	↑(30% relative humidity, 144h)		↑(30% relative humidity, 192h)	Oryza sativa L.	Pandey et al.,2010
					5-methyltetrahydropteroyltriglutamate-homocysteine methyltransferase,putative,expressed	77556632		↑(30% relative humidity, 48h)	↑(30% relative humidity, 72h)	↑(30% relative humidity, 96h)	↑(30% relative humidity, 120h)	↑(30% relative humidity, 144h)	↑(30% relative humidity, 168h)	↑(30% relative humidity, 192h)	Oryza sativa L.	Pandey et al.,2010
					5-Methyltetrahydropteroyltriglutamate-homocysteinemethyltransferase 4.45/87 9/1	P93263		↑(25% field capacity, 28d, Piriformospora indica-inoculated)							Hordeum vulgare L.	Ghabooli et al.,2013
					5-methyltetrahydropteroyltriglutamate--homocysteine methyltransferase 2	AT3G03780			↓(no watering, 7d)						Brassica napus	Koh et al., 2015
	L,L-diaminopimelate aminotransferase	——	1		ll-diaminopimelate chloroplastic	AT4G33680				↓(no watering, 10d)	↑(no watering, 14d)				Brassica napus	Koh et al., 2015
	homoserine kinase	HK	1		homoserine kinase	AT2G17265			↓(no watering, 7d)		↓(no watering, 14d)				Brassica napus	Koh et al., 2015
	n-acetyl-gamma-glutamyl-phosphate reductase	——	1		probable n-acetyl-gamma-glutamyl-phosphate reductase	AT2G19940		↑(no watering, 3d)	↓(no watering, 7d)	↓(no watering, 10d)					Brassica napus	Koh et al., 2015
	13 Fatty acid metabolism (13)
	Thiolase I	ACAA	2		3-ketoacyl-CoA thiolase 2 (peroxisomal)	NP_001241698.1	gi|91874450	↓(12.5% soil water, 6d, 2023)↑(12.5% soil water, 6d, CE704)							Zea mays L.	Benesova et al. 2012
					Peroxisomal 3-ketoacyl-CoA thiolase 3	TC363427				↑(drought, 24d, Excalibur)↑(drought, 24d, Kukri)	↑(rewater, 25d, Excalibur)↑(rewater, 25d, Kukri)↑(rewater, 25d, RAC875)				Triticum aestivum L.	Ford et al., 2011
	Thiolase II	ACAT	1		Acetyl-CoA acetyltransferase 1 (cytosolic)	NP_001148667.1	gi|149017000	↑(12.5% soil water, 6d, 2023)↑(12.5% soil water, 6d, CE704)							Zea mays L.	Benesova et al. 2012
	Acetyl-coenzyme A carboxylase carboxyl transferase	ACCCT	2		Acetyl-coenzyme A carboxylase carboxyl transferase subunit beta			↑(35% RWC)							Gossypium herbaceum L.	Deeba et al., 2012
					Acetyl-coenzyme A carboxylase carboxyl transferase subunit alpha, chloroplastic	AT2G38040			↓(no watering, 7d)		↑(no watering, 14d)				Brassica napus	Koh et al., 2015
	Acyl carrier protein	ACP	1		Acyl carrier protein 1, chloroplastic	P02902		↓(25% field capacity, 28d, non-inoculated)↓(25% field capacity, 28d, Piriformospora indica-inoculated)							Hordeum vulgare L.	Ghabooli et al.,2013
[truncated: 469 more rows]

## Sheet: Table S2
	Table S2. List of drought-responsive phosphoproteins in plants reported in four publications.
	Function and name of unique proteins/protein familiesa	Abbreviation	Accession	Protein names in original research articles	Modified sequence	Phosphosite	Changes pattern of phosphorylation level		Plant species	References
	01 Signaling
	GTP-binding protein	—		Ras-related protein Rab7/GTPase-activating protein AGD6	EEFLIQASPS(ph)DPDNFPFVLLGNK (HX10)/FQS(ph)LGVAFYR (NC47)	S162 (HX10)/S121 (NC47)	↓(20% PEG, 48 h, HX10, tolerant)	(−)(20% PEG, 48 h, NC47)	Triticum aestivum	Zhang et al., 2014
			A3KLI0	RAB17 protein	sGsSSSSSSEDDGmGGR	S(2): 100.0	↓(PEG −0.7MPa, 8h)		Zea mays	Hu et al., 2015
			B6T8F4	RAN-binding protein 1	sEASEEEDASAAAAAGEEEDTGAQVAPIVR	S(3): 93.9; S(10): 100.0	↓(PEG −0.7MPa, 8h)		Zea mays	Hu et al., 2015
	Serine/threonine-protein kinase	STK	tr|B6T6P6|B6T6P6_MAIZE	Serine/threonine-protein kinase SAPK10		S173	↑(withholding water,1d)	↑(withholding water,4-5 d)	Zea mays	Bonhomme et al., 2012
			GRMZM2G451132_P01	Serine/threonine-protein kinase ctr1		T433		↑(withholding water,4-5 d)	Zea mays	Bonhomme et al., 2012
				Serine/threonine-protein kinase CTR1	DIS(ph)YSDLAAR (HX10)/AALEES(ph)EKPVEVQPDAR (NC47)	S57 (HX10)/S749 (NC47)	(–)(20% PEG, 48 h, HX10)	↓(20% PEG, 48 h, NC47)	Triticum aestivum	Zhang et al., 2014
			B6SVK8	Protein serine threonine kinase	aAQGSLDsPTGGG	S(17): 99.9	↑(PEG −0.7MPa, 8h)		Zea mays	Hu et al., 2015
			K7TZQ1	Serinethreonine-proteinkinase wnk4-like	qYPAsAGsSPSR	T(20): 77.5	↓(PEG −0.7MPa, 8h)		Zea mays	Hu et al., 2015
				Serine/threonine-protein kinase HT1	QQS(ph)IHPPPAFGS(ph)STNLEALALEASK (HX10)/SLGGFFS(ph)SLR (NC47)	S67 (HX10)/S553 (NC47)	(+)(20% PEG, 48 h, HX10)	(+)(20% PEG, 48 h, NC47)	Triticum aestivum	Zhang et al., 2014
				Serine/threonine-protein kinase PRP4-like protein	S(ph)ADMFCDDIFGES(ph)PAGFR (HX10)/GSESVGIFS(ph)GDEDNNGK (NC47)	S479 (HX10)/S56 (NC47)	↑(20% PEG, 48 h, HX10)	(−)(20% PEG, 48 h, NC47)	Triticum aestivum	Zhang et al., 2014
	Serine/threonine-protein phosphatase	PSP	tr|C0PIZ1|C0PIZ1_MAIZE	Serine/threonine-protein phosphatase		T169		(-)(withholding water,4-5 d)	Zea mays	Bonhomme et al., 2012
	Protein phosphatase 2c	PP2C	C4JAN4	Protein phosphatase 2c family protein	sIsAEGLR	Y(3): 33.3; T(4): 33.3; S(5): 33.3	↓(PEG −0.7MPa, 8h)		Zea mays	Hu et al., 2015
			K7U9T7	Protein phosphatase 2c and cyclic nucleotide-binding kinase domain-containing isoform x1	vTLQPSQQVVGLAGPEsPLIVSSNTNNQR	S(11): 100.0	↓(PEG −0.7MPa, 8h)		Zea mays	Hu et al., 2015
			C4J1A8	Probable protein phosphatase 2c 31-like	eQSSPTSNLsPR	S(13): 76.0	↑(PEG −0.7MPa, 8h)		Zea mays	Hu et al., 2015
			C4J1A8	Probable protein phosphatase 2c 30-like	eQSsPTSNLsPR	S(6): 77.1	↑(PEG −0.7MPa, 8h)		Zea mays	Hu et al., 2015
				Putative protein phosphatase 2C 70	KPTDSAATSSSEQSPVT(ph)PTK (HX10)/FTGM(ox)LESIIWS(ph)PK (NC47)	T385 (HX10)/s131 (NC47)	↑(20% PEG, 48 h, HX10)	(+)(20% PEG, 48 h, NC47)	Triticum aestivum	Zhang et al., 2014
	Phospholipase		B4FY17	Phospholipase	csGSGNIAELPDQGsLR	S(3): 100.0	↓(PEG −0.7MPa, 8h)		Zea mays	Hu et al., 2015
	Calcium-dependent protein kinase	CDPK	C4J038	Calcium-dependent protein kinase	aTAPDsGR	S(1):100.0;S(4):94.4;T(5):94.4;T(13):99.8	↓(PEG −0.7MPa, 8h)		Zea mays	Hu et al., 2015
				Calcium-dependent protein kinase	S(ph)AGLLVGSVLK (HX10)/S(ph)AGLLVGSVLK (NC47)	S1 (HX10)/S1 (NC47)	(–)(20% PEG, 48 h, HX10)	↓(20% PEG, 48 h, NC47)	Triticum aestivum	Zhang et al., 2014
	Calmodulin-related protein	—	GRMZM2G097900_P01	Calmodulin-related protein 2, touch-induced		S66		↑(withholding water,4-5 d)	Zea mays	Bonhomme et al., 2012
	Calmodulin binding protein	CAM	GRMZM2G406674_P02	Calmodulin binding protein		S345	↑(withholding water,1d)	↑(withholding water,4-5 d)	Zea mays	Bonhomme et al., 2012
	Calmodulin-binding family protein	CaB	B8A0K2	Calmodulin-binding family protein	tLsGGLQsPR	S(1):97.9;S(4):2.2;T(5):99.9	↓(PEG −0.7MPa, 8h)		Zea mays	Hu et al., 2015
	Naringenin, 2-oxoglutarate 3-dioxygenase	—	GRMZM2G702514_P01	Naringenin,2-oxoglutarate 3-dioxygenase		S17	↑(withholding water,1d)	↑(withholding water,4-5 d)	Zea mays	Bonhomme et al., 2012
	Ninja-family protein	—	sp|B6TNQ7|U7376_MAIZE	Ninja-family protein 6		S83	↑(withholding water,1d)	↑(withholding water,4-5 d)	Zea mays	Bonhomme et al., 2012
			GRMZM2G438290_P01	Ninja-family protein 5		S105		↑(withholding water,4-5 d)	Zea mays	Bonhomme et al., 2012
	MDR-like ABC transporter	—	GRMZM2G125424_P01	MDR-like ABC transporter		S382		↓(withholding water,4-5 d)	Zea mays	Bonhomme et al., 2012
			GRMZM2G085236_P02	MDR-like ABC transporter		S541		↓(withholding water,4-5 d)	Zea mays	Bonhomme et al., 2012
	Protein phosphatase inhibitor 2 containing protein	—	tr|B6SQ98|B6SQ98_MAIZE	Protein phosphatase inhibitor 2 containing protein		S5		↓(withholding water,4-5 d)	Zea mays	Bonhomme et al., 2012
	Sucrose non-fermenting1-related protein kinase	SnRK	GRMZM2G110922_P04	SnRK2.4		S158		↑(withholding water,4-5 d)	Zea mays	Bonhomme et al., 2012
	Auxin-repressed protein	—	GRMZM2G099049_P02	Auxin-repressed protein		S29/S31		↑(withholding water,4-5 d)	Zea mays	Bonhomme et al., 2012
			GRMZM2G099049_P02	Auxin-repressed protein		T118		↑(withholding water,4-5 d)	Zea mays	Bonhomme et al., 2012
			tr|B4FQ41|B4FQ41_MAIZE	Auxin-repressed 12.5 kDa protein		S59/S60/S61/T66		↑(withholding water,4-5 d)	Zea mays	Bonhomme et al., 2012
	Calmodulin-related protein touch-induced	—	B6TV01	Calmodulin-related protein touch-induced	isPSELAAVSR	S(3):100.0;S(8):100.0	↑(PEG −0.7MPa, 8h)		Zea mays	Hu et al., 2015
	Protein kinase super family protein	—	B4FGQ4	Protein kinase super family protein	tSSTsDSGR	S(11): 99.9	↓(PEG −0.7MPa, 8h)		Zea mays	Hu et al., 2015
			K7UF98	Protein kinase superfamily protein	gAVAPAVDPsSPSSR	S(4): 100.0;	↑(PEG −0.7MPa, 8h)		Zea mays	Hu et al., 2015
			K7W2Z7	Protein kinase superfamily protein	rPsYSLsQNQNQAPPAAR	S(3): 100.0	↑(PEG −0.7MPa, 8h)		Zea mays	Hu et al., 2015
			GRMZM2G016939_P03	Protein kinase G11A		S665	↓(withholding water,1d)	↑(withholding water,4-5 d)	Zea mays	Bonhomme et al., 2012
			tr|C4J107|C4J107_MAIZE	Map3k delta-1 protein kinase, putative		T326	(-)(withholding water,1d)	↓(withholding water,4-5 d)	Zea mays	Bonhomme et al., 2012
			GRMZM2G413544_P01	Putative Ste-20 related kinase, 3'-partial		S351		↑(withholding water,4-5 d)	Zea mays	Bonhomme et al., 2012
			B6SS20	TPA: phototropin family protein kinase	gRDsGVGSTR	S(4):100.0	↑(PEG −0.7MPa, 8h)		Zea mays	Hu et al., 2015
			C0PND4	Receptor-like protein kinase herk 1-like	vSsLDISSTDQSR	S(4): 100.0	↑(PEG −0.7MPa, 8h)		Zea mays	Hu et al., 2015
			GRMZM2G011070_P01	Salt-inducible protein kinase		S431		↑(withholding water,4-5 d)	Zea mays	Bonhomme et al., 2012
			GRMZM2G066274_P01	Receptor-like kinase RHG1		S753		↑(withholding water,4-5 d)	Zea mays	Bonhomme et al., 2012
				Casein kinase I isoform delta-like protein	S(ph)LELLSLGTGK (HX10)/VSGAAGPS(ph)IEK (NC47)	S461 (HX10)/S317 (NC47)	(+)(20% PEG, 48 h, HX10)	(−)(20% PEG, 48 h, NC47)	Triticum aestivum	Zhang et al., 2014
			tr|B4FI84|B4FI84_MAIZE	GCK-like kinase MIK		S204		↓(withholding water,4-5 d)	Zea mays	Bonhomme et al., 2012
	Leucine-rich repeat receptor-like protein kinase family protein	—	B7ZYR5	TPA: leucine-rich repeat receptor-like protein kinase family protein	eDLGGGASGsAAAVAAAAAGGAAGEQSR	S(2): 100.0; T(5): 99.9	↑(PEG −0.7MPa, 8h)		Zea mays	Hu et al., 2015
	RAC ATPase activating protein 1	—	B6SWP2	RAC gtpase activating protein 1	yLANADSDVLQGsGSPER	T(3): 99.9	↓(PEG −0.7MPa, 8h)		Zea mays	Hu et al., 2015
			A3KLI0	RAB17 protein	sGsSSSSSSEDDGMGGR	S(13): 82.7	↓(PEG −0.7MPa, 8h)		Zea mays	Hu et al., 2015
	Probable ADP-ribosylationfactor ATPase-activating protein agd14-like	—	B6U114	Probableadp-ribosylationfactor gtpase-activating protein agd14-like	tISSASsIGsAEGTSEQTk	S(8): 99.7	↓(PEG −0.7MPa, 8h)		Zea mays	Hu et al., 2015
	Lipid phosphate phosphatase 3	—	B6SSC1	Lipid phosphate phosphatase 3	dtSPILESMEsGR	S(3): 100.0	↑(PEG −0.7MPa, 8h)		Zea mays	Hu et al., 2015
	Integrin-linked proteinkinase family protein	—	C0HIM6	Integrin-linkedproteinkinase family protein	qLssGAAR	S(6): 99.8	↑(PEG −0.7MPa, 8h)		Zea mays	Hu et al., 2015
	Hypothetical protein ZEAMMB73_520864	—	K7UDL1	Hypothetical protein ZEAMMB73_520864	sEVNDEDDEEGsEEDEDDDE	S(6): 100.0	↑(PEG −0.7MPa, 8h)		Zea mays	Hu et al., 2015
	OSJNBb0039L24.13 protein	—	trm|Q7XMK5	OSJNBb0039L24.13 protein			↓(withholding water, 6 d)		Oryza sativa L.	Ke et al., 2009
	Basic region leucine zipper protein	—		Basic region leucine zipper protein	DFSS(ph)MNMDELLR (HX10)/DFSS(ph)M(ox)NMDELLR (NC47)	S57 (HX10)/S57 (NC47)	↑(20% PEG, 48 h, HX10)	↑(20% PEG, 48 h, NC47)	Triticum aestivum	Zhang et al., 2014
	02 Stress and denfense
	Water-stress protein		AC217556.3_FGP003	Water-stress protein		T328	↑(withholding water,1d)	↓(withholding water,4-5 d)	Zea mays	Bonhomme et al., 2012
	Dehydrin	DHN	tr|B6SS21|B6SS21_MAIZE	Dehydrin COR410		T194		↑(withholding water,4-5 d)	Zea mays	Bonhomme et al., 2012
			tr|A7RDP0|A7RDP0_MAIZE	Lea2		S78		(+)(withholding water,4-5 d)	Zea mays	Bonhomme et al., 2012
	DnaJ protein		tr|B8A362|B8A362_MAIZE	DnaJ protein		T377		↓(withholding water,4-5 d)	Zea mays	Bonhomme et al., 2012
	Disease resistance protein rpp13	DRP	K7UQX6	Disease resistance protein rpp13	vLtcRMyDLVHDFIVsk	S(14):100.0	↑(PEG −0.7MPa, 8h)		Zea mays	Hu et al., 2015
	Germin-like protein 1		trm|O49001	Germin-like protein 1			↓(withholding water, 6 d)		Oryza sativa L.	Ke et al., 2009
	Cold acclimation protein WCOR615, partial			Cold acclimation protein WCOR615, partial	AAS(ph)DTADAAMK (HX10)/AAS(ph)DTADAAMK (NC47)	S50 (HX10)/S50 (NC47)	↑(20% PEG, 48 h, HX10)	↑(20% PEG, 48 h, NC47)	Triticum aestivum	Zhang et al., 2014
	WALI7			WALI7	VGS(ph)ATNWAATWDEAAI (HX10)/VGS(ph)ATNWAATWDEAAI (NC47)	S251 (HX10)/S251 (NC47)	↑(20% PEG, 48 h, HX10)	↑(20% PEG, 48 h, NC47)	Triticum aestivum	Zhang et al., 2014
					VDAFTKINS(ph)MPR (NC47)	s226 (NC47)		↑(20% PEG, 48 h, NC47)	Triticum aestivum	Zhang et al., 2014
	NIPA-like protein			NIPA-like protein	NLEEGGS(ph)TADKPQDGVR (HX10)/WLPNVQDCEENSTHS(ph)AK (NC47)	S506 (HX10)/S307 (NC47)	↑(20% PEG, 48 h, HX10)	↓(20% PEG, 48 h, NC47)	Triticum aestivum	Zhang et al., 2014
	03 Transcription related
	Ribonuclease	RNase	trm|Q8RYA7	Drought-induced S-like ribonuclease			↑(withholding water, 6 d)		Oryza sativa L.	Ke et al., 2009
	GIF2		tr|A5HEH4|A5HEH4_MAIZE	GIF2		S212		↓(withholding water,4-5 d)	Zea mays	Bonhomme et al., 2012
	DNL zinc finger family protein		GRMZM2G132636_P01	DNL zinc finger family protein		T12, S21		↑(withholding water,4-5 d)	Zea mays	Bonhomme et al., 2012
	COP1-interacting protein 7 (CIP7)-like protein		GRMZM2G077596_P01	COP1-interacting protein 7 (CIP7)-like protein		S855		↑(withholding water,4-5 d)	Zea mays	Bonhomme et al., 2012
	Transcription factor	TF	tr|B6UHC7|B6UHC7_MAIZE	Transcription factor HY5		S43	↓(withholding water,1d)	↓(withholding water,4-5 d)	Zea mays	Bonhomme et al., 2012
			F1DJV0	Bzip transcription factor superfamily protein	nNLTEGGAEsDEEIR	S(10):100.0;T(11):100.0	↓(PEG −0.7MPa, 8h)		Zea mays	Hu et al., 2015
			K7VQH0	Bzip transcription factor superfamily protein	eGGVEsDEEIR	S(3):100.0	↑(PEG −0.7MPa, 8h)		Zea mays	Hu et al., 2015
			Q84UX7	Global transcription factor group e	vDDEEDDEQcsLH	S(5):75.6	↓(PEG −0.7MPa, 8h)		Zea mays	Hu et al., 2015
			B6TI42	At-hook protein 1	aPNTAPSAsPDGAk	S(10):100.0	↑(PEG −0.7MPa, 8h)		Zea mays	Hu et al., 2015
	Protein TIME FOR COFFEE		GRMZM2G360517_P03	Protein TIME FOR COFFEE		S1329		↓(withholding water,4-5 d)	Zea mays	Bonhomme et al., 2012
			GRMZM2G360517_P03	Protein TIME FOR COFFEE		S1341		↓(withholding water,4-5 d)	Zea mays	Bonhomme et al., 2012
	RNA helicase	Hlc	GRMZM2G403636_P01	DEAD-box ATP-dependent RNA helicase 52C		T71/S76	↓(withholding water,1d)	↑(withholding water,4-5 d)	Zea mays	Bonhomme et al., 2012
	BZIP transcriptional activator RSG, putative, expressed		tr|C0PBN0|C0PBN0_MAIZE	BZIP transcriptional activator RSG, putative, expressed		S130		↑(withholding water,4-5 d)	Zea mays	Bonhomme et al., 2012
	RING finger protein 126		tr|B6T559|B6T559_MAIZE	RING finger protein 126		S93/S100	(-)(withholding water,1d)		Zea mays	Bonhomme et al., 2012
	Zinc finger ccch domain-containing protein		B4FI93	Zinc finger ccch domain-containing protein 19-like	qNsGNER	S(2): 80.0; S(16): 80.0	↑(PEG −0.7MPa, 8h)		Zea mays	Hu et al., 2015
			B4FBA9	Zinc finger c-x8-c-x5-c-x3-h type family protein	gANEEVsSINVDEDPNVPYER	S(3): 96.3; S(11): 100.0	↓(PEG −0.7MPa, 8h)		Zea mays	Hu et al., 2015
			K7UHH6	Zinc finger c-x8-c-x5-c-x3-h type family protein	vGDYDDEGNIVsSSNIFADR	S(4): 100.0	↓(PEG −0.7MPa, 8h)		Zea mays	Hu et al., 2015
	ZF-HD homeobox protein		B4FQM0	ZF-HD homeobox protein	vQPSTASGGsPQsS	S(9): 100.0	↑(PEG −0.7MPa, 8h)		Zea mays	Hu et al., 2015
	Heterogeneous nuclear ribonucleoprotein	RNP	B7ZZU5	TPA: heterogeneous nuclear ribonucleoprotein r	dDTGsSPTAk	S(8): 99.7	↓(PEG −0.7MPa, 8h)		Zea mays	Hu et al., 2015
			K7UBY5	Heterogeneous nuclear ribonucleoprotein r-like	gsRDDSEEPEEDDDNDER	Y(14): 99.5	↑(PEG −0.7MPa, 8h)		Zea mays	Hu et al., 2015
	SSXT protein		B6UHZ8	SSXT protein	sTGGDDGGsD	S(21): 78.8	↑(PEG −0.7MPa, 8h)		Zea mays	Hu et al., 2015
	SPF1-like DNA-binding protein		B7ZZ27	SPF1-like DNA-binding protein	dGNSSAFDQNEQSNDTTSGLsGAk	S(6): 93.5	↑(PEG −0.7MPa, 8h)		Zea mays	Hu et al., 2015
	RNA-binding protein	RBP	B4FBM8	RNA-binding protein 39-like isoform x2	nLVQsNATSGGAASGGAR	S(21): 80.0	↓(PEG −0.7MPa, 8h)		Zea mays	Hu et al., 2015
			tr|B7ZZV6|B7ZZV6_MAIZE	Putative pumilio/Mpt5 family RNA-binding protein		S210	↑(withholding water,1d)	↑(withholding water,4-5 d)	Zea mays	Bonhomme et al., 2012
			tr|B7ZZV6|B7ZZV6_MAIZE	Putative pumilio/Mpt5 family RNA-binding protein		S249/S250		↑(withholding water,4-5 d)	Zea mays	Bonhomme et al., 2012
			GRMZM2G012964_P01	Putative pumilio/Mpt5 family RNA-binding protein		S245/S246/S247		↑(withholding water,4-5 d)	Zea mays	Bonhomme et al., 2012
			GRMZM2G012964_P01	Putative pumilio/Mpt5 family RNA-binding protein		S202		↑(withholding water,4-5 d)	Zea mays	Bonhomme et al., 2012
			GRMZM2G012964_P01	Putative pumilio/Mpt5 family RNA-binding protein		S31/T35	↑(withholding water,1d)	↑(withholding water,4-5 d)	Zea mays	Bonhomme et al., 2012
	RNA polymerase ii-associated factor 1 homolog	RNAP	K7U162	RNA polymerase ii-associated factor 1 homolog	vEDIDQYSEEYsE	T(9): 100.0	↑(PEG −0.7MPa, 8h)		Zea mays	Hu et al., 2015
			K7U162	RNA polymerase ii-associated factor 1 homolog	vEDIDQySEEYsE	S(8): 100.0	↓(PEG −0.7MPa, 8h)		Zea mays	Hu et al., 2015
			C0P8E4	RNA polymerase-associated protein rtf1 homolog	aGsPPSDGSNDGNNR	S(5): 100.0	↓(PEG −0.7MPa, 8h)		Zea mays	Hu et al., 2015
			B4FN85	Mediator of RNA polymerase ii transcription subunit 6-like	lEkIGNVETEPDAVAsESk	S(3): 100.0; S(7): 100.0	↑(PEG −0.7MPa, 8h)		Zea mays	Hu et al., 2015
	Perq amino acid-rich with gyf domain-containing protein 2		K7VM50	Perq amino acid-rich with gyf domain-containing protein 2	qGssASLAGDDTNFSEEAVSk	T(9): 100.0	↑(PEG −0.7MPa, 8h)		Zea mays	Hu et al., 2015
	Nucleosome chromatin assembly factor		Q8L8G5	Nucleosome chromatin assembly factor group a	eSAAEtPEEQk	S(10): 100.0; T(11): 100.0	↓(PEG −0.7MPa, 8h)		Zea mays	Hu et al., 2015
	Nucleolar protein 56-like		B6TNS0	Nucleolar protein 56-like	eAsEEAEPk	S(2): 100.0; S(4): 99.9	↑(PEG −0.7MPa, 8h)		Zea mays	Hu et al., 2015
	Nucleic acid binding protein		K7U573	Nucleic acid binding protein	nQsNVNR	T(9): 76.6; T(12): 76.6	↓(PEG −0.7MPa, 8h)		Zea mays	Hu et al., 2015
	MYB-C c type transfactor		B4F7W7	MYB-C c type transfactor	tEPtPAPAsESPtQVGASNR	S(6): 100.0	↑(PEG −0.7MPa, 8h)		Zea mays	Hu et al., 2015
	G-box binding factor 1		Q41735	G-box binding factor 1	aAAsPSsPR	S(17):97.3	↓(PEG −0.7MPa, 8h)		Zea mays	Hu et al., 2015
	DNA binding protein		C4IZL5	DNA binding protein	sAGsADEDDDGPASGSGR	S(3):100.0	↓(PEG −0.7MPa, 8h)		Zea mays	Hu et al., 2015
	CBS domain containing protein		B4FAB7	CBS domain containing protein	nmESTSPSAASSSSTQLsPR	S(2):99.9	↑(PEG −0.7MPa, 8h)		Zea mays	Hu et al., 2015
	C3h11 c3h type transcription partial		K7TSC5	C3h11 c3h type transcription partial	sAsFIAsPR	S(1):100.0	↓(PEG −0.7MPa, 8h)		Zea mays	Hu et al., 2015
	Bromodomain protein 103		Q8H6B2	Bromodomain protein 103	fsALSyGsSIPLVyRPR	T(7):90.6	↓(PEG −0.7MPa, 8h)		Zea mays	Hu et al., 2015
	Bel1-type homeodomain protein		B6SXN6	Bel1-type homeodomain protein	gGASSsGAAAQsPSSAPNkEPPQLSPADR	T(8):83.8	↑(PEG −0.7MPa, 8h)		Zea mays	Hu et al., 2015
	Nuclear-interacting partner of alk		B4FXM8	Nuclear-interacting partner of alk	dTELDEASNETQPEtGSPLRk	T(7): 100.0	↓(PEG −0.7MPa, 8h)		Zea mays	Hu et al., 2015
			B4FXM8	Nuclear-interacting partner of alk	dTELDEASNETQPETGsPLR	S(8): 82.8	↓(PEG −0.7MPa, 8h)		Zea mays	Hu et al., 2015
	Splicing factor 3B subunit 1			Splicing factor 3B subunit 1	LLAT(ph)PT(ph)PLGT(ph)PMYAIPEENR (HX10)/ILEPPASYQPIRT(ph)PAR (NC47)	T314 (HX10)/T300 (NC47)	↑(20% PEG, 48 h, HX10)		Triticum aestivum	Zhang et al., 2014
					LLAT(ph)PT(ph)PLGT(ph)PMYAIPEENR (HX10)	T308 (HX10)	↑(20% PEG, 48 h, HX10)		Triticum aestivum	Zhang et al., 2014
					LLAT(ph)PT(ph)PLGT(ph)PMYAIPEENR (HX10)	T310 (HX10)	↑(20% PEG, 48 h, HX10)		Triticum aestivum	Zhang et al., 2014
					HDAFASGEAT(ph)PDPSVR (HX10)/HDAFASGEAT(ph)PDPSVR (NC47)	T39 (HX10)/T39 (NC47)	↑(20% PEG, 48 h, HX10)	(+)(20% PEG, 48 h, NC47)	Triticum aestivum	Zhang et al., 2014
	Neurofilament heavy polypeptide			Neurofilament heavy polypeptide	GKS(ph)YS(ph)RS(ph)PS(ph)PR (HX10)/ARS(ph)PT(ph)PPGSR (NC47)	S262 (HX10)/S372 (NC47)	↓(20% PEG, 48 h, HX10)	↓(20% PEG, 48 h, NC47)	Triticum aestivum	Zhang et al., 2014
					GKS(ph)YS(ph)RS(ph)PS(ph)PR (HX10)/ADS(ph)PNNMSPAANGR (NC47)	S264 (HX10)/S395 (NC47)	↓(20% PEG, 48 h, HX10)	↓(20% PEG, 48 h, NC47)	Triticum aestivum	Zhang et al., 2014
					GKS(ph)YS(ph)RS(ph)PS(ph)PR (HX10)	S266 (HX10)	↓(20% PEG, 48 h, HX10)		Triticum aestivum	Zhang et al., 2014
					GKS(ph)YS(ph)RS(ph)PS(ph)PR (HX10)	S268 (HX10)	↓(20% PEG, 48 h, HX10)		Triticum aestivum	Zhang et al., 2014
					ARS(ph)PT(ph)PPGS(ph)RS(ph)PAPR (HX10)	S378 (HX10)	↓(20% PEG, 48 h, HX10)		Triticum aestivum	Zhang et al., 2014
					ARS(ph)PT(ph)PPGS(ph)RS(ph)PAPR (HX10)	S380 (HX10)	↓(20% PEG, 48 h, HX10)		Triticum aestivum	Zhang et al., 2014
					ARS(ph)PT(ph)PPGS(ph)RS(ph)PAPR (HX10)	T374 (HX10)	↓(20% PEG, 48 h, HX10)		Triticum aestivum	Zhang et al., 2014
	R3h domain containing protein, Putative		GRMZM2G103345_P02	R3h domain containing protein, Putative		T278			Zea mays	Bonhomme et al., 2012
	High mobility group	HMG	GRMZM2G125648_P01	HMG1/2-like protein		S159		↓(withholding water,4-5 d)	Zea mays	Bonhomme et al., 2012
			tr|B6TWE3|B6TWE3_MAIZE	HMGI/Y protein		S151		↓(withholding water,4-5 d)	Zea mays	Bonhomme et al., 2012
			tr|Q9FYS5|Q9FYS5_MAIZE	High mobility group I/Y-2		S155/S157		↓(withholding water,4-5 d)	Zea mays	Bonhomme et al., 2012
				HMG-I/Y protein HMGa	S(ph)AISSYIEEK (HX10)/VTTEAAS(ph)PAPASGSAPAK (NC47)	S9 (HX10)/S167 (NC47)	↓(20% PEG, 48 h, HX10)	↑(20% PEG, 48 h, NC47)	Triticum aestivum	Zhang et al., 2014
	Histone	Histone	tr|B4FZG8|B4FZG8_MAIZE	Putative uncharacterized protein (IPR005819 Histone H5)		S395		↓(withholding water,4-5 d)	Zea mays	Bonhomme et al., 2012
	HemK methyltransferase family member 2		GRMZM2G121840_P01	HemK methyltransferase family member 2		S255		↓(withholding water,4-5 d)	Zea mays	Bonhomme et al., 2012
	DNA (cytosine-5)-methyltransferase 1		GRMZM2G025592_P01	DNA (cytosine-5)-methyltransferase 1		S118		↓(withholding water,4-5 d)	Zea mays	Bonhomme et al., 2012
			GRMZM2G025592_P01	DNA (cytosine-5)-methyltransferase 1		S5		↓(withholding water,4-5 d)	Zea mays	Bonhomme et al., 2012
	Putative methyl-binding domain protein	MBD	GRMZM2G157470_P01	Putative methyl-binding domain protein MBD115		S138/T144		↑(withholding water,4-5 d)	Zea mays	Bonhomme et al., 2012
			GRMZM2G157470_P01	Putative methyl-binding domain protein MBD115		S341		↓(withholding water,4-5 d)	Zea mays	Bonhomme et al., 2012
			tr|B6TRL2|B6TRL2_MAIZE	Putative methyl-binding domain protein MBD105		S252	↑(withholding water,1d)	↑(withholding water,4-5 d)	Zea mays	Bonhomme et al., 2012
			tr|B6TRL2|B6TRL2_MAIZE	Putative methyl-binding domain protein MBD105		S332		↑(withholding water,4-5 d)	Zea mays	Bonhomme et al., 2012
			tr|B6TRL2|B6TRL2_MAIZE	Putative methyl-binding domain protein MBD105		S300		↑(withholding water,4-5 d)	Zea mays	Bonhomme et al., 2012
	Histone deacetylase		GRMZM2G159032_P04	Histone deacetylase 2b		S101	↓(withholding water,1d)	↓(withholding water,4-5 d)	Zea mays	Bonhomme et al., 2012
			sp|Q9M4U5|HDT2_MAIZE	Histone deacetylase HDT2		S105			Zea mays	Bonhomme et al., 2012
	Plus-3 domain containing protein, expressed		GRMZM2G443814_P02	Plus-3 domain containing protein, expressed		S373	↑(withholding water,1d)	↓(withholding water,4-5 d)	Zea mays	Bonhomme et al., 2012
	Putative uncharacterized protein (IPR001005 SANT, DNA-binding)		GRMZM2G334722_P01	Putative uncharacterized protein (IPR001005 SANT, DNA-binding)		S56		↓(withholding water,4-5 d)	Zea mays	Bonhomme et al., 2012
	Bromo-adjacent homology (BAH) domain-containing protein-like		GRMZM2G704338_P02	Bromo-adjacent homology (BAH) domain-containing protein-like		S744		↑(withholding water,4-5 d)	Zea mays	Bonhomme et al., 2012
	Bromo domain-containing protein, putative		GRMZM2G010075_P02	Bromodomain-containing protein, putative		S124	↓(withholding water,1d)	↑(withholding water,4-5 d)	Zea mays	Bonhomme et al., 2012
	Protein DEK, putative		GRMZM2G375984_P01	Protein DEK, putative		S115		↓(withholding water,4-5 d)	Zea mays	Bonhomme et al., 2012
	04 Protein synthesis
	Translation initiation factor	TIF	tr|B4FBV8|B4FBV8_MAIZE	Eukaryotic translation initiation factor 3 subunit G		T168/S169		↓(withholding water,4-5 d)	Zea mays	Bonhomme et al., 2012
			GRMZM2G153162_P03	Putative eukaryotic translation initiation factor 4G		S183	↑(withholding water,1d)	↑(withholding water,4-5 d)	Zea mays	Bonhomme et al., 2012
			GRMZM2G163471_P01	Eukaryotic translation initiation factor 4B		T274	↓(withholding water,1d)	↓(withholding water,4-5 d)	Zea mays	Bonhomme et al., 2012
			B4FQU2	Translation initiation factor eif-2b beta subunit	tASStGDSDGk	S(5): 100.0	↑(PEG −0.7MPa, 8h)		Zea mays	Hu et al., 2015
			C0PBP2	Transcription initiation factor alpha subunit	aAGLNEsDADEDEEDEDQEDDSSPVLAPk	S(5): 71.4	↓(PEG −0.7MPa, 8h)		Zea mays	Hu et al., 2015
	Ribosomal protein	RP	B6T1H0	tpa:40sribosomalproteins9	sEsLAk	S(3): 100.0	↑(PEG −0.7MPa, 8h)		Zea mays	Hu et al., 2015
			B6T1H0	tpa:40sribosomalproteins9	aSAAtSA	T(1):80.6	↑(PEG −0.7MPa, 8h)		Zea mays	Hu et al., 2015
			B6T1H0	TPA: 40s ribosomal protein s9	asAAtSA	S(10): 80.0	↓(PEG −0.7MPa, 8h)		Zea mays	Hu et al., 2015
			B4FNM4	60s Acidic ribosomal protein p0	aAEPEEEsDEEMGFSLFDD	S(3):100.0	↑(PEG −0.7MPa, 8h)		Zea mays	Hu et al., 2015
			B6UIM2	40s ribosomal protein s10	gSAPADFQPsFR	S(3):100.0	↑(PEG −0.7MPa, 8h)		Zea mays	Hu et al., 2015
			gb|AAO37485.1	Ribosomal protein			↑(withholding water, 6 d)		Oryza sativa L.	Ke et al., 2009
	05 Protein processing
	Heat shock protein	HSP	B4G250	Heat shock protein 3	sIQIsG	T(6): 100.0	↓(PEG −0.7MPa, 8h)		Zea mays	Hu et al., 2015
			B6SZ69	Heat shock cognate 70 kDa protein 2	mYQGAAGPDmAGGmDQDAsPAGGSGAGPk	S(14): 96.7	↓(PEG −0.7MPa, 8h)		Zea mays	Hu et al., 2015
	Chaperone protein dnaj		B4FR07	Chaperone protein dnaj 15-like	yTIEQsIPEsPENGSVDGR	S(3):100.0;S(7):99.8	↑(PEG −0.7MPa, 8h)		Zea mays	Hu et al., 2015
			B6TAW2	Chaperone protein dnaj 10	nIDNmDGNDGsSPDSSPNR	S(7):99.8	↑(PEG −0.7MPa, 8h)		Zea mays	Hu et al., 2015
	Arginine serine-rich protein		K7V1I2	Arginine serine-rich protein 45-like	gsPSPR	S(12):96.7	↓(PEG −0.7MPa, 8h)		Zea mays	Hu et al., 2015
			K7V1I2	Arginine serine-rich protein 45-like	gRsPsPPPk	S(3):100.0	↑(PEG −0.7MPa, 8h)		Zea mays	Hu et al., 2015
			K7UKJ5	Splicing arginine serine-rich factor 7	sPSYNR	S(7): 100.0	↓(PEG −0.7MPa, 8h)		Zea mays	Hu et al., 2015
			B4FRX1	Splicing arginine serine-rich 7	gGSPTGsksP	S(2): 80.0	↓(PEG −0.7MPa, 8h)		Zea mays	Hu et al., 2015
			B4FRX1;B6TB14	Splicing arginine serine-rich 7	sRSPQDQVmsPPPk	S(3): 97.9	↑(PEG −0.7MPa, 8h)		Zea mays	Hu et al., 2015
			B6SL90	Splicing arginine serine-rich 7	eEsPYDNGYR	S(13): 81.1; S(15): 81.1	↑(PEG −0.7MPa, 8h)		Zea mays	Hu et al., 2015
			M1H541	Splicing arginine serine-rich 2	sYNHsPsPPR	T(8): 82.9	↓(PEG −0.7MPa, 8h)		Zea mays	Hu et al., 2015
	Arginine serine-rich splicing factor		C0P9H7	Arginine serine-rich splicing factor rsp41	rsPsPYGR	T(3):100.0	↑(PEG −0.7MPa, 8h)		Zea mays	Hu et al., 2015
			C0HIN5	Arginine serine-rich splicing factor rs2z37a transcript i	vNNGDDPsPk	S(5):93.4	↑(PEG −0.7MPa, 8h)		Zea mays	Hu et al., 2015
	06 Protein trafficking/degradation
	Ubiquitin protein ligase		GRMZM2G331368_P02	E3 ubiquitin protein ligase upl2, Putative		S1747		↓(withholding water,4-5 d)	Zea mays	Bonhomme et al., 2012
			EMS57252.1	E3 ubiquitin-protein ligase MIB2	S(ph)AELGTLGPGLK (HX10)/LNS(ph)M(ox)QSAAR (NC47)	S371 (HX10)/S428 (NC47)	↑(20% PEG, 48 h, HX10)	↑(20% PEG, 48 h, NC47)	Triticum aestivum	Zhang et al., 2014
			EMT26370.1	E3 ubiquitin-protein ligase UPL1	EGS(ph)AEQNENNENVDIPAVR (HX10)/EGS(ph)AEQNENNENVDIPAVR (NC47)	s2489 (HX10)/s2489 (NC47)	↓(20% PEG, 48 h, HX10)	↓(20% PEG, 48 h, NC47)	Triticum aestivum	Zhang et al., 2014
			tr|B7ZXG5|B7ZXG5_MAIZE	Ubiquitin interaction motif-containing protein		S21		↓(withholding water,4-5 d)	Zea mays	Bonhomme et al., 2012
			B6SRZ6	Ubiquitin-proteinligase	tVsAVGGGGGAPcsPSSR	S(2): 100.0	↑(PEG −0.7MPa, 8h)		Zea mays	Hu et al., 2015
			B6T6V5	Ubiquitin carboxyl-terminal hydrolase 6-like	sALLSYsDTVR	S(6): 100.0	↑(PEG −0.7MPa, 8h)		Zea mays	Hu et al., 2015
	Proteasome inhibitor		tr|B6TIB0|B6TIB0_MAIZE	Proteasome inhibitor-like protein		S178		↑(withholding water,4-5 d)	Zea mays	Bonhomme et al., 2012
	RPT2-like protein		B6ST41	RPT2-like protein	gGRStPPsSPSR	S(7): 50.0; S(8): 50.0; Y(19): 0.1	↓(PEG −0.7MPa, 8h)		Zea mays	Hu et al., 2015
	Putative ADP-ribosylation factor			Putative ADP-ribosylation factor	NQS(ph)AGSFAGAGADSGR (HX10)/NQS(ph)AGSFAGAGADSGR (NC47)	S176 (HX10)/S176 (NC47)	↓(20% PEG, 48 h, HX10)	(–)(20% PEG, 48 h, NC47)	Triticum aestivum	Zhang et al., 2014
					S(ph)AELGTLGPGLK (HX10)	s413 (HX10)	↑(20% PEG, 48 h, HX10)		Triticum aestivum	Zhang et al., 2014
	ATP-dependent zinc metalloprotease FTSH 5, mitochondrial			ATP-dependent zinc metalloprotease FTSH 5, mitochondrial	TTDAS(ph)PGAFQR (HX10)/WS(ph)PQVGDSSDTR (NC47)	s409 (HX10)/s422 (NC47)	↓(20% PEG, 48 h, HX10)	↓(20% PEG, 48 h, NC47)	Triticum aestivum	Zhang et al., 2014
					KDNS(ph)PTQTSVVIDDSK (HX10)/ITSGDMVMAS(ph)PVSAK (NC47)	s1626 (HX10)/s1838 (NC47)	↓(20% PEG, 48 h, HX10)	↑(20% PEG, 48 h, NC47)	Triticum aestivum	Zhang et al., 2014
	07 Cytoskeleton, cell cycle and cell wall components
	Proline-rich cell wall protein-like		GRMZM2G071249_P01	Proline-rich cell wall protein-like		S49	↓(withholding water,1d)	↓(withholding water,4-5 d)	Zea mays	Bonhomme et al., 2012
	Villin	Villin	tr|B8A0C4|B8A0C4_MAIZE	Villin-3, putative, expressed		S900/T902	↑(withholding water,1d)	↑(withholding water,4-5 d)	Zea mays	Bonhomme et al., 2012
			B4FXH4	Villin-2-like isoform 1	iVITPAGPSGPSsPQSEAGESNVFHQEk	S(3): 50.0; S(11): 50.0	↓(PEG −0.7MPa, 8h)		Zea mays	Hu et al., 2015
				Villin-4	S(ph)PAFNALAATFENSNAR (HX10)/S(ph)PAFNALAATFENSNAR (NC47)	S769 (HX10)/S769 (NC47)	↑(20% PEG, 48 h, HX10)	↑(20% PEG, 48 h, NC47)	Triticum aestivum	Zhang et al., 2014
					NLS(ph)TPPPVAR (NC47)	s788 (NC47)		↑(20% PEG, 48 h, NC47)	Triticum aestivum	Zhang et al., 2014
	Golgi SNARE 12 protein		tr|C0PCF2|C0PCF2_MAIZE	Golgi SNARE 12 protein		S56	↓(withholding water,1d)	↓(withholding water,4-5 d)	Zea mays	Bonhomme et al., 2012
	AIR9 protein		GRMZM2G012031_P01	AIR9 protein		S59		↑(withholding water,4-5 d)	Zea mays	Bonhomme et al., 2012
	Cellulose synthase		GRMZM2G027723_P01	Cellulose synthase-2		S158/S165		↓(withholding water,4-5 d)	Zea mays	Bonhomme et al., 2012
			Q9LLI8	Probable cellulose synthasea catalytic subunit2	lTSGQQISGEIPDAsPDR	S(7): 75.0	↓(PEG −0.7MPa, 8h)		Zea mays	Hu et al., 2015
	Nuclear matrix constituent protein 1		GRMZM2G015875_P02	Nuclear matrix constituent protein 1		S934		↑(withholding water,4-5 d)	Zea mays	Bonhomme et al., 2012
	Kinesin	Kinesin	GRMZM2G320689_P04	Kinesin heavy chain		T952		↓(withholding water,4-5 d)	Zea mays	Bonhomme et al., 2012
	Sterol 3-beta-glucosyltransferase		tr|B6SKE1|B6SKE1_MAIZE	Sterol 3-beta-glucosyltransferase		S74/T75		↑(withholding water,4-5 d)	Zea mays	Bonhomme et al., 2012
	Pollen-specific protein SF3		GRMZM2G128206_P02	Pollen-specific protein SF3		S79		↓(withholding water,4-5 d)	Zea mays	Bonhomme et al., 2012
	CLIP-associating protein 1-like		GRMZM2G052078_P02	CLIP-associating protein 1-like		T1161	↓(withholding water,1d)		Zea mays	Bonhomme et al., 2012
	USP family protein		tr|B6TBM4|B6TBM4_MAIZE	USP family protein		S35	↓(withholding water,1d)	↓(withholding water,4-5 d)	Zea mays	Bonhomme et al., 2012
			tr|B4FCK0|B4FCK0_MAIZE	USP family protein		S30			Zea mays	Bonhomme et al., 2012
	Microtubule-associated protein MAP65-1a		GRMZM2G465169_P01	Microtubule-associated protein MAP65-1a		S557		↓(withholding water,4-5 d)	Zea mays	Bonhomme et al., 2012
	Vacuolar protein sorting 26		tr|B4FT16|B4FT16_MAIZE	Vacuolar protein sorting 26		S221		↑(withholding water,4-5 d)	Zea mays	Bonhomme et al., 2012
	GTP-ase activating protein for Arf containing protein		tr|B8A180|B8A180_MAIZE	GTP-ase activating protein for Arf containing protein		S312/S313		↑(withholding water,4-5 d)	Zea mays	Bonhomme et al., 2012
			GRMZM2G341732_P02	GTP-ase activating protein for Arf containing protein		S340/S341/S343		↑(withholding water,4-5 d)	Zea mays	Bonhomme et al., 2012
			tr|B8A180|B8A180_MAIZE	GTP-ase activating protein for Arf containing protein		S241			Zea mays	Bonhomme et al., 2012
	ADP-ribosylation factor GTPase-activating protein 3		GRMZM2G176612_P02	ADP-ribosylation factor GTPase-activating protein 3		S406		↑(withholding water,4-5 d)	Zea mays	Bonhomme et al., 2012
	Adaptin N terminal region family protein		GRMZM2G092741_P01	Adaptin N terminal region family protein		S65	(withholding water,1d)		Zea mays	Bonhomme et al., 2012
	Epsin		GRMZM2G178398_P01	Putative epsin		S273	(withholding water,1d)	(withholding water,4-5 d)	Zea mays	Bonhomme et al., 2012
	Glycine-rich protein	GRP	C4JBR4	Glycine-rich protein2	sYGGsWGGGR	S(18):100.0	↑(PEG −0.7MPa, 8h)		Zea mays	Hu et al., 2015
	Cell division cycle 5-like	CDC	Q8W149	Cell division cycle5-like	eIQTPNPmATPLAsPGPGItPR	S(4):76.0	↓(PEG −0.7MPa, 8h)		Zea mays	Hu et al., 2015
			Q8W149	Cell division cycle 5-like	eIQTPNPmATPLASPGPGItPR	S(1):100.0	↓(PEG −0.7MPa, 8h)		Zea mays	Hu et al., 2015
	08 Membrane and transport
	Pleckstriny domain-containing expressed		B4FZE7	Pleckstriny domain-containing expressed	eNDLGISNQGsPDQVFSR	S(11): 95.6	↓(PEG −0.7MPa, 8h)		Zea mays	Hu et al., 2015
	Harpin binding protein 1		Q5QJA2	Harpin binding protein 1	gLAAsQEDLDR	T(14):97.1	↑(PEG −0.7MPa, 8h)		Zea mays	Hu et al., 2015
	Glycerol 3-phosphate permease		B8A1D5	Glycerol 3-phosphate permease	dVADAQGtYYSDEV	S(2):99.6	↓(PEG −0.7MPa, 8h)		Zea mays	Hu et al., 2015
	Ferric-chelate reductase 1-like		B6UCP3	Ferric-chelate reductase 1-like	lLITPtHGDSDSEQsYk	T(5):94.8	↓(PEG −0.7MPa, 8h)		Zea mays	Hu et al., 2015
	Vacuolar amino acid transporter 1-like		C0PEW7	Vacuolar amino acid transporter 1-like	sLIIQsDDDDDAR	S(10): 100.0	↑(PEG −0.7MPa, 8h)		Zea mays	Hu et al., 2015
	Nuclear-pore anchor-like isoform x3		B4FF32	Nuclear-pore anchor-like isoform x3	aAVEPDQSPITQPGAADASPsR	T(5): 100.0	↓(PEG −0.7MPa, 8h)		Zea mays	Hu et al., 2015
	Magnesium transporter mrs2-b-like isoform x1		C0PNW3	Magnesium transporter mrs2-b-like isoform x1	aYPSQVAsASSPALPSAPPGSAGR	S(12): 97.9	↓(PEG −0.7MPa, 8h)		Zea mays	Hu et al., 2015
	Hexose transporter		B6U6U2	Hexose transporter	eGEDYAsDHGGDDIEDNLQSPLISR	S(11): 100.0	↓(PEG −0.7MPa, 8h)		Zea mays	Hu et al., 2015
	Bidirectional sugar transporter sweet13-like		B4FTL9	Bidirectional sugar transporter sweet13-like	lsPALPER	S(4):99.7;S(10):99.8	↑(PEG −0.7MPa, 8h)		Zea mays	Hu et al., 2015
	ABC transporter	ABC transporter	K7V5J0	ABC transporter f family member 4-like	lGsDDDsENDR	S(1):100.0	↑(PEG −0.7MPa, 8h)		Zea mays	Hu et al., 2015
	Plasma membrane ATPase			Plasma membrane ATPase	T(ph)LHGLQAPEPASHTLFNDK (HX10)/T(ph)LHGLQAPEPASHTLFNDK (NC47)	T883 (HX10)/T883 (NC47)	↑(20% PEG, 48 h, HX10)	↑(20% PEG, 48 h, NC47)	Triticum aestivum	Zhang et al., 2014
	Citrate transporter family protein		tr|B8A307|B8A307_MAIZE	Citrate transporter family protein		S241	↑(withholding water,1d)	↑(withholding water,4-5 d)	Zea mays	Bonhomme et al., 2012
	Carbohydrate transporter/ sugar porter/ transporter		tr|B6U8S7|B6U8S7_MAIZE	Carbohydrate transporter/ sugar porter/ transporter		S5		↓(withholding water,4-5 d)	Zea mays	Bonhomme et al., 2012
	Monosaccharide-sensing protein 2			Monosaccharide-sensing protein 2	HGS(ph)MVSQGK (HX10)/MPEVMGS(ph)MR (NC47)	S292 (HX10)/S321 (NC47)	↑(20% PEG, 48 h, HX10)	↑(20% PEG, 48 h, NC47)	Triticum aestivum	Zhang et al., 2014
					GGGQS(ph)ALGS(ph)ALGLM(ox)SR (HX10)/GGGQSALGSALGLMS(ph)R (NC47)	S282 (HX10)/S288 (NC47)	↑(20% PEG, 48 h, HX10)	↑(20% PEG, 48 h, NC47)	Triticum aestivum	Zhang et al., 2014
					S(ph)TLFPNFGS(ph)MFSVAEQQQAK (HX10)/LYGAEEGVS(ph)WIAR (NC47)	S332 (HX10)/S266 (NC47)	↑(20% PEG, 48 h, HX10)	↑(20% PEG, 48 h, NC47)	Triticum aestivum	Zhang et al., 2014
					EIAAPHGS(ph)IMGGVGR (HX10)	S393 (HX10)	↑(20% PEG, 48 h, HX10)		Triticum aestivum	Zhang et al., 2014
					GGGQS(ph)ALGS(ph)ALGLM(ox)SR (HX10)	S278 (HX10)	↑(20% PEG, 48 h, HX10)		Triticum aestivum	Zhang et al., 2014
	9 Photosynthesis and photorespiration
	Photosystem I reaction center subunit	PSI	B4FAW3(B6SKI1)	Photosystem i reaction center subunit ii	gFVAPQLDPSTPSPIFGGStGGLLR	T(11): 94.3; S(19): 94.3; S(20): 94.3	↓(PEG −0.7MPa, 8h)		Zea mays	Hu et al., 2015
	Photosystem II reaction center protein	PSII	sp|P24993|PSBH_MAIZE	Photosystem II reaction center protein H		S9/S10		↑(withholding water,4-5 d)	Zea mays	Bonhomme et al., 2012
	Chlorophyll a/b-binding protein	LHC	tr|C0HF02|C0HF02_MAIZE	Chlorophyll a/b-binding protein CP29		T112		↑(withholding water,4-5 d)	Zea mays	Bonhomme et al., 2012
			B4FJG1	Chlorophyll a-b binding protein chloroplastic-like	nEAGGIIGtRFESSDVk	S(3):95.3;S(14):100.0;	↑(PEG −0.7MPa, 8h)		Zea mays	Hu et al., 2015
			B4FJG1	Chlorophyll a-b binding protein chloroplastic-like	nEAGGIIGtR	S(7):100.0	↑(PEG −0.7MPa, 8h)		Zea mays	Hu et al., 2015
			C0HF02	Chlorophyll a-b binding protein chloroplastic-like	fEsSEVk	S(3):100.0	↑(PEG −0.7MPa, 8h)		Zea mays	Hu et al., 2015
			C0HF02	Chlorophyll a-b binding protein chloroplastic-like	nEAGGIIGtRFESSEVk	T(5):80.0	↑(PEG −0.7MPa, 8h)		Zea mays	Hu et al., 2015
	Ferredoxin- chloroplastic precursor	Fd	P27789	Ferredoxin- chloroplastic precursor	atVLSSPR	S(3):96.7	↑(PEG −0.7MPa, 8h)		Zea mays	Hu et al., 2015
	Calvin cycle protein cp12- chloroplastic-like		B6U3H3	Calvin cycle protein cp12- chloroplastic-like	ssGPATPPEISDk	S(3):100.0;S(4):100.0	↑(PEG −0.7MPa, 8h)		Zea mays	Hu et al., 2015
	Protochlorophyllide reductase b	PORA	B4FKM0	Protochlorophyllidereductase b	aQTAAVsSPSVTPASPSGk	T(15): 80.0	↓(PEG −0.7MPa, 8h)		Zea mays	Hu et al., 2015
	Oxygen-evolving enhancer protein 1	OEC	B4FRF2	Oxygen-evolving enhancer protein 1	gGsTGYDNAVALPAGGR	S(8): 100.0	↑(PEG −0.7MPa, 8h)		Zea mays	Hu et al., 2015
	Putative AMP deaminase			Putative AMP deaminase	VGSLVRPTT(ph)PK (HX10)/VGSLVRPTT(ph)PK (NC47)	T60 (HX10)/T60 (NC47)	↑(20% PEG, 48 h, HX10)	↑(20% PEG, 48 h, NC47)	Triticum aestivum	Zhang et al., 2014
	10 Carbohydrate and energy metabolism
	Sucrose phosphate synthase A		GRMZM2G055331_P08	Sucrose phosphate synthase A		S95	↑(withholding water,1d)		Zea mays	Bonhomme et al., 2012
	Sucrose synthase 3	SUS	GRMZM2G060659_P02	Sucrose synthase 3		T846		↑(withholding water,4-5 d)	Zea mays	Bonhomme et al., 2012
	Galactose mutarotase-like		GRMZM2G039588_P02	Galactose mutarotase-like		S158		↑(withholding water,4-5 d)	Zea mays	Bonhomme et al., 2012
	Phosphoglucomutase, cytoplasmic 2	PGM	GRMZM2G023289_P03	Phosphoglucomutase, cytoplasmic 2		S106		↑(withholding water,4-5 d)	Zea mays	Bonhomme et al., 2012
	6-phosphofructokinase	PFK	GRMZM2G004932_P01	6-phosphofructokinase		S79		↑(withholding water,4-5 d)	Zea mays	Bonhomme et al., 2012
	AAA-type ATPase family protein		GRMZM2G058491_P01	AAA-type ATPase family protein		S217	(withholding water,1d)	(withholding water,4-5 d)	Zea mays	Bonhomme et al., 2012
			GRMZM2G058491_P01	AAA-type ATPase family protein		S205		↑(withholding water,4-5 d)	Zea mays	Bonhomme et al., 2012
			GRMZM2G058491_P01	AAA-type ATPase family protein		S162		(withholding water,4-5 d)	Zea mays	Bonhomme et al., 2012
			GRMZM2G117028_P01	ATPase, AAA family protein, expressed		T707		↓(withholding water,4-5 d)	Zea mays	Bonhomme et al., 2012
	Phosphoenolpyruvate carboxykinase	PEPCK	C0P3W9	Phosphoenolpyruvate carboxykinase	rsAPTtPIk	S(2): 96.2	↓(PEG −0.7MPa, 8h)		Zea mays	Hu et al., 2015
			C0P3W9	Phosphoenolpyruvate carboxykinase	sAPStPkR	S(7): 98.0	↑(PEG −0.7MPa, 8h)		Zea mays	Hu et al., 2015
			C0P3W9	Phosphoenolpyruvate carboxykinase	gEAAAQGAPstPR	T(2): 100.0; S(10): 100.0	↓(PEG −0.7MPa, 8h)		Zea mays	Hu et al., 2015
			C0P3W9	Phosphoenolpyruvate carboxykinase	gGAHsPFAVAISEEER	T(6): 86.8	↓(PEG −0.7MPa, 8h)		Zea mays	Hu et al., 2015
			C0P3W9	Phosphoenolpyruvate carboxykinase	sAPStPKR	S(5): 100.0	↓(PEG −0.7MPa, 8h)		Zea mays	Hu et al., 2015
			C0P3W9	Phosphoenolpyruvate carboxykinase	sAPStPkRsAPTtPIk	S(15): 75.5	↓(PEG −0.7MPa, 8h)		Zea mays	Hu et al., 2015
			C0P3W9	Phosphoenolpyruvate carboxykinase	sAPSTPk	S(9): 100.0	↓(PEG −0.7MPa, 8h)		Zea mays	Hu et al., 2015
			C0P3W9	Phosphoenolpyruvate carboxykinase	gEAAAQGAPstPR	S(5): 79.4	↓(PEG −0.7MPa, 8h)		Zea mays	Hu et al., 2015
	Fructose-bisphosphatealdolase	FBPA	C0PD30	Fructose-bisphosphatealdolase	lAsIGLENTEANR	S(7):81.2	↓(PEG −0.7MPa, 8h)		Zea mays	Hu et al., 2015
	Probable-trehalose-phosphate synthase	TPS	K7V0H0	Probable-trehalose-phosphate synthase	vmsVASPASPTsPSPPAPPR	S(4): 97.3	↓(PEG −0.7MPa, 8h)		Zea mays	Hu et al., 2015
	Phosphoenol pyruvate carboxylase	PEPC	E9NQE1	Phosphoenol pyruvate carboxylase	hHsIDAQLR	S(2): 99.9	↑(PEG −0.7MPa, 8h)		Zea mays	Hu et al., 2015
	NAD-malate dehydrogenase	MDH	trm|Q941V4	NAD-malate dehydrogenase			↑(withholding water, 6 d)		Oryza sativa L.	Ke et al., 2009
	11 Other metabolism
	C2 domain containing protein		tr|C4JAS1|C4JAS1_MAIZE	C2 domain containing protein		S401		↓(withholding water,4-5 d)	Zea mays	Bonhomme et al., 2012
	Cytosolic orthophosphate dikinase		tr|C5IHC4|C5IHC4_MAIZE	Cytosolic orthophosphate dikinase		T461		↑(withholding water,4-5 d)	Zea mays	Bonhomme et al., 2012
	Early fruit mRNA		tr|B4FJ52|B4FJ52_MAIZE	Early fruit mRNA		S258	↑(withholding water,1d)	↑(withholding water,4-5 d)	Zea mays	Bonhomme et al., 2012
	Esterase		GRMZM2G166987_P02	Esterase		Y17		↑(withholding water,4-5 d)	Zea mays	Bonhomme et al., 2012
	Gb protein		GRMZM2G033130_P04	Gb protein		S19/T21	↓(withholding water,1d)	↓(withholding water,4-5 d)	Zea mays	Bonhomme et al., 2012
	Lectin-like protein		tr|B4FWN7|B4FWN7_MAIZE	Lectin-like protein		S33/T35		↑(withholding water,4-5 d)	Zea mays	Bonhomme et al., 2012
	Peptidylprolyl isomerase, putative, expressed		GRMZM2G007486_P02	Peptidylprolyl isomerase, putative, expressed		T320	↑(withholding water,1d)	(withholding water,4-5 d)	Zea mays	Bonhomme et al., 2012
	Putative nucleic acid binding protein		tr|B4G0R6|B4G0R6_MAIZE	Putative nucleic acid binding protein		S91		↓(withholding water,4-5 d)	Zea mays	Bonhomme et al., 2012
	Sel1-like repeat		GRMZM2G133016_P01	Sel1-like repeat		S620, S643		↑(withholding water,4-5 d)	Zea mays	Bonhomme et al., 2012
	SelT/selW/selH selenoprotein domain containing protein		tr|B6TEF3|B6TEF3_MAIZE	SelT/selW/selH selenoprotein domain containing protein		S17	↑(withholding water,1d)	↓(withholding water,4-5 d)	Zea mays	Bonhomme et al., 2012
	Transmembrane protein 115		GRMZM2G172138_P01	Transmembrane protein 115		S335	↑(withholding water,1d)	↓(withholding water,4-5 d)	Zea mays	Bonhomme et al., 2012
	Transmembrane protein 115		tr|B4FKV2|B4FKV2_MAIZE	Transmembrane protein 115		S310		↓(withholding water,4-5 d)	Zea mays	Bonhomme et al., 2012
	Zn-containing protein		B4FC96	Zn-containing protein	gsPmPVSSPWsGGALAENNDNIASR	S(3): 100.0	↑(PEG −0.7MPa, 8h)		Zea mays	Hu et al., 2015
	Vacuolar-sorting receptor3-likes		B6U4K3	Vacuolar-sorting receptor3-likes	LGLDVk	S(14): 99.9	↑(PEG −0.7MPa, 8h)		Zea mays	Hu et al., 2015
	U2snrnp-associatedsurp motif-containing		C0HE61	U2snrnp-associatedsurp motif-containing	tsSSSER	S(7): 98.5	↑(PEG −0.7MPa, 8h)		Zea mays	Hu et al., 2015
	TPA: Zn-containing protein		C0PGC2	TPA: Zn-containing protein	rPGsPPPQR	Y(2): 90.2	↑(PEG −0.7MPa, 8h)		Zea mays	Hu et al., 2015
	Skin secretory protein xp2-like		K7UVT7	Skin secretory protein xp2-like	sSEESEAANDDDDAsA	S(3): 77.0; S(7): 77.0	↑(PEG −0.7MPa, 8h)		Zea mays	Hu et al., 2015
	Ring-h2 finger protein atl13-like		K7V664	Ring-h2 finger protein atl13-like	dLAAGDGtGSGNSSGR	S(10): 100.0; S(13): 97.8	↓(PEG −0.7MPa, 8h)		Zea mays	Hu et al., 2015
	Reticulon-likeproteinb8-like		B6SS42	Reticulon-likeproteinb8-like	lFGGGEsR	S(10): 99.6	↓(PEG −0.7MPa, 8h)		Zea mays	Hu et al., 2015
	Protein notum homolog		B6U7Q4	Protein notum homolog	gGGGAGGPtTmR	S(5): 98.1	↑(PEG −0.7MPa, 8h)		Zea mays	Hu et al., 2015
	Pollen-specific protein sf3		K7UE26	Pollen-specific protein sf3	tSQAGsLEEDEQEY	S(1): 75.2	↓(PEG −0.7MPa, 8h)		Zea mays	Hu et al., 2015
	Phd-finger family homeodomain protein		Q41812	Phd-finger family homeodomain protein	sAsNNk	T(8): 82.9	↓(PEG −0.7MPa, 8h)		Zea mays	Hu et al., 2015
	Nucleolin-like isoform x1		B6T890	Nucleolin-like isoform x1	eNsNLIDADDSDELR	S(5): 100.0	↓(PEG −0.7MPa, 8h)		Zea mays	Hu et al., 2015
	Mitochondrial glycoprotein		C0PD11	Mitochondrial glycoprotein	aFSLTAAGtHAtPR	S(3): 100.0	↓(PEG −0.7MPa, 8h)		Zea mays	Hu et al., 2015
	Membrane-anchored ubiquitin-fold protein 3-like		B4FFI8	Membrane-anchored ubiquitin-fold protein 3-like	nsGIADNFSLLFISFsWLP	S(7): 100.0	↓(PEG −0.7MPa, 8h)		Zea mays	Hu et al., 2015
	Leucine-rich repeat-containing proteinddb_g0290503-like		K7TNK3	Leucine-rich repeat-containing proteinddb_g0290503-like	qItLSEIk	S(17): 100.0	↓(PEG −0.7MPa, 8h)		Zea mays	Hu et al., 2015
	DUF1664 domain family protein isoform 1		B6TCM5	DUF1664 domain family protein isoform 1	hNmANAVsSMtkHLEQVQssLAAAk	S(3):100.0;S(9):100.0	↑(PEG −0.7MPa, 8h)		Zea mays	Hu et al., 2015
	Desi-likeproteinhag1-like		B6TH05	Desi-likeproteinhag1-like	nQASPEsPGNNQNR	S(5):100.0	↓(PEG −0.7MPa, 8h)		Zea mays	Hu et al., 2015
	ATP binding protein		B6U6Y9	ATP binding protein	ltFcVEGNIsVGk	S(5):100.0	↑(PEG −0.7MPa, 8h)		Zea mays	Hu et al., 2015
	Ankyrin repeat domain-containing protein 2-like		B4FRE3	Ankyrin repeat domain-containing protein 2-like	tVVsPR	S(10):78.0	↑(PEG −0.7MPa, 8h)		Zea mays	Hu et al., 2015
	Ankyrin repeat domain-containing protein 2-like		B4G137	Ankyrin repeat domain-containing protein 2-like	sEGSsDER	S(3):88.1	↑(PEG −0.7MPa, 8h)		Zea mays	Hu et al., 2015
	2-Aminoethanethiol dioxygenase-like		B4FFI4	2-Aminoethanethiol dioxygenase-like	aAAAsGGPR	S(14):94.0;T(20):94.0	↑(PEG −0.7MPa, 8h)		Zea mays	Hu et al., 2015
	Geranylgeranyl pyrophosphate synthase 4		K7U2X9	Geranylgeranyl pyrophosphate synthase 4	sAsGNGk	S(3):100.0	↑(PEG −0.7MPa, 8h)		Zea mays	Hu et al., 2015
	Peroxisome biogenesis protein 6-like		K7TNN3	Peroxisome biogenesis protein 6-like	atTSGR	T(9): 100.0	↑(PEG −0.7MPa, 8h)		Zea mays	Hu et al., 2015
	tpa:duf827domain containing family protein		B6U0R6	tpa:duf827domain containing family protein	nEAsVEDLQGmEDVSLSLEEYsELAAk	S(16): 93.3	↓(PEG −0.7MPa, 8h)		Zea mays	Hu et al., 2015
	OSJNBa0084K20.14 protein		trm|Q7X7H3	OSJNBa0084K20.14 protein			↑(withholding water, 6 d)		Oryza sativa L.	Ke et al., 2009
	Abscisic acid- and stress- inducible protein		trm|O49149	Abscisic acid- and stress- inducible protein			↑(withholding water, 6 d)		Oryza sativa L.	Ke et al., 2009
	r40c1 protein		trm|Q9FTY4	r40c1 protein			↓(withholding water, 6 d)		Oryza sativa L.	Ke et al., 2009
	Ethylene-inducible protein		trm|Q8W3D0	Ethylene-inducible protein			↑(withholding water, 6 d)		Oryza sativa L.	Ke et al., 2009
	Guanine nucleotide-binding protein beta subunit-like protein		spt|P49027	Guanine nucleotide-binding protein beta subunit-like protein			↑(withholding water, 6 d)		Oryza sativa L.	Ke et al., 2009
	12 Unknown
			tr|C0P3S0|C0P3S0_MAIZE	Putative uncharacterized protein		S171		↑(withholding water,4-5 d)	Zea mays	Bonhomme et al., 2012
			GRMZM2G106590_P01	Putative uncharacterized protein		S371/S372		↑(withholding water,4-5 d)	Zea mays	Bonhomme et al., 2012
			tr|C0PDZ9|C0PDZ9_MAIZE	Putative uncharacterized protein		S349/S350		↑(withholding water,4-5 d)	Zea mays	Bonhomme et al., 2012
			GRMZM2G101760_P01	Putative uncharacterized protein		S177	↑(withholding water,1d)	↑(withholding water,4-5 d)	Zea mays	Bonhomme et al., 2012
			GRMZM2G101760_P01	Putative uncharacterized protein		S166		↓(withholding water,4-5 d)	Zea mays	Bonhomme et al., 2012
			GRMZM2G152768_P01	Putative uncharacterized protein		S19/T21/T23	↓(withholding water,1d)	↓(withholding water,4-5 d)	Zea mays	Bonhomme et al., 2012
			GRMZM2G420789_P01	Putative uncharacterized protein		S7	↓(withholding water,1d)	↑(withholding water,4-5 d)	Zea mays	Bonhomme et al., 2012
			GRMZM2G045503_P01	Putative uncharacterized protein		S14		↓(withholding water,4-5 d)	Zea mays	Bonhomme et al., 2012
			GRMZM2G021015_P01	Putative uncharacterized protein		S153	↑(withholding water,1d)	↓(withholding water,4-5 d)	Zea mays	Bonhomme et al., 2012
			GRMZM2G024811_P02	Putative uncharacterized protein		S190	↓(withholding water,1d)	↓(withholding water,4-5 d)	Zea mays	Bonhomme et al., 2012
			tr|B4FF32|B4FF32_MAIZE	Putative uncharacterized protein		S326		↑(withholding water,4-5 d)	Zea mays	Bonhomme et al., 2012
			GRMZM2G126266_P02	Putative uncharacterized protein		S167		↑(withholding water,4-5 d)	Zea mays	Bonhomme et al., 2012
			tr|B6THW0|B6THW0_MAIZE	Putative uncharacterized protein		S35		↓(withholding water,4-5 d)	Zea mays	Bonhomme et al., 2012
			tr|C0PF30|C0PF30_MAIZE	Putative uncharacterized protein		S220		↓(withholding water,4-5 d)	Zea mays	Bonhomme et al., 2012
			GRMZM2G030038_P01	Putative uncharacterized protein		S25			Zea mays	Bonhomme et al., 2012
			GRMZM2G354053_P01	Putative uncharacterized protein		T665		↑(withholding water,4-5 d)	Zea mays	Bonhomme et al., 2012
			tr|B6SS45|B6SS45_MAIZE	Putative uncharacterized protein		S89/Y90/S91		↑(withholding water,4-5 d)	Zea mays	Bonhomme et al., 2012
			tr|B4FUX9|B4FUX9_MAIZE	Putative uncharacterized protein		S68	↑(withholding water,1d)	↑(withholding water,4-5 d)	Zea mays	Bonhomme et al., 2012
			tr|C0P2X8|C0P2X8_MAIZE	Putative uncharacterized protein		S50		↓(withholding water,4-5 d)	Zea mays	Bonhomme et al., 2012
			tr|B6SP75|B6SP75_MAIZE	Putative uncharacterized protein		S66		↑(withholding water,4-5 d)	Zea mays	Bonhomme et al., 2012
			tr|B8A0H2|B8A0H2_MAIZE	Putative uncharacterized protein		S127		↑(withholding water,4-5 d)	Zea mays	Bonhomme et al., 2012
			tr|B6U4P1|B6U4P1_MAIZE	Putative uncharacterized protein		S34		↓(withholding water,4-5 d)	Zea mays	Bonhomme et al., 2012
			GRMZM2G449274_P01	Putative uncharacterized protein		S163, T188	↑(withholding water,1d)	↑(withholding water,4-5 d)	Zea mays	Bonhomme et al., 2012
			tr|B4FV35|B4FV35_MAIZE	Putative uncharacterized protein		S46/S47	↑(withholding water,1d)	↑(withholding water,4-5 d)	Zea mays	Bonhomme et al., 2012
			GRMZM2G041876_P01	Putative uncharacterized protein Sb06g021700		S717		↓(withholding water,4-5 d)	Zea mays	Bonhomme et al., 2012
			tr|B6U4P1|B6U4P1_MAIZE	Putative uncharacterized protein		S58, S62		↓(withholding water,4-5 d)	Zea mays	Bonhomme et al., 2012
			B4FKH3	Unknown	kVEcLsGSPPMAISyVsk	S(3): 98.3	↑(PEG −0.7MPa, 8h)		Zea mays	Hu et al., 2015
			C0PF35	Unknown	dsSQGR	S(2): 100.0; T(6): 100.0	↓(PEG −0.7MPa, 8h)		Zea mays	Hu et al., 2015
			C4J042	Unknown	ymFAQItcGNGNAPtDSMk	T(5): 97.7	↑(PEG −0.7MPa, 8h)		Zea mays	Hu et al., 2015
			C4J4L7	Uncharacterizedprotein LOC100501611	nsAGALHtSSSIPmSPTAk	S(3): 100.0	↑(PEG −0.7MPa, 8h)		Zea mays	Hu et al., 2015
			B4FUV7	Uncharacterized protein	sLscAER	S(3): 100.0	↑(PEG −0.7MPa, 8h)		Zea mays	Hu et al., 2015
			K7UB62	Uncharacterized protein	tMTGLASSTDQSsAsSSPR	T(2): 99.9	↓(PEG −0.7MPa, 8h)		Zea mays	Hu et al., 2015
			K7U5U1	Hypothetical protein ZEAMMB73_848936	nAPsLGmGMMIk	S(12): 83.3	↓(PEG −0.7MPa, 8h)		Zea mays	Hu et al., 2015
			K7TMH1	Hypothetical protein ZEAMMB73_634657	lVTASPsLR	T(3): 100.0; Y(7): 100.0; S(16): 100.0	↓(PEG −0.7MPa, 8h)		Zea mays	Hu et al., 2015
			K7VUD1	Hypothetical protein ZEAMMB73_259781	lQHARAsSAPHPSR	S(15): 100.0	↓(PEG −0.7MPa, 8h)		Zea mays	Hu et al., 2015
			K7VD18	Hypothetical protein ZEAMMB73_026023	tSDADsEAGSGSGGGGR	S(3): 100.0; S(5): 100.0	↑(PEG −0.7MPa, 8h)		Zea mays	Hu et al., 2015
			B6SJ48	Hypothetical protein	ePVsPGtPSSVAAGR	S(3): 100.0; S(7): 100.0	↑(PEG −0.7MPa, 8h)		Zea mays	Hu et al., 2015
			B6UF28	Hypothetical protein	nEAAsR	S(3): 80.0; S(4): 80.0	↓(PEG −0.7MPa, 8h)		Zea mays	Hu et al., 2015
			C0PE12	Hypothetical protein	aQIAtVR	S(7): 83.3	↑(PEG −0.7MPa, 8h)		Zea mays	Hu et al., 2015
			C0PE12	Hypothetical protein	aQAEEEtLASER	S(5): 99.5; S(7): 100.0	↓(PEG −0.7MPa, 8h)		Zea mays	Hu et al., 2015
			K7VBA5	hypothetical protein	aNsGGQPQAR	T(2): 100.0	↑(PEG −0.7MPa, 8h)		Zea mays	Hu et al., 2015
			K7VBI0	Hypothetical protein	sIsETTLER	S(3): 100.0	↑(PEG −0.7MPa, 8h)		Zea mays	Hu et al., 2015
			K7UTD5	Hypothetical protein	sSGGAsPR	S(15):99.9	↓(PEG −0.7MPa, 8h)		Zea mays	Hu et al., 2015
			B6TDN3	Uncharacterizedprotein LOC100276536	gAsAPPsPAGSPDGLIAALR	S(6): 100.0	↑(PEG −0.7MPa, 8h)		Zea mays	Hu et al., 2015
			B6UDS8	Uncharacterized protein LOC100278798	hWASGARsR	S(4): 100.0	↓(PEG −0.7MPa, 8h)		Zea mays	Hu et al., 2015
			B6TZS3	Uncharacterized protein LOC100277773	gEGmGSAVADSGEsR	S(4): 99.7	↑(PEG −0.7MPa, 8h)		Zea mays	Hu et al., 2015
			B4FZB5	Uncharacterized protein LOC100274151	nGYtSVLEAR	S(4): 99.7; S(10): 99.8	↑(PEG −0.7MPa, 8h)		Zea mays	Hu et al., 2015
			B4G0P6	Uncharacterized membrane protein at1g16860-like	nTsFGGAASNsGPVSNAVGR	S(2): 82.0; S(6): 82.0	↓(PEG −0.7MPa, 8h)		Zea mays	Hu et al., 2015
			B6UHG9	Uncharacterized abhydrolase domain-containing protein ddb_g0269086-like	gGVPYGGPGATYGGsPSFATGGGQQPFR	S(12): 100.0	↓(PEG −0.7MPa, 8h)		Zea mays	Hu et al., 2015
			B4FS10	TPA: hypothetical protein ZEAMMB73_767959	aktTAGk	T(9): 50.0; T(10): 50.0	↑(PEG −0.7MPa, 8h)		Zea mays	Hu et al., 2015
			K7UTW7	Hypothetical protein ZEAMMB73_512164	eAGDLVAGGcGEEGsPQADAk	S(15): 100.0	↓(PEG −0.7MPa, 8h)		Zea mays	Hu et al., 2015
				Unnamed protein product	ELDTSSVGYQS(ph)PLPADK (HX10)/ELDTSSVGYQS(ph)PLPADK (NC47)	S126 (HX10)/S126 (NC47)	↓(20% PEG, 48 h, HX10)	↓(20% PEG, 48 h, NC47)	Triticum aestivum	Zhang et al., 2014
				Hypothetical protein TRIUR3_20910	VAEQLS(ph)DDEGEDQSK (HX10)/VAEQLS(ph)DDEGEDQSK (NC47)	S113 (HX10)/S113 (NC47)	↓(20% PEG, 48 h, HX10)	↓(20% PEG, 48 h, NC47)	Triticum aestivum	Zhang et al., 2014
				Hypothetical protein TRIUR3_16431	LEVSPS(ph)VSTPVSWVR (HX10)/LEVSPS(ph)VSTPVSWVR (NC47)	S569 (HX10)/S569 (NC47)			Triticum aestivum	Zhang et al., 2014
				Hypothetical protein TRIUR3_22968	NAS(ph)LEGADLVIQEDQR (HX10)/NEDSIEDVDS(ph)PR (NC47)	S600 (HX10)/S452 (NC47)	(−)(20% PEG, 48 h, HX10)	↓(20% PEG, 48 h, NC47)	Triticum aestivum	Zhang et al., 2014
				Hypothetical protein TRIUR3_30619	WPGSAS(ph)APSGAGHGPASK (HX10)/WPGSAS(ph)APSGAGHGPASK (NC47)	S46 (HX10)/S46 (NC47)	↓(20% PEG, 48 h, HX10)	(+)(20% PEG, 48 h, NC47)	Triticum aestivum	Zhang et al., 2014
				Hypothetical protein TRIUR3_18554	KGAS(ph)DS(ph)DTDVDIGR (HX10)/KEEVQEADS(ph)DEDWDPR (NC47)	S251 (HX10)/S237 (NC47)	↓(20% PEG, 48 h, HX10)	↓(20% PEG, 48 h, NC47)	Triticum aestivum	Zhang et al., 2014
					KGAS(ph)DS(ph)DTDVDIGR (HX10)	s249 (HX10)	↓(20% PEG, 48 h, HX10)		Triticum aestivum	Zhang et al., 2014
				Hypothetical protein TRIUR3_11299	NLPNDTDDLQS(ph)PLSTK (HX10)/FSNSELDNS(ph)EK (NC47)	S3655 (HX10)/S3766 (NC47)	↓(20% PEG, 48 h, HX10)	(−)(20% PEG, 48 h, NC47)	Triticum aestivum	Zhang et al., 2014
				Hypothetical protein TRIUR3_31419	AGGGGAAHGS(ph)LPVAIPDWSK (HX10)/AGGGGAAHGS(ph)LPVAIPDWSK (NC47)	S16 (HX10)/S16 (NC47)	↑(20% PEG, 48 h, HX10)	(+)(20% PEG, 48 h, NC47)	Triticum aestivum	Zhang et al., 2014
					AAS(ph)LS(ph)VNDGMGVGR (HX10)	S71 (HX10)			Triticum aestivum	Zhang et al., 2014
				Hypothetical protein F775_30592	(ac)AGGS(ph)PAKEEVR (HX10)/ELM(ox)EDS(ph)DGEIK (NC47)	s5 (HX10)/s319 (NC47)	↑(20% PEG, 48 h, HX10)	↓(20% PEG, 48 h, NC47)	Triticum aestivum	Zhang et al., 2014
	Reference:
	[1] Ke, Y.Q.; Han, G.Q.; He, H.Q. Li, J.X. Differential regulation of proteins and phosphoproteins in rice under drought stress. Biochem. Bioph. Res. Co., 2009, 379, 133-138.
	[2] Zhang, M.; Lv, D.W.; Ge, P.; Bian, Y.W.; Chen, G.X.; Zhu, G.R.; Li, X.H. Yan, Y.M. Phosphoproteome analysis reveals new drought response and defense mechanisms of seedling leaves in bread wheat (Triticum aestivum L.). Journal of Proteomics, 2014, 109, 290-308.
	[3] Bonhomme, L.; Valot, B.; Tardieu, F. Zivy, M. Phosphoproteome dynamics upon changes in plant water status reveal early events associated with rapid growth adjustment in maize leaves. Mol. Cellular Proteomics, 2012, 11, 957-972.
	[4] Hu, X.L.; Wu, L.J.; Zhao, F.Y.; Zhang, D.Y.; Li, N.N.; Zhu, G.H.; Li, C.H. Wang, W. Phosphoproteomic analysis of the response of maize leaves to drought, heat and their combination stress. Front. Plant Sci., 2015, 6, doi: 10.3389/fpls.2015.00298.
